# Supplementary material for: Impact of Next Generation Sequencing in Unraveling the Genetics of 1036 Spanish Families With Inherited Macular Dystrophies
Source: PubMed Central journal article supplement — Invest Ophthalmol Vis Sci. 2022 Feb 4;63(2):11. doi: 10.1167/iovs.63.2.11 (PMC8819279; doi:10.1167/iovs.63.2.11), 2022-02-04
Supplement: iovs-63-2-11_s001.pdf [file iovs-63-2-11_s001.pdf]

**Figure S1.** Overview of characterization rates in patients re-studied using different NGS approaches, and the new cases studied by clinical exome and their classification by diagnosis clinical groups. Patients with \* are patients recruited after 2017 re-studied by the sequencing of the entire *ABCA4* gene. Abbreviations: STGD: Stargardt; CCRD: cone and cone-rod dystrophy; otherMD: other maculopathies.

|                   | Re-studied |     |                                                                                                                                                              | New cases |                                                                                                                                                   |  |
|-------------------|------------|-----|--------------------------------------------------------------------------------------------------------------------------------------------------------------|-----------|---------------------------------------------------------------------------------------------------------------------------------------------------|--|
| STGD diagnosis    | 114<br>17* | 52% | <ul style="list-style-type: none"> <li>Solved <i>ABCA4</i>: 66 + 6* (55%)</li> <li>Solved other genes: 15 (11%)</li> <li>Unsolved: 33 + 11* (34%)</li> </ul> | 116 (40%) | <ul style="list-style-type: none"> <li>Solved <i>ABCA4</i>: 87 (75%)</li> <li>Solved other genes: 3 (3%)</li> <li>Unsolved: 26 (22%)</li> </ul>   |  |
| CCRD diagnosis    | 48<br>2*   | 20% | <ul style="list-style-type: none"> <li>Solved <i>ABCA4</i>: 15 (31%)</li> <li>Solved other genes: 12 (25%)</li> <li>Unsolved: 21 (44%)</li> </ul>            | 40 (14%)  | <ul style="list-style-type: none"> <li>Solved <i>ABCA4</i>: 12 (30%)</li> <li>Solved other genes: 12 (30%)</li> <li>Unsolved: 16 (40%)</li> </ul> |  |
| otherMD diagnosis | 61<br>8*   | 28% | <ul style="list-style-type: none"> <li>Solved <i>ABCA4</i>: 4 + 3* (10%)</li> <li>Solved other genes: 24 (35%)</li> <li>Unsolved: 33 + 5* (55%)</li> </ul>   | 136 (46%) | <ul style="list-style-type: none"> <li>Solved <i>ABCA4</i>: 25 (18%)</li> <li>Solved other genes: 22 (16%)</li> <li>Unsolved: 89 (66%)</li> </ul> |  |
