# Supplementary material for: Impact of Next Generation Sequencing in Unraveling the Genetics of 1036 Spanish Families With Inherited Macular Dystrophies
Source: PubMed Central journal article supplement — Invest Ophthalmol Vis Sci. 2022 Feb 4;63(2):11. doi: 10.1167/iovs.63.2.11 (PMC8819279; doi:10.1167/iovs.63.2.11), 2022-02-04
Supplement: iovs-63-2-11_s002.pdf [file iovs-63-2-11_s002.pdf]

**Table S1. Molecular characterization of 1036 ar/sMD families over 30 years.** Table S1A includes the study of 744 cases recruited since 1991 to 2017 in HUFJD. Table S1B includes the additional technologies used to characterize patients unsolved until 2017 (in blue). Table S1C includes the study of 292 cases recruited between January 2017 and October 2020 in HUFJD. #Gene panels has been previously described in Martin-Merida et al., 2019. \$smMIPs technology has been previously reported in Khan et al., 2020. Cases in which c.4253+43G>A, c.4539+2064C>T, and c.5196+1137G>A variants have been sequenced are in orange. Cases without NGS studies are in red.

**Table S1A**

| Technology                               | Initial cases (1991-2017) |      |         |               |      |         |
|------------------------------------------|---------------------------|------|---------|---------------|------|---------|
|                                          | solved 2017               |      |         | unsolved 2017 |      |         |
|                                          | STGD                      | CCRD | otherMD | STGD          | CCRD | otherMD |
| Genotyping microarrays/Sanger sequencing | 240                       | 45   | 6       | 123           | 53   | 56      |
| Gene panels (up to 82 genes)#            | 33                        | 39   | 12      | 57            | 39   | 33      |
| WES                                      | x                         | 5    | x       | 1             | 2    | x       |
| Total                                    | 273                       | 89   | 18      | 181           | 94   | 89      |

**Table S1B**

| Technology                                                                                 | Re-studied cases (unsolved 1991-2017) |      |         |               |         |         |
|--------------------------------------------------------------------------------------------|---------------------------------------|------|---------|---------------|---------|---------|
|                                                                                            | solved 2020                           |      |         | unsolved 2020 |         |         |
|                                                                                            | STGD                                  | CCRD | otherMD | STGD          | CCRD    | otherMD |
| Gene panel with <i>ABCA4</i> variants reported by Braun et al., 2013.                      | 18                                    | 1    | x       | 1             | 1       | 1       |
| Clinical exome (up to 229 genes)                                                           | 32                                    | 23   | 28      | 4             | 17      | 31      |
| smMIPs for entire <i>ABCA4</i> gene \$ (in orange only prevalent DI <i>ABCA4</i> variants) | 28                                    | 2    | x       | 3 + 3         | 1       | 1       |
| Clinical exome + smMIPs <i>ABCA4</i> (in orange only prevalent DI <i>ABCA4</i> variants)   | x                                     | x    | x       | 18 + 4        | 2       | x       |
| WES                                                                                        | 3                                     | 1    | x       | x             | x       | x       |
| Total of re-studied cases                                                                  | 81                                    | 27   | 28      | 33            | 21      | 33      |
| No more studies since 2017 (in red without NGS)                                            | x                                     | x    | x       | 67 (53)       | 46 (23) | 27 (15) |

**Table S1C**

| Technology                                                                                  | New cases (2017-2020) |      |         |               |      |         |
|---------------------------------------------------------------------------------------------|-----------------------|------|---------|---------------|------|---------|
|                                                                                             | solved 2020           |      |         | unsolved 2020 |      |         |
|                                                                                             | STGD                  | CCRD | otherMD | STGD          | CCRD | otherMD |
| Sequencing of the <i>ABCA4</i> gene (Asper Biogen)                                          | 18                    | x    | x       | x             | x    | 4       |
| Clinical exome (up to 229 genes)                                                            | 66                    | 24   | 44      | 12            | 14   | 80      |
| Sequencing of the <i>ABCA4</i> gene (Asper Biogen) + smMIPs for entire <i>ABCA4</i> gene \$ | 6                     | x    | 3       | 1             | 1    | x       |
| Clinical exome + smMIPs <i>ABCA4</i> (in orange only prevalent DI <i>ABCA4</i> variants)    | x                     | x    | x       | 10 + 2        | 1    | 5       |
| Clinical exome + WES                                                                        | x                     | x    | x       | 1             | x    | x       |
| Total                                                                                       | 90                    | 24   | 47      | 26            | 16   | 89      |

Abbreviations: STGD: Stargardt disease; CCRD: cone and cone-rod dystrophy; DI: deep intronic; otherMD; other maculopathy; smMIPs: single molecule molecular inversion probes; WES: whole exome sequencing; NGS: next generation sequencing technologies.
