# Supplementary material for: Impact of Next Generation Sequencing in Unraveling the Genetics of 1036 Spanish Families With Inherited Macular Dystrophies
Source: PubMed Central journal article supplement — Invest Ophthalmol Vis Sci. 2022 Feb 4;63(2):11. doi: 10.1167/iovs.63.2.11 (PMC8819279; doi:10.1167/iovs.63.2.11), 2022-02-04
Supplement: iovs-63-2-11_s003.pdf [file iovs-63-2-11_s003.pdf]

**Table S2. Description of genetics and clinical findings in 677 characterized *a priori* ar/SMD families. Novel variants are highlighted in gray.**

| Family  | Suspected diagnosis | Gene  | RefSeq_NM | Allele1_exon | Allele1_cDNA             | Allele1_protein                    | Allele2_exon | Allele2_cDNA             | Allele2_protein                   | Inheritance a priori | Final inheritance | Clinical reclassification            | Genetic reclassification | Segregation |
|---------|---------------------|-------|-----------|--------------|--------------------------|------------------------------------|--------------|--------------------------|-----------------------------------|----------------------|-------------------|--------------------------------------|--------------------------|-------------|
| MD-0012 | STGD                | ABCA4 | NM_000350 | 25,42        | c.[3758C>T;5882G>A]      | p.[Thr1253Met;Gly1961Glu]          | 27           | c.3943C>T                | p.(Gln1315*)                      | AR                   | AR                | Stargardt disease/cone-rod dystrophy |                          | Yes         |
| MD-0014 | STGD                | ABCA4 | NM_000350 | 22,46        | c.[3322C>T;6320G>A]      | p.[Arg1108Cys;Arg2107His]          | 22,46        | c.[3322C>T;6320G>A]      | p.[Arg1108Cys;Arg2107His]         | sporadic             | AR                | Stargardt disease/cone-rod dystrophy |                          | Yes         |
| MD-0015 | STGD                | ABCA4 | NM_000350 | 17           | c.[2588G>C;3163C>T]      | p.[Gly863Ala;Gly634del;Arg1055Trp] | 19           | c.2888del                | p.(Gly963Alafs*14)                | AR                   | AR                | Stargardt disease/cone-rod dystrophy |                          | Yes         |
| MD-0017 | STGD                | ABCA4 | NM_000350 | 22,46        | c.[3322C>T;6320G>A]      | p.[Arg1108Cys;Arg2107His]          | 46           | c.6320G>C                | p.(Arg2107Pro)                    | sporadic             | AR                | Stargardt disease/cone-rod dystrophy |                          | Yes         |
| MD-0022 | STGD                | ABCA4 | NM_000350 | 19           | c.2888del                | p.(Gly963Alafs*14)                 | 45           | c.6179T>G                | p.(Leu2060Arg)                    | AR                   | AR                | Stargardt disease/cone-rod dystrophy |                          | Yes         |
| MD-0031 | OtherMD             | ABCA4 | NM_000350 | 23           | c.3386G>T                | p.(Arg1129Leu)                     | 35           | c.4926C>G                | p.(Ser1642Arg)                    | sporadic             | AR                | Stargardt disease/cone-rod dystrophy |                          | Yes         |
| MD-0038 | STGD                | ABCA4 | NM_000350 | 13           | c.1804C>T                | p.(Arg602Trp)                      | 33           | c.4739del                | p.(Leu1580*)                      | sporadic             | AR                | Stargardt disease/cone-rod dystrophy |                          | Yes         |
| MD-0039 | STGD                | ABCA4 | NM_000350 | 6            | c.699_768+341del         | p.(Gln234Phefs*5)                  | IVS40        | c.5714+5G>A              | p.[= Glu1863Leufs*33]             | sporadic             | AR                | Stargardt disease/cone-rod dystrophy |                          | Yes         |
| MD-0040 | STGD                | ABCA4 | NM_000350 | 21           | c.3056C>T                | p.(Thr1019Met)                     | 27           | c.3943C>T                | p.(Gln1315*)                      | sporadic             | AR                | Stargardt disease/cone-rod dystrophy |                          | Yes         |
| MD-0047 | STGD                | ABCA4 | NM_000350 | 23           | c.3386G>T                | p.(Arg1129Leu)                     | 23           | c.3386G>T                | p.(Arg1129Leu)                    | AR                   | AR                | Stargardt disease/cone-rod dystrophy |                          | Yes         |
| MD-0051 | STGD                | ABCA4 | NM_000350 | 22           | c.3292C>T                | p.(Arg1098Cys)                     | 35           | c.4855T>C                | p.(Phe1619Leu)                    | AR                   | AR                | Stargardt disease/cone-rod dystrophy |                          | Yes         |
| MD-0057 | STGD                | ABCA4 | NM_000350 | 23           | c.3386G>T                | p.(Arg1129Leu)                     | 42           | c.5882G>A                | p.(Gly1961Glu)                    | sporadic             | AR                | Stargardt disease/cone-rod dystrophy |                          | Yes         |
| MD-0060 | STGD                | ABCA4 | NM_000350 | 13           | c.1804C>T                | p.(Arg602Trp)                      | 42           | c.5882G>A                | p.(Gly1961Glu)                    | sporadic             | AR                | Stargardt disease/cone-rod dystrophy |                          | Yes         |
| MD-0061 | STGD                | ABCA4 | NM_000350 | 23           | c.3386G>T                | p.(Arg1129Leu)                     | 23           | c.3386G>T                | p.(Arg1129Leu)                    | sporadic             | AR                | Stargardt disease/cone-rod dystrophy |                          | Yes         |
| MD-0062 | STGD                | ABCA4 | NM_000350 | 23           | c.3386G>T                | p.(Arg1129Leu)                     | 43           | c.5929G>A                | p.(Gly1977Ser)                    | sporadic             | AR                | Stargardt disease/cone-rod dystrophy |                          | Yes         |
| MD-0064 | STGD                | ABCA4 | NM_000350 | 6            | c.634C>T                 | p.(Arg212Cys)                      | 43           | c.5929G>A                | p.(Gly1977Ser)                    | AR                   | AR                | Stargardt disease/cone-rod dystrophy |                          | Yes         |
| MD-0065 | STGD                | ABCA4 | NM_000350 | 42           | c.5882G>A                | p.(Gly1961Glu)                     | IVS7         | c.859_506G>C             | p.[Phe287Thrfs*32;=]              | sporadic             | AR                | Stargardt disease/cone-rod dystrophy |                          | Yes         |
| MD-0066 | STGD                | ABCA4 | NM_000350 | 23           | c.3386G>T                | p.(Arg1129Leu)                     | 41           | c.5819T>C                | p.(Leu1940Pro)                    | sporadic             | AR                | Stargardt disease/cone-rod dystrophy |                          | NA          |
| MD-0072 | STGD                | ABCA4 | NM_000350 | 13           | c.1804C>T                | p.(Arg602Trp)                      | 22           | c.3287C>T                | p.(Ser1096Leu)                    | sporadic             | AR                | Stargardt disease/cone-rod dystrophy |                          | Yes         |
| MD-0076 | STGD                | ABCA4 | NM_000350 | 6            | c.768G>T                 | p.(Val256Val)                      | 23           | c.3386G>T                | p.(Arg1129Leu)                    | sporadic             | AR                | Stargardt disease/cone-rod dystrophy |                          | NA          |
| MD-0078 | STGD                | ABCA4 | NM_000350 | 23           | c.3386G>T                | p.(Arg1129Leu)                     | 48           | c.6559G>T                | p.(Gln2187*)                      | AR                   | AR                | Stargardt disease/cone-rod dystrophy |                          | Yes         |
| MD-0079 | CCRD                | ABCA4 | NM_000350 | 19           | c.2888del                | p.(Gly963Alafs*14)                 | 19           | c.2888del                | p.(Gly963Alafs*14)                | sporadic             | AR                | Stargardt disease/cone-rod dystrophy |                          | Yes         |
| MD-0081 | STGD                | ABCA4 | NM_000350 | 29           | c.4297G>A                | p.(Val1433Ile)                     | 42           | c.5882G>A                | p.(Gly1961Glu)                    | sporadic             | AR                | Stargardt disease/cone-rod dystrophy |                          | Yes         |
| MD-0082 | STGD                | ABCA4 | NM_000350 | 23           | c.3386G>A                | p.(Glu1122Lys)                     | 23           | c.3386G>A                | p.(Arg1129Leu)                    | sporadic             | AR                | Stargardt disease/cone-rod dystrophy |                          | Yes         |
| MD-0084 | STGD                | ABCA4 | NM_000350 | 47           | c.6410G>A                | p.(Cys2137Tyr)                     | 47           | c.6410G>A                | p.(Cys2137Tyr)                    | sporadic             | AR                | Stargardt disease/cone-rod dystrophy |                          | Yes         |
| MD-0086 | CCRD                | ABCA4 | NM_000350 | 19           | c.2888del                | p.(Gly963Alafs*14)                 | 19           | c.2888del                | p.(Gly963Alafs*14)                | sporadic             | AR                | Stargardt disease/cone-rod dystrophy |                          | NA          |
| MD-0088 | STGD                | ABCA4 | NM_000350 | 28           | c.4139C>T                | p.(Pro1380Leu)                     | IVS40        | c.5714+5G>A              | p.[= Glu1863Leufs*33]             | AR                   | AR                | Stargardt disease/cone-rod dystrophy |                          | NA          |
| MD-0090 | STGD                | ABCA4 | NM_000350 | IVS22        | c.3329-2A>T              | p.?                                | 43           | c.5929G>A                | p.(Gly1977Ser)                    | AR                   | AR                | Stargardt disease/cone-rod dystrophy |                          | Yes         |
| MD-0094 | OtherMD             | ABCA4 | NM_000350 | 14           | c.1964T>G                | p.(Phe655Cys)                      | 16           | c.2481del                | p.(Thr829Argfs*14)                | sporadic             | AR                | Stargardt disease/cone-rod dystrophy |                          | NA          |
| MD-0096 | STGD                | ABCA4 | NM_000350 | 23           | c.3386G>T                | p.(Arg1129Leu)                     | 28           | c.[4222T>C;4918C>T]      | p.[Trp1408Arg;Arg1640Trp]         | sporadic             | AR                | Stargardt disease/cone-rod dystrophy |                          | Yes         |
| MD-0110 | STGD                | ABCA4 | NM_000350 | 22,46        | c.[3322C>T;6320G>A]      | p.[Arg1108Cys;Arg2107His]          | 42           | c.5882G>A                | p.(Gly1961Glu)                    | AR                   | AR                | Stargardt disease/cone-rod dystrophy |                          | Yes         |
| MD-0111 | STGD                | ABCA4 | NM_000350 | 23           | c.3386G>T                | p.(Arg1129Leu)                     | 23           | c.3386G>T                | p.(Arg1129Leu)                    | sporadic             | AR                | Stargardt disease/cone-rod dystrophy |                          | Yes         |
| MD-0116 | STGD                | ABCA4 | NM_000350 | 22,46        | c.[3322C>T;6320G>A]      | p.[Arg1108Cys;Arg2107His]          | 30           | c.4469G>A                | p.(Cys1490Tyr)                    | sporadic             | AR                | Stargardt disease/cone-rod dystrophy |                          | Yes         |
| MD-0119 | STGD                | ABCA4 | NM_000350 | 23           | c.3386G>T                | p.(Arg1129Leu)                     | 23           | c.3386G>T                | p.(Arg1129Leu)                    | sporadic             | AR                | Stargardt disease/cone-rod dystrophy |                          | Yes         |
| MD-0125 | STGD                | ABCA4 | NM_000350 | 22           | c.3210_3211dup           | p.(Ser1071Cysfs*14)                | 40           | c.5630_5644dup           | p.(Lys1877_ Ala1881dup)           | sporadic             | AR                | Stargardt disease/cone-rod dystrophy |                          | Yes         |
| MD-0126 | CCRD                | ABCA4 | NM_000350 | 43           | c.5929G>A                | p.(Gly1977Ser)                     | 43           | c.5929G>A                | p.(Gly1977Ser)                    | AR                   | AR                | Stargardt disease/cone-rod dystrophy |                          | Yes         |
| MD-0128 | STGD                | ABCA4 | NM_000350 | 23           | c.3386G>T                | p.(Arg1129Leu)                     | 23           | c.3386G>T                | p.(Arg1129Leu)                    | sporadic             | AR                | Stargardt disease/cone-rod dystrophy |                          | Yes         |
| MD-0133 | CCRD                | ABCA4 | NM_000350 | 1            | c.32T>C                  | p.(Leu11Pro)                       | 19           | c.2888del                | p.(Gly963Alafs*14)                | AR                   | AR                | Stargardt disease/cone-rod dystrophy |                          | Yes         |
| MD-0135 | STGD                | ABCA4 | NM_000350 | 8            | c.1029dup                | p.(Asn344*)                        | 42           | c.5882G>A                | p.(Gly1961Glu)                    | AR                   | AR                | Stargardt disease/cone-rod dystrophy |                          | NA          |
| MD-0137 | STGD                | ABCA4 | NM_000350 | 22,46        | c.[3322C>T;6320G>A]      | p.[Arg1108Cys;Arg2107His]          | IVS40        | c.5714+5G>A              | p.[= Glu1863Leufs*33]             | sporadic             | AR                | Stargardt disease/cone-rod dystrophy |                          | Yes         |
| MD-0138 | STGD                | ABCA4 | NM_000350 | 17           | c.2588G>C                | p.(Gly863Ala)                      | 30           | c.4537dup                | p.(Gln1513Profs*42)               | AR                   | AR                | Stargardt disease/cone-rod dystrophy |                          | Yes         |
| MD-0139 | STGD                | ABCA4 | NM_000350 | 22,46        | c.[3322C>T;6320G>A]      | p.[Arg1108Cys;Arg2107His]          | 23           | c.3386G>T                | p.(Arg1129Leu)                    | sporadic             | AR                | Stargardt disease/cone-rod dystrophy |                          | Yes         |
| MD-0146 | STGD                | ABCA4 | NM_000350 | 21           | c.3056C>T                | p.(Thr1019Met)                     | 44           | c.6140T>A                | p.(Ile2047Asn)                    | sporadic             | AR                | Stargardt disease/cone-rod dystrophy |                          | Yes         |
| MD-0153 | STGD                | ABCA4 | NM_000350 | 22           | c.3210_3211dup           | p.(Ser1071Cysfs*14)                | 42           | c.5881G>A                | p.(Gly1961Arg)                    | sporadic             | AR                | Stargardt disease/cone-rod dystrophy |                          | Yes         |
| MD-0155 | STGD                | ABCA4 | NM_000350 | 13           | c.1804C>T                | p.(Arg602Trp)                      | 23           | c.3386G>T                | p.(Arg1129Leu)                    | sporadic             | AR                | Stargardt disease/cone-rod dystrophy |                          | Yes         |
| MD-0158 | STGD                | ABCA4 | NM_000350 | 22           | c.3210_3211dup           | p.(Ser1071Cysfs*14)                | 30           | c.4537del                | p.(Gln1513Argfs*13)               | sporadic             | AR                | Stargardt disease/cone-rod dystrophy |                          | NA          |
| MD-0162 | STGD                | ABCA4 | NM_000350 | IVS6-Ex6     | c.699_768+341del         | p.(Gln234Phefs*5)                  | 23           | c.3386G>T                | p.(Arg1129Leu)                    | AR                   | AR                | Stargardt disease/cone-rod dystrophy |                          | Yes         |
| MD-0163 | STGD                | ABCA4 | NM_000350 | 30           | c.4457C>T                | p.(Pro1486Leu)                     | 36           | c.5172G>T                | p.(Trp1724Cys)                    | sporadic             | AR                | Stargardt disease/cone-rod dystrophy |                          | Yes         |
| MD-0164 | STGD                | ABCA4 | NM_000350 | 6            | c.700C>T                 | p.(Gln234*)                        | 23           | c.3386G>T                | p.(Arg1129Leu)                    | AR                   | AR                | Stargardt disease/cone-rod dystrophy |                          | Yes         |
| MD-0165 | STGD                | ABCA4 | NM_000350 | 22,40        | c.[3210_3211dup;5603A>T] | p.[Ser1071Cysfs*14;Asn1868Ile]     | 40           | c.5603A>T                | p.(Asn1868Ile)                    | sporadic             | AR                | Stargardt disease/cone-rod dystrophy |                          | NA          |
| MD-0166 | STGD                | ABCA4 | NM_000350 | IVS6-Ex6     | c.699_768+341del         | p.(Gln234Phefs*5)                  | 46           | c.6320G>A                | p.(Arg2107His)                    | AR                   | AR                | Stargardt disease/cone-rod dystrophy |                          | Yes         |
| MD-0167 | STGD                | ABCA4 | NM_000350 | 22           | c.3210_3211dup           | p.(Ser1071Cysfs*14)                | 22           | c.3281C>G                | p.(Pro1094Arg)                    | AR                   | AR                | Stargardt disease/cone-rod dystrophy |                          | NA          |
| MD-0168 | STGD                | ABCA4 | NM_000350 | 42           | c.5882G>A                | p.(Gly1961Glu)                     | 45           | c.6179T>G                | p.(Leu2060Arg)                    | sporadic             | AR                | Stargardt disease/cone-rod dystrophy |                          | Yes         |
| MD-0170 | STGD                | ABCA4 | NM_000350 | 9            | c.1222C>T                | p.(Arg408*)                        | 30           | c.4457C>T                | p.(Pro1486Leu)                    | sporadic             | AR                | Stargardt disease/cone-rod dystrophy |                          | Yes         |
| MD-0173 | STGD                | ABCA4 | NM_000350 | IVS30        | c.4539+2064C>T           | p.[= Arg1514Leufs*36]              | IVS30        | c.4539+2064C>T           | p.[= Arg1514Leufs*36]             | AR                   | AR                | Stargardt disease/cone-rod dystrophy |                          | Yes         |
| MD-0174 | CCRD                | ABCA4 | NM_000350 | 25           | c.4918C>T                | p.(Arg1640Trp)                     | IVS44        | c.6147+2T>A              | p.?                               | AR                   | AR                | Stargardt disease/cone-rod dystrophy |                          | Yes         |
| MD-0176 | CCRD                | ABCA4 | NM_000350 | 19           | c.2888del                | p.(Gly963Alafs*14)                 | 45           | c.6179T>G                | p.(Leu2060Arg)                    | AR                   | AR                | Stargardt disease/cone-rod dystrophy |                          | Yes         |
| MD-0178 | STGD                | ABCA4 | NM_000350 | 22           | c.3210_3211dup           | p.(Ser1071Cysfs*14)                | 46           | c.6320G>C                | p.(Arg2107Pro)                    | AR                   | AR                | Stargardt disease/cone-rod dystrophy |                          | NA          |
| MD-0181 | STGD                | ABCA4 | NM_000350 | 22           | c.3323G>A                | p.(Arg1108His)                     | IVS38        | c.5460+5G>A              | p.[Trp1772Argfs*9]                | AR                   | AR                | Stargardt disease/cone-rod dystrophy |                          | Yes         |
| MD-0183 | STGD                | ABCA4 | NM_000350 | 43           | c.5929G>A                | p.(Gly1977Ser)                     | 44           | c.6079C>T                | p.(Leu2027Phe)                    | sporadic             | AR                | Stargardt disease/cone-rod dystrophy |                          | Yes         |
| MD-0187 | STGD                | ABCA4 | NM_000350 | 28           | c.4139C>T                | p.(Pro1380Leu)                     | 42           | c.5882G>A                | p.(Gly1961Glu)                    | sporadic             | AR                | Stargardt disease/cone-rod dystrophy |                          | NA          |
| MD-0190 | CCRD                | ABCA4 | NM_000350 | 22           | c.3210_3211dup           | p.(Ser1071Cysfs*14)                | 38           | c.5395A>G                | p.(Asn1799Asp)                    | AR                   | AR                | Stargardt disease/cone-rod dystrophy |                          | Yes         |
| MD-0191 | STGD                | ABCA4 | NM_000350 | 13           | c.1804C>T                | p.(Arg602Trp)                      | 23           | c.3386G>T                | p.(Arg1129Leu)                    | AR                   | AR                | Stargardt disease/cone-rod dystrophy |                          | Yes         |
| MD-0194 | STGD                | ABCA4 | NM_000350 | 19           | c.2791G>A                | p.(Val931Met)                      | 22           | c.3210_3211dup           | p.(Ser1071Cysfs*14)               | sporadic             | AR                | Stargardt disease/cone-rod dystrophy |                          | Yes         |
| MD-0196 | STGD                | ABCA4 | NM_000350 | 23           | c.3386G>T                | p.(Arg1129Leu)                     | 40           | c.5644A>G                | p.(Met1882Val)                    | AR                   | AR                | Stargardt disease/cone-rod dystrophy |                          | Yes         |
| MD-0198 | STGD                | ABCA4 | NM_000350 | 19           | c.2888del                | p.(Gly963Alafs*14)                 | 23           | c.3386G>T                | p.(Arg1129Leu)                    | sporadic             | AR                | Stargardt disease/cone-rod dystrophy |                          | Yes         |
| MD-0200 | STGD                | ABCA4 | NM_000350 | 14           | c.2041C>T                | p.(Arg681*)                        | 23           | c.3386G>T                | p.(Arg1129Leu)                    | sporadic             | AR                | Stargardt disease/cone-rod dystrophy |                          | Yes         |
| MD-0203 | STGD                | ABCA4 | NM_000350 | 35           | c.4918C>T                | p.(Arg1640Trp)                     | 42           | c.5882G>A                | p.(Gly1961Glu)                    | AR                   | AR                | Stargardt disease/cone-rod dystrophy |                          | Yes         |
| MD-0206 | CCRD                | ABCA4 | NM_000350 | 35,36        | c.[4926C>G;5044_5058del] | p.[Ser1642Arg;Val1682_Val1686del]  | 35,36        | c.[4926C>G;5044_5058del] | p.[Ser1642Arg;Val1682_Val1686del] | AR                   | AR                | Stargardt disease/cone-rod dystrophy |                          | Yes         |
| MD-0207 | STGD                | ABCA4 | NM_000350 | 30           | c.4537dup                | p.(Gln1513Profs*42)                | 42           | c.5882G>A                | p.(Gly1961Glu)                    | sporadic             | AR                | Stargardt disease/cone-rod dystrophy |                          | Yes         |
| MD-0213 | CCRD                | ABCA4 | NM_000350 | 13           | c.1804C>T                |                                    |              |                          |                                   |                      |                   |                                      |                          |             |

Table S2. Description of genetics and clinical findings in 677 characterized *a priori* ar/SMD families. Novel variants are highlighted in gray.

| Family  | Suspected diagnosis | Gene  | RefSeq_NM | Allele1_exon | Allele1_cDNA        | Allele1_protein          | Allele2_exon | Allele2_cDNA        | Allele2_protein           | Inheritance a priori | Final inheritance | Clinical reclassification            | Genetic reclassification | Segregation |
|---------|---------------------|-------|-----------|--------------|---------------------|--------------------------|--------------|---------------------|---------------------------|----------------------|-------------------|--------------------------------------|--------------------------|-------------|
| MD-0216 | STGD                | ABCA4 | NM_000350 | 31           | c.4571C>T           | p.(Thr1526Met)           | IVS40        | c.5714+5G>A         | p.[=;Glu1863Leufs*33]     | sporadic             | AR                | Stargardt disease/cone-rod dystrophy |                          | Yes         |
| MD-0218 | STGD                | ABCA4 | NM_000350 | 19           | c.2894A>G           | p.(Asn965Ser)            | 19           | c.2894A>G           | p.(Asn965Ser)             | sporadic             | AR                | Stargardt disease/cone-rod dystrophy |                          | Yes         |
| MD-0225 | STGD                | ABCA4 | NM_000350 | 42           | c.5882G>A           | p.(Gly1961Glu)           | 48           | c.6585G>A           | p.(Leu2187*)              | AR                   | AR                | Stargardt disease/cone-rod dystrophy |                          | Yes         |
| MD-0227 | STGD                | ABCA4 | NM_000350 | 23           | c.3386G>T           | p.(Arg1129Leu)           | 41           | c.5819T>C           | p.(Leu1940Pro)            | AR                   | AR                | Stargardt disease/cone-rod dystrophy |                          | Yes         |
| MD-0238 | STGD                | ABCA4 | NM_000350 | 23           | c.3386G>T           | p.(Arg1129Leu)           | 41           | c.5819T>C           | p.(Leu1940Pro)            | AR                   | AR                | Stargardt disease/cone-rod dystrophy |                          | Yes         |
| MD-0240 | STGD                | ABCA4 | NM_000350 | 15           | c.2285C>A           | p.(Ala762Glu)            | 42           | c.5882G>A           | p.(Gly1961Glu)            | AR                   | AR                | Stargardt disease/cone-rod dystrophy |                          | Yes         |
| MD-0242 | STGD                | ABCA4 | NM_000350 | 12           | c.1715G>C           | p.(Arg572Phe)            | 37           | c.5242G>A           | p.(Gly1748Arg)            | sporadic             | AR                | Stargardt disease/cone-rod dystrophy |                          | Yes         |
| MD-0244 | STGD                | ABCA4 | NM_000350 | 14           | c.1957C>T           | p.(Arg553Cys)            | 23           | c.3386G>T           | p.(Arg1129Leu)            | sporadic             | AR                | Stargardt disease/cone-rod dystrophy |                          | Yes         |
| MD-0245 | STGD                | ABCA4 | NM_000350 | IVS38        | c.4253+4G>A         | p.(Ile1377Hisfs*3)       | 33           | c.4672G>A           | p.(Gly1558Arg)            | AR                   | AR                | Stargardt disease/cone-rod dystrophy |                          | Yes         |
| MD-0247 | CCRD                | ABCA4 | NM_000350 | 23           | c.3386G>T           | p.(Arg1129Leu)           | 47           | c.6410G>A           | p.(Cys2137Tyr)            | sporadic             | AR                | Stargardt disease/cone-rod dystrophy |                          | Yes         |
| MD-0249 | STGD                | ABCA4 | NM_000350 | 36           | c.5044_5058del      | p.(Val1682_Val1686del)   | IVS40        | c.5714+5G>A         | p.[=;Glu1863Leufs*33]     | sporadic             | AR                | Stargardt disease/cone-rod dystrophy |                          | Yes         |
| MD-0252 | STGD                | ABCA4 | NM_000350 | 23           | c.3386G>T           | p.(Arg1129Leu)           | 23,48        | c.[3386G>T;6718A>G] | p.[Arg1129Leu;Thr2240Ala] | AR                   | AR                | Stargardt disease/cone-rod dystrophy |                          | Yes         |
| MD-0254 | STGD                | ABCA4 | NM_000350 | 5            | c.454C>T            | p.(Arg152*)              | 23           | c.3386G>T           | p.(Arg1129Leu)            | AR                   | AR                | Stargardt disease/cone-rod dystrophy |                          | Yes         |
| MD-0260 | STGD                | ABCA4 | NM_000350 | 13           | c.1804C>T           | p.(Arg602Tyr)            | IVS40        | c.5714+5G>A         | p.[=;Glu1863Leufs*33]     | sporadic             | AR                | Stargardt disease/cone-rod dystrophy |                          | Yes         |
| MD-0262 | STGD                | ABCA4 | NM_000350 | 13           | c.1819G>A           | p.(Gly607Arg)            | 23           | c.3386G>T           | p.(Arg1129Leu)            | sporadic             | AR                | Stargardt disease/cone-rod dystrophy |                          | NA          |
| MD-0264 | STGD                | ABCA4 | NM_000350 | 23           | c.3386G>T           | p.(Arg1129Leu)           | 47           | c.6449G>A           | p.(Cys2150Tyr)            | AR                   | AR                | Stargardt disease/cone-rod dystrophy |                          | Yes         |
| MD-0266 | CCRD                | ABCA4 | NM_000350 | 42           | c.5882G>A           | p.(Gly1961Glu)           | 45           | c.6179T>G           | p.(Leu2060Arg)            | AR                   | AR                | Stargardt disease/cone-rod dystrophy |                          | Yes         |
| MD-0267 | STGD                | ABCA4 | NM_000350 | 19           | c.2791G>A           | p.(Val9931Met)           | IVS40        | c.5714+5G>A         | p.[=;Glu1863Leufs*33]     | AR                   | AR                | Stargardt disease/cone-rod dystrophy |                          | Yes         |
| MD-0270 | STGD                | ABCA4 | NM_000350 | 6            | c.634C>T            | p.(Arg212Cys)            | 23           | c.3386G>T           | p.(Arg1129Leu)            | sporadic             | AR                | Stargardt disease/cone-rod dystrophy |                          | Yes         |
| MD-0277 | STGD                | ABCA4 | NM_000350 | 19           | c.2888del           | p.(Gly963Alafs*14)       | 23           | c.3386G>T           | p.(Arg1129Leu)            | AR                   | AR                | Stargardt disease/cone-rod dystrophy |                          | Yes         |
| MD-0279 | STGD                | ABCA4 | NM_000350 | 15           | c.2300T>A           | p.(Val767Asp)            | 43           | c.5929G>A           | p.(Gly1977Ser)            | AR                   | AR                | Stargardt disease/cone-rod dystrophy |                          | Yes         |
| MD-0280 | STGD                | ABCA4 | NM_000350 | 12           | c.1648G>A           | p.(Gly550Arg)            | 23           | c.3386G>T           | p.(Arg1129Leu)            | sporadic             | AR                | Stargardt disease/cone-rod dystrophy |                          | Yes         |
| MD-0281 | STGD                | ABCA4 | NM_000350 | 23           | c.3386G>T           | p.(Arg1129Leu)           | 36           | c.5044_5058del      | p.(Val1682_Val1686del)    | sporadic             | AR                | Stargardt disease/cone-rod dystrophy |                          | Yes         |
| MD-0283 | STGD                | ABCA4 | NM_000350 | 19           | c.2888del           | p.(Gly963Alafs*14)       | 23           | c.3386G>T           | p.(Arg1129Leu)            | sporadic             | AR                | Stargardt disease/cone-rod dystrophy |                          | NA          |
| MD-0284 | STGD                | ABCA4 | NM_000350 | 42           | c.5882G>A           | p.(Gly1961Glu)           | 45           | c.6179T>G           | p.(Leu2060Arg)            | sporadic             | AR                | Stargardt disease/cone-rod dystrophy |                          | NA          |
| MD-0286 | STGD                | ABCA4 | NM_000350 | 21           | c.3056C>T           | p.(Thr1019Met)           | IVS36        | c.5196+1056A>G      | p.(Met1733Valfs*2)        | sporadic             | AR                | Stargardt disease/cone-rod dystrophy |                          | Yes         |
| MD-0287 | STGD                | ABCA4 | NM_000350 | 21           | c.3056C>T           | p.(Thr1019Met)           | 23           | c.3386G>T           | p.(Arg1129Leu)            | sporadic             | AR                | Stargardt disease/cone-rod dystrophy |                          | Yes         |
| MD-0288 | STGD                | ABCA4 | NM_000350 | 8            | c.982G>T            | p.(Glu328*)              | 22           | c.3322C>T           | p.(Arg1108Cys)            | AR                   | AR                | Stargardt disease/cone-rod dystrophy |                          | Yes         |
| MD-0290 | CCRD                | ABCA4 | NM_000350 | 13           | c.1804C>T           | p.(Arg602Tyr)            | 35           | c.4919G>A           | p.(Arg1640Gln)            | sporadic             | AR                | Stargardt disease/cone-rod dystrophy |                          | NA          |
| MD-0291 | STGD                | ABCA4 | NM_000350 | 23           | c.3386G>T           | p.(Arg1129Leu)           | 45           | c.6179T>G           | p.(Leu2060Arg)            | sporadic             | AR                | Stargardt disease/cone-rod dystrophy |                          | Yes         |
| MD-0293 | OtherMD             | ABCA4 | NM_000350 | 30           | c.4457C>T           | p.(Pro1486Leu)           | 38           | c.5395A>G           | p.(Asn1799Asp)            | sporadic             | AR                | Stargardt disease/cone-rod dystrophy |                          | NA          |
| MD-0295 | CCRD                | ABCA4 | NM_000350 | 43           | c.5917del           | p.(Val1973*)             | 43           | c.5917del           | p.(Val1973*)              | AR                   | AR                | Stargardt disease/cone-rod dystrophy |                          | Yes         |
| MD-0298 | STGD                | ABCA4 | NM_000350 | 8            | c.982G>T            | p.(Glu328*)              | 43           | c.5929G>A           | p.(Gly1977Ser)            | AR                   | AR                | Stargardt disease/cone-rod dystrophy |                          | Yes         |
| MD-0299 | CCRD                | ABCA4 | NM_000350 | 1            | c.52C>T             | p.(Arg181Phe)            | 45           | c.6179T>G           | p.(Leu2060Arg)            | sporadic             | AR                | Stargardt disease/cone-rod dystrophy |                          | Yes         |
| MD-0300 | STGD                | ABCA4 | NM_000350 | 23           | c.3386G>T           | p.(Arg1129Leu)           | 39           | c.5549T>C           | p.(Leu1850Pro)            | AR                   | AR                | Stargardt disease/cone-rod dystrophy |                          | NA          |
| MD-0301 | STGD                | ABCA4 | NM_000350 | 13           | c.1792G>A           | p.(Val598Met)            | 43           | c.5914G>A           | p.(Gly1972Arg)            | sporadic             | AR                | Stargardt disease/cone-rod dystrophy |                          | NA          |
| MD-0302 | CCRD                | ABCA4 | NM_000350 | 12           | c.[1622T>C;3113C>T] | p.[Leu541Pro;Ala1038Val] | 42           | c.5882G>A           | p.(Gly1961Glu)            | AR                   | AR                | Stargardt disease/cone-rod dystrophy |                          | Yes         |
| MD-0305 | STGD                | ABCA4 | NM_000350 | 21           | c.3056C>T           | p.(Thr1019Met)           | 22           | c.3323G>A           | p.(Arg1108His)            | sporadic             | AR                | Stargardt disease/cone-rod dystrophy |                          | Yes         |
| MD-0307 | STGD                | ABCA4 | NM_000350 | 28           | c.4200C>T           | p.(Tyr1400*)             | IVS35        | c.5018+2T>C         | p.?                       | sporadic             | AR                | Stargardt disease/cone-rod dystrophy |                          | Yes         |
| MD-0308 | STGD                | ABCA4 | NM_000350 | 12           | c.1925A>G           | p.(Glu531Gly)            | IVS28        | c.4253+4C>T         | p.(Ile1377Hisfs*3)        | sporadic             | AR                | Stargardt disease/cone-rod dystrophy |                          | Yes         |
| MD-0317 | STGD                | ABCA4 | NM_000350 | 23           | c.3386G>T           | p.(Arg1129Leu)           | 23           | c.3386G>T           | p.(Arg1129Leu)            | sporadic             | AR                | Stargardt disease/cone-rod dystrophy |                          | NA          |
| MD-0318 | STGD                | ABCA4 | NM_000350 | 27           | c.4069G>A           | p.(Ala1357Thr)           | IVS28        | c.4253+5G>A         | p.(Ile1377Hisfs*3)        | sporadic             | AR                | Stargardt disease/cone-rod dystrophy |                          | Yes         |
| MD-0323 | STGD                | ABCA4 | NM_000350 | 27           | c.3899G>A           | p.(Arg1300Gln)           | 41           | c.5819T>C           | p.(Leu1940Pro)            | sporadic             | AR                | Stargardt disease/cone-rod dystrophy |                          | Yes         |
| MD-0324 | STGD                | ABCA4 | NM_000350 | 1            | c.3G>A              | p.(Met1Ile)              | 23           | c.3386G>T           | p.(Arg1129Leu)            | sporadic             | AR                | Stargardt disease/cone-rod dystrophy |                          | Yes         |
| MD-0326 | STGD                | ABCA4 | NM_000350 | 30           | c.4457C>T           | p.(Pro1486Leu)           | 43           | c.5929G>A           | p.(Gly1977Ser)            | sporadic             | AR                | Stargardt disease/cone-rod dystrophy |                          | Yes         |
| MD-0329 | STGD                | ABCA4 | NM_000350 | 41           | c.5819T>C           | p.(Leu1940Pro)           | 41           | c.5819T>C           | p.(Leu1940Pro)            | AR                   | AR                | Stargardt disease/cone-rod dystrophy |                          | Yes         |
| MD-0331 | STGD                | ABCA4 | NM_000350 | 21           | c.3056C>T           | p.(Thr1019Met)           | 23           | c.3386G>T           | p.(Arg1129Leu)            | AR                   | AR                | Stargardt disease/cone-rod dystrophy |                          | Yes         |
| MD-0334 | STGD                | ABCA4 | NM_000350 | 23           | c.3386G>T           | p.(Arg1129Leu)           | IVS38        | c.5461+10T>C        | p.(Thr1821Aspfs*6)        | AR                   | AR                | Stargardt disease/cone-rod dystrophy |                          | Yes         |
| MD-0335 | STGD                | ABCA4 | NM_000350 | 27           | c.3943C>T           | p.(Gln1315*)             | IVS36        | c.5196+1137G>A      | p.[Met1733Gulfs*78;=]     | sporadic             | AR                | Stargardt disease/cone-rod dystrophy |                          | NA          |
| MD-0336 | CCRD                | ABCA4 | NM_000350 | 44           | c.6088C>T           | p.(Arg2030*)             | 44           | c.6088C>T           | p.(Arg2030*)              | AR                   | AR                | Stargardt disease/cone-rod dystrophy |                          | Yes         |
| MD-0340 | STGD                | ABCA4 | NM_000350 | 6            | c.671del            | p.(Thr224AArgfs*17)      | 12           | c.1633A>T           | p.(Asn545Tyr)             | AR                   | AR                | Stargardt disease/cone-rod dystrophy |                          | Yes         |
| MD-0341 | STGD                | ABCA4 | NM_000350 | 9            | c.4519G>A           | p.(Gly1507Arg)           | 38           | c.5377G>A           | p.(Val1793Met)            | sporadic             | AR                | Stargardt disease/cone-rod dystrophy |                          | NA          |
| MD-0342 | STGD                | ABCA4 | NM_000350 | 30           | c.1222C>T           | p.(Arg408*)              | 23           | c.3386G>T           | p.(Arg1129Leu)            | sporadic             | AR                | Stargardt disease/cone-rod dystrophy |                          | NA          |
| MD-0345 | STGD                | ABCA4 | NM_000350 | 13           | c.1804C>T           | p.(Arg602Tyr)            | 23           | c.3386G>T           | p.(Arg1129Leu)            | sporadic             | AR                | Stargardt disease/cone-rod dystrophy |                          | NA          |
| MD-0349 | STGD                | ABCA4 | NM_000350 | 20           | c.2966T>C           | p.(Val989Ala)            | 27           | c.3988G>T           | p.(Glu1330*)              | sporadic             | AR                | Stargardt disease/cone-rod dystrophy |                          | Yes         |
| MD-0353 | STGD                | ABCA4 | NM_000350 | 15           | c.2285C>A           | p.(Ala762Glu)            | 45           | c.6179T>G           | p.(Leu2060Arg)            | AR                   | AR                | Stargardt disease/cone-rod dystrophy |                          | NA          |
| MD-0354 | STGD                | ABCA4 | NM_000350 | 8            | c.1025_1038del      | p.(Asp342Glyfs*6)        | 23           | c.3386G>T           | p.(Arg1129Leu)            | AR                   | AR                | Stargardt disease/cone-rod dystrophy |                          | Yes         |
| MD-0359 | STGD                | ABCA4 | NM_000350 | 23           | c.3386G>T           | p.(Arg1129Leu)           | 38           | c.5395A>G           | p.(Asn1799Asp)            | sporadic             | AR                | Stargardt disease/cone-rod dystrophy |                          | Yes         |
| MD-0360 | STGD                | ABCA4 | NM_000350 | IVS28        | c.4253+4C>T         | p.(Ile1377Hisfs*3)       | IVS28        | c.4253+4C>T         | p.(Ile1377Hisfs*3)        | sporadic             | AR                | Stargardt disease/cone-rod dystrophy |                          | Yes         |
| MD-0364 | STGD                | ABCA4 | NM_000350 | 22           | c.3210_3211dup      | p.(Ser1071Cysfs*14)      | 28           | c.4139C>T           | p.(Pro1380Leu)            | sporadic             | AR                | Stargardt disease/cone-rod dystrophy |                          | Yes         |
| MD-0370 | STGD                | ABCA4 | NM_000350 | 21           | c.3056C>T           | p.(Thr1019Met)           | 23           | c.3386G>T           | p.(Arg1129Leu)            | sporadic             | AR                | Stargardt disease/cone-rod dystrophy |                          | Yes         |
| MD-0373 | STGD                | ABCA4 | NM_000350 | 16           | c.2401G>A           | p.(Ala801Thr)            | 23           | c.3364G>A           | p.(Thr1122Lys)            | AR                   | AR                | Stargardt disease/cone-rod dystrophy |                          | Yes         |
| MD-0388 | STGD                | ABCA4 | NM_000350 | 45           | c.6230G>A           | p.(Arg2077Gln)           | 47           | c.6449G>A           | p.(Cys2150Tyr)            | sporadic             | AR                | Stargardt disease/cone-rod dystrophy |                          | NA          |
| MD-0390 | CCRD                | ABCA4 | NM_000350 | 19           | c.2888del           | p.(Gly963Alafs*14)       | 23           | c.3386G>T           | p.(Arg1129Leu)            | sporadic             | AR                | Stargardt disease/cone-rod dystrophy |                          | NA          |
| MD-0392 | CCRD                | ABCA4 | NM_000350 | 46           | c.6320G>C           | p.(Arg2107Pro)           | 43           | c.6320G>C           | p.(Arg2107Pro)            | sporadic             | AR                | Stargardt disease/cone-rod dystrophy |                          | Yes         |
| MD-0394 | STGD                | ABCA4 | NM_000350 | 5            | c.454C>T            | p.(Arg152*)              | 14           | c.2023G>A           | p.(Val675Ile)             | AR                   | AR                | Stargardt disease/cone-rod dystrophy |                          | Yes         |
| MD-0395 | STGD                | ABCA4 | NM_000350 | 8            | c.950del            | p.(Gly317Alafs*57)       | 23           | c.3386G>T           | p.(Arg1129Leu)            | sporadic             | AR                | Stargardt disease/cone-rod dystrophy |                          | NA          |
| MD-0400 | STGD                | ABCA4 | NM_000350 | 38           | c.5451G>T           | p.(Glu1817Asp)           | 38           | c.5451G>T           | p.(Glu1817Asp)            | sporadic             | AR                | Stargardt disease/cone-rod dystrophy |                          | NA          |
| MD-0401 | STGD                | ABCA4 | NM_000350 | 19           | c.2791G>A           | p.(Val9931Met)           | 11Del        | c.1357_1554del      | p.(Asp453_Glu518del)      | sporadic             | AR                | Stargardt disease/cone-rod dystrophy |                          | NA          |
| MD-0402 | STGD                | ABCA4 | NM_000350 | 12,21        | c.[1622T>C;3113C>T] | p.[Leu541Pro;Ala1038Val] | 23           | c.3386G>T           | p.(Arg1129Leu)            | AR                   | AR                | Stargardt disease/cone-rod dystrophy |                          | Yes         |
| MD-0408 | STGD                | ABCA4 | NM_000350 | 41           | c.5819T>C           | p.(Leu1940Pro)           | 47           | c.6449G>A           | p.(Cys2150Tyr)            | AR                   | AR                | Stargardt disease/cone-rod dystrophy |                          | NA          |
| MD-0410 | STGD                | ABCA4 | NM_000350 | 23           | c.3386G>T           | p.(Arg1129Leu)           | 23           | c.3386G>T           | p.(Arg1129Leu)            | sporadic             | AR                | Stargardt disease/cone-rod dystrophy |                          | Yes         |

**Table S2. Description of genetics and clinical findings in 677 characterized *a priori* ar/SMD families. Novel variants are highlighted in gray.**

| Family  | Suspected diagnosis | Gene  | RefSeq_NM | Allele1_exon | Allele1_cDNA            | Allele1_protein                | Allele2_exon | Allele2_cDNA        | Allele2_protein           | Inheritance a priori | Final inheritance | Clinical reclassification            | Genetic reclassification comments | Segregation |
|---------|---------------------|-------|-----------|--------------|-------------------------|--------------------------------|--------------|---------------------|---------------------------|----------------------|-------------------|--------------------------------------|-----------------------------------|-------------|
| MD-0414 | STGD                | ABCA4 | NM_000350 | 21           | c.3113C>T               | p.(Ala1038Val)                 | 35           | c.4918C>T           | p.(Arg1640Trp)            | AR                   | AR                | Stargardt disease/cone-rod dystrophy |                                   | Yes         |
| MD-0416 | STGD                | ABCA4 | NM_000350 | 41           | c.5819T>C               | p.(Leu1940Pro)                 | 42           | c.5882G>A           | p.(Gly1961Glu)            | sporadic             | AR                | Stargardt disease/cone-rod dystrophy |                                   | NA          |
| MD-0420 | STGD                | ABCA4 | NM_000350 | 22           | c.3210_3211dup          | p.(Ser10711Cysfs*14)           | 48           | c.8563T>C           | p.(Phe2188Ser)            | sporadic             | AR                | Stargardt disease/cone-rod dystrophy |                                   | Yes         |
| MD-0423 | STGD                | ABCA4 | NM_000350 | IVS28        | c.4253+4C>T             | p.(Ile1377Hisfs*3)             | IVS30        | c.4539+2064C>T      | p.[=Arg1514Leufs*36]      | sporadic             | AR                | Stargardt disease/cone-rod dystrophy |                                   | Yes         |
| MD-0427 | STGD                | ABCA4 | NM_000350 | 13           | c.1832T>C               | p.(Leu611Pro)                  | 23           | c.3386G>T           | p.(Arg129Leu)             | sporadic             | AR                | Stargardt disease/cone-rod dystrophy |                                   | Yes         |
| MD-0428 | STGD                | ABCA4 | NM_000350 | 23           | c.3386G>T               | p.(Arg129Leu)                  | 43           | c.5929G>T           | p.(Gly1977Ser)            | AR                   | AR                | Stargardt disease/cone-rod dystrophy |                                   | NA          |
| MD-0431 | STGD                | ABCA4 | NM_000350 | 22           | c.3210_3211dup          | p.(Ser10711Cysfs*14)           | 30           | c.4457C>T           | p.(Pro1486Leu)            | sporadic             | AR                | Stargardt disease/cone-rod dystrophy |                                   | NA          |
| MD-0432 | STGD                | ABCA4 | NM_000350 | 5/22         | c.[560G>A,3210_3211dup] | p.[Arg187His;Ser10711Cysfs*14] | 14           | c.2041C>T           | p.(Arg681*)               | sporadic             | AR                | Stargardt disease/cone-rod dystrophy |                                   | NA          |
| MD-0433 | STGD                | ABCA4 | NM_000350 | 23           | c.3386G>T               | p.(Arg129Leu)                  | 30           | c.4457C>T           | p.(Pro1486Leu)            | sporadic             | AR                | Stargardt disease/cone-rod dystrophy |                                   | NA          |
| MD-0435 | STGD                | ABCA4 | NM_000350 | 12           | c.1609C>T               | p.(Arg537Cys)                  | 23           | c.3386G>T           | p.(Arg129Leu)             | sporadic             | AR                | Stargardt disease/cone-rod dystrophy |                                   | NA          |
| MD-0437 | STGD                | ABCA4 | NM_000350 | 6            | c.634C>T                | p.(Arg212Cys)                  | 23           | c.3386G>T           | p.(Arg129Leu)             | sporadic             | AR                | Stargardt disease/cone-rod dystrophy |                                   | Yes         |
| MD-0439 | STGD                | ABCA4 | NM_000350 | 8            | c.871C>G                | p.(Pro291Ala)                  | 23           | c.3364G>A           | p.(Glu1122Lys)            | sporadic             | AR                | Stargardt disease/cone-rod dystrophy |                                   | NA          |
| MD-0445 | STGD                | ABCA4 | NM_000350 | 19           | c.2888del               | p.(Gly963Alafs*14)             | 23           | c.3386G>T           | p.(Arg129Leu)             | AR                   | AR                | Stargardt disease/cone-rod dystrophy |                                   | Yes         |
| MD-0450 | STGD                | ABCA4 | NM_000350 | 8            | c.1025_1038del          | p.(Asp342Glyfs*6)              | 42           | c.5882G>A           | p.(Gly1961Glu)            | sporadic             | AR                | Stargardt disease/cone-rod dystrophy |                                   | Yes         |
| MD-0451 | CCRD                | ABCA4 | NM_000350 | IVS15        | c.2382+5G>C             | p.[=His721_Val794del]          | 23           | c.3386G>T           | p.(Arg129Leu)             | sporadic             | AR                | Stargardt disease/cone-rod dystrophy |                                   | Yes         |
| MD-0452 | STGD                | ABCA4 | NM_000350 | 23           | c.3386G>T               | p.(Arg129Leu)                  | 45           | c.6229C>T           | p.(Arg2077Tyr)            | AR                   | AR                | Stargardt disease/cone-rod dystrophy |                                   | Yes         |
| MD-0456 | STGD                | ABCA4 | NM_000350 | 13/29        | c.[1819G>A,4283C>T]     | p.[Gly607Arg;Thr1428Met]       | 41           | c.5761G>A           | p.(Val1921Met)            | AR                   | AR                | Stargardt disease/cone-rod dystrophy |                                   | NA          |
| MD-0460 | STGD                | ABCA4 | NM_000350 | IVS36        | c.5196+1137G>A          | p.[Met1733Glnfs*78;=]          | Ex6-IVS6     | c.699_768-341del    | p.(Gln234Phefs*5)         | sporadic             | AR                | Stargardt disease/cone-rod dystrophy |                                   | NA          |
| MD-0463 | STGD                | ABCA4 | NM_000350 | 8            | c.1035T>G               | p.(Tyr345*)                    | 22           | c.3210_3211dup      | p.(Ser10711Cysfs*14)      | sporadic             | AR                | Stargardt disease/cone-rod dystrophy |                                   | Yes         |
| MD-0464 | STGD                | ABCA4 | NM_000350 | 17           | c.2589G>C               | p.[Gly863Ala,Gly863del]        | IVS44        | c.6147+2T>A         | p.?                       | sporadic             | AR                | Stargardt disease/cone-rod dystrophy |                                   | Yes         |
| MD-0465 | STGD                | ABCA4 | NM_000350 | 23           | c.3386G>T               | p.(Arg129Leu)                  | IVS40        | c.5714+5G>A         | p.[=Glu1863Leufs*33]      | sporadic             | AR                | Stargardt disease/cone-rod dystrophy |                                   | NA          |
| MD-0466 | STGD                | ABCA4 | NM_000350 | 22           | c.3210_3211dup          | p.(Ser10711Cysfs*14)           | 23           | c.3386G>T           | p.(Arg129Leu)             | sporadic             | AR                | Stargardt disease/cone-rod dystrophy |                                   | Yes         |
| MD-0467 | CCRD                | ABCA4 | NM_000350 | 12           | c.1622T>C               | p.(Leu541Pro)                  | 43           | c.5917del           | p.(Leu1973*)              | sporadic             | AR                | Stargardt disease/cone-rod dystrophy |                                   | NA          |
| MD-0474 | STGD                | ABCA4 | NM_000350 | 12           | c.1622T>C               | p.(Leu541Pro)                  | 28           | c.4234C>T           | p.(Gln1412*)              | sporadic             | AR                | Stargardt disease/cone-rod dystrophy |                                   | Yes         |
| MD-0479 | STGD                | ABCA4 | NM_000350 | 12,12        | c.1751_1753delinsAT     | p.(Ile584Asnfs*65)             | 45           | c.6179T>G           | p.(Leu2060Arg)            | sporadic             | AR                | Stargardt disease/cone-rod dystrophy |                                   | Yes         |
| MD-0481 | STGD                | ABCA4 | NM_000350 | 23           | c.3386G>T               | p.(Arg129Leu)                  | 39/42        | c.[5512C>G,5882G>A] | p.[His1838Asp;Gly1961Glu] | sporadic             | AR                | Stargardt disease/cone-rod dystrophy |                                   | NA          |
| MD-0482 | STGD                | ABCA4 | NM_000350 | 14           | c.2057T>C               | p.(Leu686Ser)                  | 27           | c.4069G>A           | p.(Ala1357Thr)            | sporadic             | AR                | Stargardt disease/cone-rod dystrophy |                                   | NA          |
| MD-0486 | STGD                | ABCA4 | NM_000350 | 17           | c.2589G>C               | p.[Gly863Ala,Gly863del]        | 45           | c.6179T>G           | p.(Leu2060Arg)            | AR                   | AR                | Stargardt disease/cone-rod dystrophy |                                   | NA          |
| MD-0493 | STGD                | ABCA4 | NM_000350 | 30           | c.4457C>T               | p.(Pro1486Leu)                 | IVS30        | c.4539+2064C>T      | p.[=Arg1514Leufs*36]      | AR                   | AR                | Stargardt disease/cone-rod dystrophy |                                   | Yes         |
| MD-0494 | STGD                | ABCA4 | NM_000350 | 22/46        | c.[3322C>T,6320G>A]     | p.[Arg1108Cys;Arg2107His]      | 42           | c.5882G>A           | p.(Gly1961Glu)            | AR                   | AR                | Stargardt disease/cone-rod dystrophy |                                   | Yes         |
| MD-0497 | STGD                | ABCA4 | NM_000350 | 1            | c.52C>T                 | p.(Arg181Trp)                  | 23           | c.3386G>T           | p.(Arg129Leu)             | AR                   | AR                | Stargardt disease/cone-rod dystrophy |                                   | NA          |
| MD-0498 | STGD                | ABCA4 | NM_000350 | 14           | c.2041C>T               | p.(Arg681*)                    | 23           | c.3386G>T           | p.(Arg129Leu)             | sporadic             | AR                | Stargardt disease/cone-rod dystrophy |                                   | NA          |
| MD-0502 | CCRD                | ABCA4 | NM_000350 | 5            | c.560G>A                | p.(Arg178His)                  | 27           | c.3871C>T           | p.(Gln1291*)              | sporadic             | AR                | Stargardt disease/cone-rod dystrophy |                                   | Yes         |
| MD-0506 | STGD                | ABCA4 | NM_000350 | 22           | c.3292C>T               | p.(Arg1098Cys)                 | 35           | c.4919G>A           | p.(Arg1640Gln)            | sporadic             | AR                | Stargardt disease/cone-rod dystrophy |                                   | NA          |
| MD-0509 | STGD                | ABCA4 | NM_000350 | 17           | c.2588G>C               | p.[Gly863Ala,Gly863del]        | 44           | c.6118C>T           | p.(Arg2040*)              | sporadic             | AR                | Stargardt disease/cone-rod dystrophy |                                   | NA          |
| MD-0512 | STGD                | ABCA4 | NM_000350 | 30           | c.4537dup               | p.(Gln1513Profs*42)            | IVS40        | c.5714+5G>A         | p.[=Glu1863Leufs*33]      | sporadic             | AR                | Stargardt disease/cone-rod dystrophy |                                   | NA          |
| MD-0514 | STGD                | ABCA4 | NM_000350 | 22           | c.3323G>A               | p.(Arg1108His)                 | 36           | c.5044_5058del      | p.(Val11682_Val11686del)  | sporadic             | AR                | Stargardt disease/cone-rod dystrophy |                                   | Yes         |
| MD-0516 | STGD                | ABCA4 | NM_000350 | 36           | c.5044_5058del          | p.(Val11682_Val11686del)       | 36           | c.5044_5058del      | p.(Val11682_Val11686del)  | sporadic             | AR                | Stargardt disease/cone-rod dystrophy |                                   | Yes         |
| MD-0518 | STGD                | ABCA4 | NM_000350 | 6            | c.742_768+29del         | p.(Val248_Val256del)           | 23           | c.3386G>T           | p.(Arg129Leu)             | AR                   | AR                | Stargardt disease/cone-rod dystrophy |                                   | NA          |
| MD-0519 | STGD                | ABCA4 | NM_000350 | 23           | c.3386G>T               | p.(Arg129Leu)                  | 43           | c.5929G>T           | p.(Gly1977Ser)            | sporadic             | AR                | Stargardt disease/cone-rod dystrophy |                                   | Yes         |
| MD-0521 | STGD                | ABCA4 | NM_000350 | 22           | c.3210_3211dup          | p.(Ser10711Cysfs*14)           | 23           | c.3386G>T           | p.(Arg129Leu)             | sporadic             | AR                | Stargardt disease/cone-rod dystrophy |                                   | NA          |
| MD-0523 | STGD                | ABCA4 | NM_000350 | 41           | c.5819T>C               | p.(Leu1940Pro)                 | 42           | c.5882G>A           | p.(Gly1961Glu)            | AR                   | AR                | Stargardt disease/cone-rod dystrophy |                                   | NA          |
| MD-0524 | STGD                | ABCA4 | NM_000350 | 28/35        | c.[4222T>C,4918C>T]     | p.[Trp1408Arg;Arg1640Trp]      | 42           | c.5882G>A           | p.(Gly1961Glu)            | AR                   | AR                | Stargardt disease/cone-rod dystrophy |                                   | Yes         |
| MD-0528 | STGD                | ABCA4 | NM_000350 | 41           | c.5819T>C               | p.(Leu1940Pro)                 | 44           | c.6089G>A           | p.(Arg2030Gln)            | sporadic             | AR                | Stargardt disease/cone-rod dystrophy |                                   | Yes         |
| MD-0529 | STGD                | ABCA4 | NM_000350 | 39           | c.5531G>A               | p.(Gly1844Asp)                 | 42           | c.5882G>A           | p.(Gly1961Glu)            | sporadic             | AR                | Stargardt disease/cone-rod dystrophy |                                   | Yes         |
| MD-0530 | STGD                | ABCA4 | NM_000350 | 39           | c.5512C>G               | p.(His1838Asp)                 | 42           | c.5882G>A           | p.(Gly1961Glu)            | sporadic             | AR                | Stargardt disease/cone-rod dystrophy |                                   | NA          |
| MD-0534 | STGD                | ABCA4 | NM_000350 | IVS28        | c.4253+5G>A             | p.(Ile1377Hisfs*3)             | 48           | c.6718A>G           | p.(Thr2240Ala)            | sporadic             | AR                | Stargardt disease/cone-rod dystrophy |                                   | NA          |
| MD-0535 | STGD                | ABCA4 | NM_000350 | 5            | c.457A>T                | p.(Ile153Leu)                  | 35           | c.4918C>T           | p.(Arg1640Trp)            | sporadic             | AR                | Stargardt disease/cone-rod dystrophy |                                   | NA          |
| MD-0536 | STGD                | ABCA4 | NM_000350 | 21           | c.3113C>T               | p.(Ala1038Val)                 | IVS28        | c.4253+5G>A         | p.(Ile1377Hisfs*3)        | sporadic             | AR                | Stargardt disease/cone-rod dystrophy |                                   | NA          |
| MD-0537 | STGD                | ABCA4 | NM_000350 | 8            | c.1022A>T               | p.(Glu341Val)                  | 35           | c.4918C>T           | p.(Arg1640Trp)            | sporadic             | AR                | Stargardt disease/cone-rod dystrophy |                                   | Yes         |
| MD-0539 | STGD                | ABCA4 | NM_000350 | 13           | c.1804C>T               | p.(Arg602Trp)                  | 30           | c.4457C>T           | p.(Pro1486Leu)            | sporadic             | AR                | Stargardt disease/cone-rod dystrophy |                                   | NA          |
| MD-0544 | STGD                | ABCA4 | NM_000350 | 22           | c.3292C>T               | p.(Arg1098Cys)                 | IVS33        | c.4773+1G>T         | p.?                       | sporadic             | AR                | Stargardt disease/cone-rod dystrophy |                                   | NA          |
| MD-0545 | STGD                | ABCA4 | NM_000350 | 23           | c.3386G>T               | p.(Arg129Leu)                  | 46           | c.6329G>A           | p.(Trp2110*)              | sporadic             | AR                | Stargardt disease/cone-rod dystrophy |                                   | NA          |
| MD-0547 | STGD                | ABCA4 | NM_000350 | 23           | c.3386G>T               | p.(Arg129Leu)                  | 39/42        | c.[5512C>G,5882G>A] | p.[His1838Asp;Gly1961Glu] | sporadic             | AR                | Stargardt disease/cone-rod dystrophy |                                   | Yes         |
| MD-0548 | STGD                | ABCA4 | NM_000350 | 6            | c.634C>T                | p.(Arg212Cys)                  | 5/46         | c.6130C>T           | p.(Gln1204*)              | AR                   | AR                | Stargardt disease/cone-rod dystrophy |                                   | Yes         |
| MD-0553 | STGD                | ABCA4 | NM_000350 | 6            | c.735T>G                | p.(Tyr245*)                    | 44           | c.6089G>A           | p.(Arg2030Gln)            | sporadic             | AR                | Stargardt disease/cone-rod dystrophy |                                   | NA          |
| MD-0554 | CCRD                | ABCA4 | NM_000350 | 22           | c.3299T>C               | p.(Ile1100Thr)                 | 22           | c.3299T>C           | p.(Ile1100Thr)            | sporadic             | AR                | Stargardt disease/cone-rod dystrophy |                                   | NA          |
| MD-0555 | STGD                | ABCA4 | NM_000350 | 1/44         | c.[1A>G,6089G>A]        | p.[Met1733Gln;Arg2030Gln]      | 23           | c.3386G>T           | p.(Arg129Leu)             | sporadic             | AR                | Stargardt disease/cone-rod dystrophy |                                   | Yes         |
| MD-0556 | STGD                | ABCA4 | NM_000350 | 19           | c.2888del               | p.(Gly963Alafs*14)             | 23           | c.3386G>T           | p.(Arg129Leu)             | sporadic             | AR                | Stargardt disease/cone-rod dystrophy |                                   | NA          |
| MD-0558 | STGD                | ABCA4 | NM_000350 | 23           | c.3386G>T               | p.(Arg129Leu)                  | 23           | c.3386G>T           | p.(Arg129Leu)             | sporadic             | AR                | Stargardt disease/cone-rod dystrophy |                                   | NA          |
| MD-0559 | STGD                | ABCA4 | NM_000350 | 35           | c.4919G>A               | p.(Arg1640Gln)                 | 41           | c.5819T>C           | p.(Leu1940Pro)            | sporadic             | AR                | Stargardt disease/cone-rod dystrophy |                                   | Yes         |
| MD-0560 | STGD                | ABCA4 | NM_000350 | 23           | c.3386G>T               | p.(Arg129Leu)                  | 47           | c.8410G>A           | p.(Cys2137Tyr)            | AR                   | AR                | Stargardt disease/cone-rod dystrophy |                                   | Yes         |
| MD-0563 | STGD                | ABCA4 | NM_000350 | 23           | c.3386G>A               | p.(Glu1122Lys)                 | 23           | c.3386G>T           | p.(Arg129Leu)             | sporadic             | AR                | Stargardt disease/cone-rod dystrophy |                                   | Yes         |
| MD-0565 | CCRD                | ABCA4 | NM_000350 | 23           | c.3380G>A               | p.(Gly1127Glu)                 | 41           | c.5819T>C           | p.(Leu1940Pro)            | AR                   | AR                | Stargardt disease/cone-rod dystrophy |                                   | NA          |
| MD-0568 | STGD                | ABCA4 | NM_000350 | IVS47        | c.6480-1G>T             | p.?                            | 40           | c.5603A>T           | p.(Asn1888Ile)            | sporadic             | AR                | Stargardt disease/cone-rod dystrophy |                                   | NA          |
| MD-0571 | STGD                | ABCA4 | NM_000350 | 23           | c.3409A>G               | p.(Arg1137Gly)                 | IVS38        | c.5481-10T>C        | p.(Thr1821Aspfs*6)        | AR                   | AR                | Stargardt disease/cone-rod dystrophy |                                   | Yes         |
| MD-0572 | STGD                | ABCA4 | NM_000350 | 23           | c.3386G>T               | p.(Arg129Leu)                  | 40           | c.5655del           | p.(Val1887Trpfs*6)        | AR                   | AR                | Stargardt disease/cone-rod dystrophy |                                   | NA          |
| MD-0577 | STGD                | ABCA4 | NM_000350 | 23           | c.3386G>T               | p.(Arg129Leu)                  | 43           | c.5929G>T           | p.(Gly1977Ser)            | sporadic             | AR                | Stargardt disease/cone-rod dystrophy |                                   | Yes         |
| MD-0578 | STGD                | ABCA4 | NM_000350 | 13           | c.1804C>T               | p.(Arg602Trp)                  | 23           | c.3386G>T           | p.(Arg129Leu)             | sporadic             | AR                | Stargardt disease/cone-rod dystrophy |                                   | Yes         |
| MD-0580 | STGD                | ABCA4 | NM_000350 | 26           | c.3832G>T               | p.(Glu1278*)                   | 42           | c.5882G>A           | p.(Gly1961Glu)            | sporadic             | AR                | Stargardt disease/cone-rod dystrophy |                                   | NA          |
| MD-0581 | STGD                | ABCA4 | NM_000350 | IVS32        | c.4668-1G>A             | p.?                            | 42           | c.5882G>A           | p.(Gly1961Glu)            | AR                   | AR                | Stargardt disease/cone-rod dystrophy |                                   | Yes         |
| MD-0582 | STGD                | ABCA4 | NM_000350 | 34           | c.4793C>A               | p.(Ala1598Asp)                 | 41           | c.5819T>C           | p.(Leu1940Pro)            | sporadic             | AR                | Stargardt disease/cone-rod dystrophy |                                   | NA          |
| MD-0583 | STGD                | ABCA4 | NM_000350 | 23           | c.3386G>T               | p.(Arg1129Leu)                 | 42           | c.5858del           | p.(Pro1953Glnfs*21)       | sporadic             | AR                | Stargardt disease/cone-rod dystrophy |                                   | NA          |

Abbreviations: AR: autosomal recessive; AD: autosomal dominant; CCRD, cone and cone-rod dystrophies; IVS, intron; NA, not available; STGD, Stargardt disease; otherMD, other maculopathies; XL: X-linked

Table S2. Description of genetics and clinical findings in 677 characterized *a priori* ar/SMD families. Novel variants are highlighted in gray.

| Family  | Suspected diagnosis | Gene  | RefSeq_NM | Allele1_exon | Allele1_cDNA          | Allele1_protein                         | Allele2_exon | Allele2_cDNA             | Allele2_protein                   | Inheritance <i>a priori</i> | Final inheritance | Clinical reclassification            | Genetic reclassification comments | Segregation |
|---------|---------------------|-------|-----------|--------------|-----------------------|-----------------------------------------|--------------|--------------------------|-----------------------------------|-----------------------------|-------------------|--------------------------------------|-----------------------------------|-------------|
| MD-0585 | STGD                | ABCA4 | NM_000350 | 13           | c.1786G>A             | p.(Trp589*)                             | 23           | c.3386G>T                | p.(Arg1129Leu)                    | AR                          | AR                | Stargardt disease/cone-rod dystrophy |                                   | NA          |
| MD-0588 | STGD                | ABCA4 | NM_000350 | 22           | c.3323G>A             | p.(Arg1108His)                          | IVS26        | c.3862+1G>A              | p.?                               | sporadic                    | AR                | Stargardt disease/cone-rod dystrophy |                                   | NA          |
| MD-0589 | STGD                | ABCA4 | NM_000350 | 23           | c.3386G>T             | p.(Pro1486Leu)                          | 35;36        | c.[4926C>G;5044_5058del] | p.[Ser1642Arg;Val1681_Cys1685del] | sporadic                    | AR                | Stargardt disease/cone-rod dystrophy |                                   | NA          |
| MD-0590 | STGD                | ABCA4 | NM_000350 | 27           | c.4003_4004del        | p.(Pro1335Argfs*86)                     | 42           | c.5882G>A                | p.(Gly1961Glu)                    | sporadic                    | AR                | Stargardt disease/cone-rod dystrophy |                                   | NA          |
| MD-0595 | STGD                | ABCA4 | NM_000350 | 31           | c.4574A>G             | p.(Thr1526Ala)                          | IVS44        | c.6147+2T>A              | p.?                               | AR                          | AR                | Stargardt disease/cone-rod dystrophy |                                   | NA          |
| MD-0597 | STGD                | ABCA4 | NM_000350 | 12           | c.1714C>T             | p.(Arg572)                              | 42           | c.5882G>A                | p.(Gly1961Glu)                    | sporadic                    | AR                | Stargardt disease/cone-rod dystrophy |                                   | Yes         |
| MD-0599 | CCRD                | ABCA4 | NM_000350 | 23           | c.3386G>T             | p.(Arg1129Leu)                          | IVS30        | c.4539+2084C>T           | p.[=;Arg1514Leufs*36]             | sporadic                    | AR                | Stargardt disease/cone-rod dystrophy |                                   | Yes         |
| MD-0600 | STGD                | ABCA4 | NM_000350 | 23           | c.3364G>A             | p.(Glu1122Lys)                          | 42           | c.5882G>A                | p.(Gly1961Glu)                    | AR                          | AR                | Stargardt disease/cone-rod dystrophy |                                   | Yes         |
| MD-0602 | STGD                | ABCA4 | NM_000350 | 30           | c.4457C>T             | p.(Pro1486Leu)                          | 46           | c.6320G>A                | p.(Arg2107His)                    | sporadic                    | AR                | Stargardt disease/cone-rod dystrophy |                                   | Yes         |
| MD-0604 | CCRD                | ABCA4 | NM_000350 | 4            | c.3938del             | p.(Leu132Cysfs*22)                      | 19           | c.2888del                | p.(Gly963Alafs*14)                | sporadic                    | AR                | Stargardt disease/cone-rod dystrophy |                                   | Yes         |
| MD-0605 | STGD                | ABCA4 | NM_000350 | IVS38        | c.5461-10T>C          | p.(Thr1821Aspfs*6)                      | IVS38        | c.5461-10T>C             | p.(Thr1821Aspfs*6)                | sporadic                    | AR                | Stargardt disease/cone-rod dystrophy |                                   | NA          |
| MD-0607 | STGD                | ABCA4 | NM_000350 | 23           | c.3386G>T             | p.(Arg1129Leu)                          | 43           | c.5829G>A                | p.(Gly1977Ser)                    | sporadic                    | AR                | Stargardt disease/cone-rod dystrophy |                                   | NA          |
| MD-0611 | STGD                | ABCA4 | NM_000350 | 3            | c.184C>G              | p.(Pro242Ala)                           | 13           | c.1933G>A                | p.(Asp645Asn)                     | AR                          | AR                | Stargardt disease/cone-rod dystrophy |                                   | NA          |
| MD-0617 | STGD                | ABCA4 | NM_000350 | IVS38        | c.5461-10T>C          | p.(Thr1821Aspfs*6)                      | 46           | c.6320G>A                | p.(Arg2107His)                    | sporadic                    | AR                | Stargardt disease/cone-rod dystrophy |                                   | Yes         |
| MD-0619 | STGD                | ABCA4 | NM_000350 | 15           | c.2300T>A             | p.(Val767Asp)                           | 42           | c.5882G>A                | p.(Gly1961Glu)                    | sporadic                    | AR                | Stargardt disease/cone-rod dystrophy |                                   | Yes         |
| MD-0621 | STGD                | ABCA4 | NM_000350 | 23           | c.3386G>T             | p.(Arg1129Leu)                          | IVS19        | c.2919-826T>A            | p.(Leu973Phefs*11)                | sporadic                    | AR                | Stargardt disease/cone-rod dystrophy |                                   | Yes         |
| MD-0622 | STGD                | ABCA4 | NM_000350 | 30           | c.4457C>T             | p.(Pro1486Leu)                          | IVS38        | c.5461-10T>C             | p.(Thr1821Aspfs*6)                | sporadic                    | AR                | Stargardt disease/cone-rod dystrophy |                                   | NA          |
| MD-0625 | STGD                | ABCA4 | NM_000350 | 42           | c.5882G>A             | p.(Gly1961Glu)                          | 45           | c.6179T>G                | p.(Leu2060Arg)                    | sporadic                    | AR                | Stargardt disease/cone-rod dystrophy |                                   | Yes         |
| MD-0626 | CCRD                | ABCA4 | NM_000350 | 23           | c.3386G>T             | p.(Arg1129Leu)                          | 44           | c.6088C>T                | p.(Arg2030*)                      | sporadic                    | AR                | Stargardt disease/cone-rod dystrophy |                                   | NA          |
| MD-0631 | STGD                | ABCA4 | NM_000350 | 8            | c.982G>T              | p.(Glu328*)                             | 30           | c.4457C>T                | p.(Pro1486Leu)                    | sporadic                    | AR                | Stargardt disease/cone-rod dystrophy |                                   | Yes         |
| MD-0632 | STGD                | ABCA4 | NM_000350 | 6            | c.634C>T              | p.(Arg212Cys)                           | 23           | c.3386G>T                | p.(Arg1129Leu)                    | sporadic                    | AR                | Stargardt disease/cone-rod dystrophy |                                   | Yes         |
| MD-0635 | STGD                | ABCA4 | NM_000350 | 23           | c.3386G>T             | p.(Arg1129Leu)                          | 35           | c.4918C>T                | p.(Arg1640Trp)                    | AR                          | AR                | Stargardt disease/cone-rod dystrophy |                                   | Yes         |
| MD-0640 | CCRD                | ABCA4 | NM_000350 | 45           | c.6179T>G             | p.(Leu2060Arg)                          | 45           | c.6179T>G                | p.(Leu2060Arg)                    | AR                          | AR                | Stargardt disease/cone-rod dystrophy |                                   | NA          |
| MD-0653 | STGD                | ABCA4 | NM_000350 | 14           | c.2057T>C             | p.(Leu686Ser)                           | 40           | c.5603A>G                | p.(Asn1868Ile)                    | sporadic                    | AR                | Stargardt disease/cone-rod dystrophy |                                   | NA          |
| MD-0658 | STGD                | ABCA4 | NM_000350 | 45           | c.6179T>G             | p.(Leu2060Arg)                          | 45           | c.6179T>G                | p.(Leu2060Arg)                    | sporadic                    | AR                | Stargardt disease/cone-rod dystrophy |                                   | NA          |
| MD-0663 | STGD                | ABCA4 | NM_000350 | 23           | c.3386G>T             | p.(Arg1129Leu)                          | 27           | c.3898C>T                | p.(Arg1300*)                      | sporadic                    | AR                | Stargardt disease/cone-rod dystrophy |                                   | Yes         |
| MD-0675 | STGD                | ABCA4 | NM_000350 | 23           | c.3386G>T             | p.(Arg1129Leu)                          | 23;48        | c.[3386G>T;6178A>G]      | p.[Arg1129Leu;Thr2240Ala]         | sporadic                    | AR                | Stargardt disease/cone-rod dystrophy |                                   | NA          |
| MD-0683 | STGD                | ABCA4 | NM_000350 | 41           | c.5819T>C             | p.(Leu1940Pro)                          | 47           | c.6449G>A                | p.(Cys2150Tyr)                    | AR                          | AR                | Stargardt disease/cone-rod dystrophy |                                   | Yes         |
| MD-0691 | CCRD                | ABCA4 | NM_000350 | 8            | c.871C>G              | p.(Pro291Ala)                           | 13           | c.1804C>T                | p.(Arg802Trp)                     | sporadic                    | AR                | Stargardt disease/cone-rod dystrophy |                                   | Yes         |
| MD-0692 | STGD                | ABCA4 | NM_000350 | 12           | c.1751_1753delinsAT   | p.(Ile584Asnfs*65)                      | 42           | c.5882G>A                | p.(Gly1961Glu)                    | sporadic                    | AR                | Stargardt disease/cone-rod dystrophy |                                   | NA          |
| MD-0694 | CCRD                | ABCA4 | NM_000350 | 3            | c.287del              | p.(Asn96Thrfs*19)                       | 23;30        | c.[3386G>T;4537dup]      | p.[Arg1129Leu;Gln1513Profs*42]    | sporadic                    | AR                | Stargardt disease/cone-rod dystrophy |                                   | Yes         |
| MD-0696 | OtherMD             | ABCA4 | NM_000350 | 30           | c.4457C>T             | p.(Pro1486Leu)                          | 43           | c.5914G>A                | p.(Gly1972Arg)                    | sporadic                    | AR                | Stargardt disease/cone-rod dystrophy |                                   | NA          |
| MD-0698 | CCRD                | ABCA4 | NM_000350 | 13           | c.1755del             | p.(Lys585ysfs*63)                       | 42           | c.4457C>T                | p.(Pro1486Leu)                    | AR                          | AR                | Stargardt disease/cone-rod dystrophy |                                   | Yes         |
| MD-0701 | CCRD                | ABCA4 | NM_000350 | 42           | c.5882G>A             | p.(Gly1961Glu)                          | IVS46        | c.6387-1G>A              | p.?                               | AR                          | AR                | Stargardt disease/cone-rod dystrophy |                                   | Yes         |
| MD-0704 | CCRD                | ABCA4 | NM_000350 | 16           | c.2481del             | p.(Thr829Argfs*14)                      | 46           | c.6179T>G                | p.(Leu2060Arg)                    | sporadic                    | AR                | Stargardt disease/cone-rod dystrophy |                                   | NA          |
| MD-0714 | STGD                | ABCA4 | NM_000350 | 23           | c.3386G>T             | p.(Arg1129Leu)                          | 23           | c.3386G>T                | p.(Arg1129Leu)                    | sporadic                    | AR                | Stargardt disease/cone-rod dystrophy |                                   | Yes         |
| MD-0716 | STGD                | ABCA4 | NM_000350 | IVS40        | c.5714+5G>A           | p.[=;Glu1863Leufs*33]                   | 42;45        | c.[5843C>T;6179T>G]      | p.[Pro1948Leu;Leu2060Arg]         | AR                          | AR                | Stargardt disease/cone-rod dystrophy |                                   | Yes         |
| MD-0717 | STGD                | ABCA4 | NM_000350 | 14           | c.2041C>T             | p.(Arg681*)                             | 48           | c.6178A>G                | p.(Thr2240Ala)                    | sporadic                    | AR                | Stargardt disease/cone-rod dystrophy |                                   | NA          |
| MD-0720 | STGD                | ABCA4 | NM_000350 | 23           | c.3386G>T             | p.(Arg1129Leu)                          | 23           | c.3386G>T                | p.(Arg1129Leu)                    | sporadic                    | AR                | Stargardt disease/cone-rod dystrophy |                                   | Yes         |
| MD-0723 | STGD                | ABCA4 | NM_000350 | 23           | c.3386G>T             | p.(Arg1129Leu)                          | 47           | c.6410G>A                | p.(Cys2137Tyr)                    | sporadic                    | AR                | Stargardt disease/cone-rod dystrophy |                                   | Yes         |
| MD-0724 | STGD                | ABCA4 | NM_000350 | 42           | c.5882G>A             | p.(Gly1961Glu)                          | 45           | c.6221G>A                | p.(Gly2074Asp)                    | sporadic                    | AR                | Stargardt disease/cone-rod dystrophy |                                   | Yes         |
| MD-0731 | OtherMD             | ABCA4 | NM_000350 | 13           | c.1819G>C             | p.(Gly607Arg)                           | 42           | c.5882G>A                | p.(Gly1961Glu)                    | sporadic                    | AR                | Stargardt disease/cone-rod dystrophy |                                   | NA          |
| MD-0736 | STGD                | ABCA4 | NM_000350 | 6            | c.634C>T              | p.(Arg212Cys)                           | 28           | c.4139C>T                | p.(Pro1380Leu)                    | AR                          | AR                | Stargardt disease/cone-rod dystrophy |                                   | Yes         |
| MD-0740 | STGD                | ABCA4 | NM_000350 | 47           | c.6410G>A             | p.(Cys2137Tyr)                          | IVS28        | c.4253+43G>A             | p.[=;Ile1377Hisfs*3]              | sporadic                    | AR                | Stargardt disease/cone-rod dystrophy |                                   | NA          |
| MD-0741 | STGD                | ABCA4 | NM_000350 | 23           | c.3386G>T             | p.(Arg1129Leu)                          | IVS38        | c.5461-10T>C             | p.(Thr1821Aspfs*6)                | sporadic                    | AR                | Stargardt disease/cone-rod dystrophy |                                   | NA          |
| MD-0742 | STGD                | ABCA4 | NM_000350 | IVS13        | c.1938-514A>G         | p.[Phe647Serfs*155;Phe647Serfs*22;=] ]] | 23           | c.3386G>T                | p.(Arg1129Leu)                    | sporadic                    | AR                | Stargardt disease/cone-rod dystrophy |                                   | Yes         |
| MD-0746 | STGD                | ABCA4 | NM_000350 | 14           | c.2041C>T             | p.(Arg681*)                             | 14           | c.2041C>T                | p.(Arg681*)                       | sporadic                    | AR                | Stargardt disease/cone-rod dystrophy |                                   | NA          |
| MD-0747 | CCRD                | ABCA4 | NM_000350 | 13           | c.1804C>T             | p.(Arg602Trp)                           | 35           | c.4849del                | p.[Val1617Cysfs*45]               | sporadic                    | AR                | Stargardt disease/cone-rod dystrophy |                                   | Yes         |
| MD-0748 | STGD                | ABCA4 | NM_000350 | 9            | c.1222C>T             | p.(Arg408*)                             | 42           | c.5882G>A                | p.(Gly1961Glu)                    | sporadic                    | AR                | Stargardt disease/cone-rod dystrophy |                                   | NA          |
| MD-0750 | STGD                | ABCA4 | NM_000350 | 12           | c.1751_1753delinsAT   | p.(Ile584Asnfs*65)                      | 42           | c.5882G>A                | p.(Gly1961Glu)                    | sporadic                    | AR                | Stargardt disease/cone-rod dystrophy |                                   | NA          |
| MD-0751 | STGD                | ABCA4 | NM_000350 | 19           | c.2888del             | p.(Gly963Alafs*14)                      | 23           | c.3386G>T                | p.(Arg1129Leu)                    | AR                          | AR                | Stargardt disease/cone-rod dystrophy |                                   | NA          |
| MD-0754 | CCRD                | ABCA4 | NM_000350 | 41           | c.5819T>C             | p.(Leu1940Pro)                          | 42           | c.5882G>A                | p.(Gly1961Glu)                    | sporadic                    | AR                | Stargardt disease/cone-rod dystrophy |                                   | NA          |
| MD-0759 | STGD                | ABCA4 | NM_000350 | 14           | c.2041C>T             | p.(Arg681*)                             | 42           | c.5882G>A                | p.(Gly1961Glu)                    | AR                          | AR                | Stargardt disease/cone-rod dystrophy |                                   | NA          |
| MD-0763 | STGD                | ABCA4 | NM_000350 | 12           | c.1667T>G             | p.(Met556Arg)                           | 23           | c.3386G>T                | p.(Arg1129Leu)                    | sporadic                    | AR                | Stargardt disease/cone-rod dystrophy |                                   | Yes         |
| MD-0765 | STGD                | ABCA4 | NM_000350 | 41           | c.5819T>C             | p.(Leu1940Pro)                          | 41           | c.5819T>C                | p.(Leu1940Pro)                    | sporadic                    | AR                | Stargardt disease/cone-rod dystrophy |                                   | NA          |
| MD-0768 | STGD                | ABCA4 | NM_000350 | 20;38        | c.[2971A>G;C;3899G>A] | p.[Gly991Arg;Arg1300Gln]                | 38           | c.5317_5318insA          | p.[Ala1773Aspfs*14]               | sporadic                    | AR                | Stargardt disease/cone-rod dystrophy |                                   | NA          |
| MD-0769 | STGD                | ABCA4 | NM_000350 | 14           | c.2023G>A             | p.(Val675Ile)                           | 16           | c.2488G>T                | p.(Glu830*)                       | sporadic                    | AR                | Stargardt disease/cone-rod dystrophy |                                   | NA          |
| MD-0770 | CCRD                | ABCA4 | NM_000350 | 19           | c.2888del             | p.(Gly963Alafs*14)                      | 30           | c.4537dup                | p.(Gln1513Profs*42)               | sporadic                    | AR                | Stargardt disease/cone-rod dystrophy |                                   | Yes         |
| MD-0771 | STGD                | ABCA4 | NM_000350 | 15           | c.2285C>A             | p.(Ala762Glu)                           | 23           | c.3386G>T                | p.(Arg1129Leu)                    | sporadic                    | AR                | Stargardt disease/cone-rod dystrophy |                                   | Yes         |
| MD-0778 | STGD                | ABCA4 | NM_000350 | 34           | c.4793C>A             | p.(Ala1598Asp)                          | 34           | c.4793C>A                | p.(Ala1598Asp)                    | AR                          | AR                | Stargardt disease/cone-rod dystrophy |                                   | Yes         |
| MD-0779 | STGD                | ABCA4 | NM_000350 | 21           | c.3056C>T             | p.(Thr1019Met)                          | IVS28        | c.4253+43G>A             | p.[=;Ile1377Hisfs*3]              | sporadic                    | AR                | Stargardt disease/cone-rod dystrophy |                                   | NA          |
| MD-0780 | STGD                | ABCA4 | NM_000350 | 8            | c.982G>T              | p.(Glu328*)                             | 39           | c.5549T>C                | p.(Leu1850Pro)                    | AR                          | AR                | Stargardt disease/cone-rod dystrophy |                                   | Yes         |
| MD-0781 | STGD                | ABCA4 | NM_000350 | 13           | c.1804C>T             | p.(Arg602Trp)                           | 13           | c.1804C>T                | p.(Arg602Trp)                     | AR                          | AR                | Stargardt disease/cone-rod dystrophy |                                   | NA          |
| MD-0783 | STGD                | ABCA4 | NM_000350 | IVS30;42     | c.[4540-8T>C;5882G>A] | p.[Gln1513insPro;Gln1961Glu]            | 8            | c.950del                 | p.(Gly317Alafs*57)                | sporadic                    | AR                | Stargardt disease/cone-rod dystrophy |                                   | Yes         |
| MD-0787 | STGD                | ABCA4 | NM_000350 | 43           | c.5917del             | p.(Val1973*)                            | 43           | c.5917del                | p.(Val1973*)                      | sporadic                    | AR                | Stargardt disease/cone-rod dystrophy |                                   | NA          |
| MD-0790 | STGD                | ABCA4 | NM_000350 | 12           | c.1715G>C             | p.(Arg572Pro)                           | 35           | c.4918C>T                | p.(Arg1640Trp)                    | sporadic                    | AR                | Stargardt disease/cone-rod dystrophy |                                   | Yes         |
| MD-0791 | STGD                | ABCA4 | NM_000350 | 22;46        | c.[3322C>T;6320G>A]   | p.[Arg1108Cys;Arg2107His]               | 23           | c.3386G>T                | p.(Arg1129Leu)                    | sporadic                    | AR                | Stargardt disease/cone-rod dystrophy |                                   | NA          |
| MD-0793 | STGD                | ABCA4 | NM_000350 | 21           | c.3113C>T             | p.(Ala1038Val)                          | 36           | c.5172G>T                | p.(Trp1724Cys)                    | unknown                     | AR                | Stargardt disease/cone-rod dystrophy |                                   | NA          |
| MD-0794 | STGD                | ABCA4 | NM_000350 | 23           | c.3386G>T             | p.(Arg1129Leu)                          | 27           | c.3386G>T                | p.(Glu1330*)                      | sporadic                    | AR                | Stargardt disease/cone-rod dystrophy |                                   | Yes         |
| MD-0797 | STGD                | ABCA4 | NM_000350 | 19           | c.2888del             | p.(Gly963Alafs*14)                      | 23           | c.3386G>T                | p.(Arg1129Leu)                    | sporadic                    | AR                | Stargardt disease/cone-rod dystrophy |                                   | NA          |
| MD-0799 | STGD                | ABCA4 | NM_000350 | 43           | c.5929G>A             | p.(Gly1977Ser)                          | IVS28        | c.4253+43G>A             | p.[=;Ile1377Hisfs*3]              | sporadic                    | AR                | Stargardt disease/cone-rod dystrophy |                                   | NA          |
| MD-0807 |                     |       |           |              |                       |                                         |              |                          |                                   |                             |                   |                                      |                                   |             |

Table S2. Description of genetics and clinical findings in 677 characterized *a priori* ar/SMD families. Novel variants are highlighted in gray.

| Family  | Suspected diagnosis | Gene  | RefSeq_NM | Allele1_exon | Allele1_cDNA             | Allele1_protein                    | Allele2_exon | Allele2_cDNA           | Allele2_protein               | Inheritance a priori | Final inheritance | Clinical reclassification            | Genetic reclassification comments | Segregation |
|---------|---------------------|-------|-----------|--------------|--------------------------|------------------------------------|--------------|------------------------|-------------------------------|----------------------|-------------------|--------------------------------------|-----------------------------------|-------------|
| MD-0819 | STGD                | ABCA4 | NM_000350 | 23           | c.3386G>T                | p.(Arg1129Leu)                     | 43           | c.592G>A               | p.(Gly1977Ser)                | unknown              | AR                | Stargardt disease/cone-rod dystrophy |                                   | NA          |
| MD-0821 | STGD                | ABCA4 | NM_000350 | IVS28        | c.4253+4C>T              | p.(Ile1377Hisfs*3)                 | 42           | c.5882G>A              | p.(Gly1961Glu)                | sporadic             | AR                | Stargardt disease/cone-rod dystrophy |                                   | Yes         |
| MD-0822 | STGD                | ABCA4 | NM_000350 | 23           | c.3386G>T                | p.(Arg1129Leu)                     | 41           | c.5819T>C              | p.(Leu1940Pro)                | sporadic             | AR                | Stargardt disease/cone-rod dystrophy |                                   | NA          |
| MD-0826 | STGD                | ABCA4 | NM_000350 | 42           | c.5882G>A                | p.(Gly1961Glu)                     | IVS30        | c.4539+2064C>T         | p.(=Arg1514Leufs*36]          | AR                   | AR                | Stargardt disease/cone-rod dystrophy |                                   | NA          |
| MD-0829 | STGD                | ABCA4 | NM_000350 | 14           | c.1957G>A                | p.(Arg653Cys)                      | 23           | c.3386G>T              | p.(Arg1129Leu)                | AR                   | AR                | Stargardt disease/cone-rod dystrophy |                                   | NA          |
| MD-0832 | STGD                | ABCA4 | NM_000350 | 23           | c.3386G>T                | p.(Arg1129Leu)                     | 47           | c.8145C>T              | p.(Arg2139Tyr)                | sporadic             | AR                | Stargardt disease/cone-rod dystrophy |                                   | NA          |
| MD-0834 | STGD                | ABCA4 | NM_000350 | 13           | c.1804C>T                | p.(Arg602Tyr)                      | 23           | c.3386G>T              | p.(Arg1129Leu)                | sporadic             | AR                | Stargardt disease/cone-rod dystrophy |                                   | Yes         |
| MD-0847 | STGD                | ABCA4 | NM_000350 | 22,46        | c.[3322T>T.6320G>A]      | p.[Arg1108Cys;Arg2107His]          | 23           | c.3386G>T              | p.(Arg1129Leu)                | sporadic             | AR                | Stargardt disease/cone-rod dystrophy |                                   | Yes         |
| MD-0852 | STGD                | ABCA4 | NM_000350 | 27           | c.3874C>T                | p.(Gln1292*)                       | 21           | c.3113C>T              | p.(Ala1038Val)                | sporadic             | AR                | Stargardt disease/cone-rod dystrophy |                                   | NA          |
| MD-0853 | STGD                | ABCA4 | NM_000350 | 30           | c.4537dup                | p.(Gln1513Profs*42)                | 40           | c.5603A>T              | p.(Asn1868Ile)                | sporadic             | AR                | Stargardt disease/cone-rod dystrophy |                                   | NA          |
| MD-0855 | OtherMD             | ABCA4 | NM_000350 | 23           | c.3386G>T                | p.(Arg1129Leu)                     | 30           | c.4353-1G>A            | p.?                           | AR                   | AR                | Stargardt disease/cone-rod dystrophy |                                   | NA          |
| MD-0856 | STGD                | ABCA4 | NM_000350 | 42           | c.5882G>A                | p.(Gly1961Glu)                     | 43           | c.5917del              | p.(Val1973*)                  | sporadic             | AR                | Stargardt disease/cone-rod dystrophy |                                   | NA          |
| MD-0859 | STGD                | ABCA4 | NM_000350 | 6            | c.611C>A                 | p.(Ala204Asp)                      | 23           | c.3386G>T              | p.(Arg1129Leu)                | AR                   | AR                | Stargardt disease/cone-rod dystrophy |                                   | Yes         |
| MD-0863 | STGD                | ABCA4 | NM_000350 | IVS30        | c.4539+2064C>T           | p.(=Arg1514Leufs*36]               | 42           | c.5882G>A              | p.(Gly1961Glu)                | AR                   | AR                | Stargardt disease/cone-rod dystrophy |                                   | Yes         |
| MD-0864 | STGD                | ABCA4 | NM_000350 | 13           | c.1868A>G                | p.(Gln623Arg)                      | 22           | c.3259G>A              | p.(Glu108Tyr)                 | AR                   | AR                | Stargardt disease/cone-rod dystrophy |                                   | NA          |
| MD-0869 | CCRD                | ABCA4 | NM_000350 | 13           | c.1832T>C                | p.(Leu611Pro)                      | 23           | c.3386G>T              | p.(Arg1129Leu)                | sporadic             | AR                | Stargardt disease/cone-rod dystrophy |                                   | Yes         |
| MD-0870 | STGD                | ABCA4 | NM_000350 | 3            | c.223T>G                 | p.(Cys75Gly)                       | 23           | c.3386G>T              | p.(Arg1129Leu)                | sporadic             | AR                | Stargardt disease/cone-rod dystrophy |                                   | NA          |
| MD-0877 | STGD                | ABCA4 | NM_000350 | 13           | c.1804C>T                | p.(Arg602Tyr)                      | 42           | c.5882G>A              | p.(Gly1961Glu)                | sporadic             | AR                | Stargardt disease/cone-rod dystrophy |                                   | Yes         |
| MD-0878 | OtherMD             | ABCA4 | NM_000350 | 8            | c.982G>T                 | p.(Glu328*)                        | 8            | c.982G>T               | p.(Glu328*)                   | sporadic             | AR                | Stargardt disease/cone-rod dystrophy |                                   | Yes         |
| MD-0881 | STGD                | ABCA4 | NM_000350 | 23           | c.3386G>T                | p.(Arg1129Leu)                     | 44           | c.6089G>A              | p.(Arg2030Gln)                | sporadic             | AR                | Stargardt disease/cone-rod dystrophy |                                   | Yes         |
| MD-0882 | OtherMD             | ABCA4 | NM_000350 | IVS38        | c.5461-10T>C             | p.(Thr1821Aspfs*6)                 | IVS39        | c.5714+5G>A            | p.(=Glu1863Leufs*33]          | sporadic             | AR                | Stargardt disease/cone-rod dystrophy |                                   | Yes         |
| MD-0885 | STGD                | ABCA4 | NM_000350 | 13           | c.1804C>T                | p.(Arg602Tyr)                      | 46           | c.6316C>T              | p.(Arg2106Cys)                | sporadic             | AR                | Stargardt disease/cone-rod dystrophy |                                   | Yes         |
| MD-0886 | STGD                | ABCA4 | NM_000350 | 35,36        | c.[4926C>G.5044_5058del] | p.[Ser1642Arg;Val1682_Val1686del]  | 46           | c.6380C>T              | p.(Ser2127Phe)                | sporadic             | AR                | Stargardt disease/cone-rod dystrophy |                                   | Yes         |
| MD-0894 | CCRD                | ABCA4 | NM_000350 | 22           | c.3210_3211dup           | p.(Ser1071Cysfs*14)                | 22           | c.3210_3211dup         | p.(Ser1071Cysfs*14)           | sporadic             | AR                | Stargardt disease/cone-rod dystrophy |                                   | NA          |
| MD-0895 | STGD                | ABCA4 | NM_000350 | 23           | c.3364G>A                | p.(Glu1127Lys)                     | IVS28        | c.4253+43G>A           | p.(Ile1377Hisfs*3)            | sporadic             | AR                | Stargardt disease/cone-rod dystrophy |                                   | NA          |
| MD-0906 | STGD                | ABCA4 | NM_000350 | 13           | c.1804C>T                | p.(Arg602Tyr)                      | 23           | c.3364G>A              | p.(Glu1122Lys)                | AR                   | AR                | Stargardt disease/cone-rod dystrophy |                                   | Yes         |
| MD-0908 | STGD                | ABCA4 | NM_000350 | 8            | c.1025_1038del           | p.(Asp342Glyfs*6)                  | 23           | c.3386G>T              | p.(Arg1129Leu)                | AR                   | AR                | Stargardt disease/cone-rod dystrophy |                                   | Yes         |
| MD-0911 | STGD                | ABCA4 | NM_000350 | 13           | c.1879G>T                | p.(Glu827*)                        | 41           | c.5819T>C              | p.(Leu1940Pro)                | sporadic             | AR                | Stargardt disease/cone-rod dystrophy |                                   | Yes         |
| MD-0918 | STGD                | ABCA4 | NM_000350 | 44           | c.6088C>T                | p.(Arg2030*)                       | 45           | c.6216T>A              | p.(Ser2072Arg)                | AR                   | AR                | Stargardt disease/cone-rod dystrophy |                                   | NA          |
| MD-0925 | STGD                | ABCA4 | NM_000350 | 23           | c.3386G>T                | p.(Arg1129Leu)                     | 43           | c.5929G>A              | p.(Gly1977Ser)                | AR                   | AR                | Stargardt disease/cone-rod dystrophy |                                   | Yes         |
| MD-0929 | CCRD                | ABCA4 | NM_000350 | 36           | c.5044_5058del           | p.(Val1681_Cys1685del)             | 36           | c.5044_5058del         | p.(Val1682_Val1686del)        | sporadic             | AR                | Stargardt disease/cone-rod dystrophy |                                   | NA          |
| MD-0932 | STGD                | ABCA4 | NM_000350 | 28,35        | c.[4222T>C.4918C>T]      | p.[Trp1408Arg;Arg1640Trp]          | 42           | c.5882G>A              | p.(Gly1961Glu)                | sporadic             | AR                | Stargardt disease/cone-rod dystrophy |                                   | NA          |
| MD-0939 | STGD                | ABCA4 | NM_000350 | IVS36        | c.5196+1137G>A           | p.(Met1733Glnfs*78,=)              | IVS38        | c.5461-10T>C           | p.(Thr1821Aspfs*6)            | sporadic             | AR                | Stargardt disease/cone-rod dystrophy |                                   | NA          |
| MD-0941 | STGD                | ABCA4 | NM_000350 | 19           | c.2894A>G                | p.(Asn965Ser)                      | 45           | c.6272T>A              | p.(Leu2091Gln)                | sporadic             | AR                | Stargardt disease/cone-rod dystrophy |                                   | Yes         |
| MD-0943 | STGD                | ABCA4 | NM_000350 | 23           | c.3386G>T                | p.(Arg1129Leu)                     | 40           | c.5644A>G              | p.(Met1882Val)                | sporadic             | AR                | Stargardt disease/cone-rod dystrophy |                                   | NA          |
| MD-0945 | STGD                | ABCA4 | NM_000350 | 23           | c.3386G>T                | p.(Arg1129Leu)                     | IVS29        | c.4353-1G>A            | p.?                           | AR                   | AR                | Stargardt disease/cone-rod dystrophy |                                   | NA          |
| MD-0946 | STGD                | ABCA4 | NM_000350 | 23           | c.3386G>T                | p.(Arg1129Leu)                     | 29,48        | c.[3386G>T.6718A>G]    | p.[Arg1129Leu;Thr2240Ala]     | sporadic             | AR                | Stargardt disease/cone-rod dystrophy |                                   | NA          |
| MD-0952 | STGD                | ABCA4 | NM_000350 | 23           | c.3386G>T                | p.(Arg1129Leu)                     | 42           | c.5882G>A              | p.(Gly1961Glu)                | sporadic             | AR                | Stargardt disease/cone-rod dystrophy |                                   | NA          |
| MD-0953 | OtherMD             | ABCA4 | NM_000350 | 22           | c.3210_3211dup           | p.(Ser1071Cysfs*14)                | 23           | c.3386G>T              | p.(Arg1129Leu)                | sporadic             | AR                | Stargardt disease/cone-rod dystrophy |                                   | Yes         |
| MD-0954 | STGD                | ABCA4 | NM_000350 | 21           | c.3113C>T                | p.(Ala1038Val)                     | IVS21        | c.3050+5G>A            | p.(Leu973_His1017delinsPhe)   | sporadic             | AR                | Stargardt disease/cone-rod dystrophy |                                   | Yes         |
| MD-0955 | STGD                | ABCA4 | NM_000350 | 19           | c.2888del                | p.(Gly634Ilefs*14)                 | 23           | c.3386G>T              | p.(Arg1129Leu)                | AR                   | AR                | Stargardt disease/cone-rod dystrophy |                                   | NA          |
| MD-0956 | STGD                | ABCA4 | NM_000350 | 17,40        | c.[2588G>C.5603A>T]      | p.[Gly863Ala;Gly863del;Asn1868Ile] | IVS38:40     | c.[5461-10T>C.5603A>T] | p.[Thr1821Aspfs*6;Asn1868Ile] | sporadic             | AR                | Stargardt disease/cone-rod dystrophy |                                   | Yes         |
| MD-0959 | STGD                | ABCA4 | NM_000350 | 23           | c.3386G>T                | p.(Arg1129Leu)                     | 23           | c.3386G>T              | p.(Arg1129Leu)                | AR                   | AR                | Stargardt disease/cone-rod dystrophy |                                   | Yes         |
| MD-0960 | STGD                | ABCA4 | NM_000350 | 23           | c.3383A>G                | p.(Asp1128Gly)                     | 23           | c.3383A>G              | p.(Asp1128Gly)                | sporadic             | AR                | Stargardt disease/cone-rod dystrophy |                                   | Yes         |
| MD-0962 | STGD                | ABCA4 | NM_000350 | 29           | c.4254C>A                | p.(Ser1418Arg)                     | 29           | c.4254C>A              | p.(Ser1418Arg)                | sporadic             | AR                | Stargardt disease/cone-rod dystrophy |                                   | Yes         |
| MD-0963 | STGD                | ABCA4 | NM_000350 | 14           | c.2023G>A                | p.(Val675Ile)                      | 45           | c.6179T>G              | p.(Leu2060Arg)                | sporadic             | AR                | Stargardt disease/cone-rod dystrophy |                                   | Yes         |
| MD-0964 | STGD                | ABCA4 | NM_000350 | 15           | c.2285C>A                | p.(Ala762Glu)                      | 34           | c.4793C>A              | p.(Ala1598Asp)                | sporadic             | AR                | Stargardt disease/cone-rod dystrophy |                                   | NA          |
| MD-0966 | STGD                | ABCA4 | NM_000350 | 39           | c.5549T>C                | p.(Leu1850Pro)                     | 42           | c.5882G>A              | p.(Gly1961Glu)                | sporadic             | AR                | Stargardt disease/cone-rod dystrophy |                                   | Yes         |
| MD-0967 | STGD                | ABCA4 | NM_000350 | 6            | c.634C>C                 | p.(Arg212Cys)                      | IVS34        | c.4848+3A>G            | p.[Gly1592_Lys1616del=]       | AR                   | AR                | Stargardt disease/cone-rod dystrophy |                                   | Yes         |
| MD-0968 | STGD                | ABCA4 | NM_000350 | 23           | c.3386G>T                | p.(Arg1129Leu)                     | 27           | c.3988G>T              | p.(Glu1330*)                  | sporadic             | AR                | Stargardt disease/cone-rod dystrophy |                                   | Yes         |
| MD-0979 | STGD                | ABCA4 | NM_000350 | 23           | c.3386G>T                | p.(Arg1129Leu)                     | 27           | c.3943C>T              | p.(Gln1315*)                  | sporadic             | AR                | Stargardt disease/cone-rod dystrophy |                                   | Yes         |
| MD-0980 | STGD                | ABCA4 | NM_000350 | 45           | c.6179T>G                | p.(Leu2060Arg)                     | 48           | c.6718A>G              | p.(Trp2240Ala)                | sporadic             | AR                | Stargardt disease/cone-rod dystrophy |                                   | NA          |
| MD-0981 | STGD                | ABCA4 | NM_000350 | 13           | c.1804C>T                | p.(Arg602Tyr)                      | IVS30        | c.4539+2064C>T         | p.(=Arg1514Leufs*36]          | sporadic             | AR                | Stargardt disease/cone-rod dystrophy |                                   | NA          |
| MD-0984 | STGD                | ABCA4 | NM_000350 | 23           | c.3386G>T                | p.(Arg1129Leu)                     | 41           | c.5819T>C              | p.(Leu1940Pro)                | AR                   | AR                | Stargardt disease/cone-rod dystrophy |                                   | NA          |
| MD-0985 | STGD                | ABCA4 | NM_000350 | 13           | c.1768G>C                | p.(Trp589Ser)                      | 42           | c.5882G>A              | p.(Gly1961Glu)                | sporadic             | AR                | Stargardt disease/cone-rod dystrophy |                                   | NA          |
| MD-0989 | STGD                | ABCA4 | NM_000350 | 41           | c.5819T>C                | p.(Leu1940Pro)                     | 41           | c.5819T>C              | p.(Leu1940Pro)                | sporadic             | AR                | Stargardt disease/cone-rod dystrophy |                                   | NA          |
| MD-0991 | STGD                | ABCA4 | NM_000350 | 30           | c.4457C>T                | p.(Pro1486Leu)                     | 30           | c.4457C>T              | p.(Pro1486Leu)                | sporadic             | AR                | Stargardt disease/cone-rod dystrophy |                                   | Yes         |
| MD-0993 | STGD                | ABCA4 | NM_000350 | 13           | c.1804C>T                | p.(Arg602Tyr)                      | 23           | c.3386G>T              | p.(Arg1129Leu)                | sporadic             | AR                | Stargardt disease/cone-rod dystrophy |                                   | Yes         |
| MD-0995 | CCRD                | ABCA4 | NM_000350 | 11           | c.1364T>A                | p.(Leu455Gln)                      | 14           | c.2099G>A              | p.(Trp700*)                   | sporadic             | AR                | Stargardt disease/cone-rod dystrophy |                                   | NA          |
| MD-0997 | STGD                | ABCA4 | NM_000350 | 23           | c.3383A>G                | p.(Asp1128Gly)                     | 23           | c.3386G>T              | p.(Arg1129Leu)                | sporadic             | AR                | Stargardt disease/cone-rod dystrophy |                                   | Yes         |
| MD-1000 | STGD                | ABCA4 | NM_000350 | 16           | c.[2483C>T.2481del]      | p.[Pro828Leu;Thr829Argfs*14]       | 40           | c.5603A>T              | p.(Asn1868Ile)                | unknown              | AR                | Stargardt disease/cone-rod dystrophy |                                   | NA          |
| MD-1001 | STGD                | ABCA4 | NM_000350 | 44           | c.6089G>A                | p.(Arg2030Gln)                     | 47           | c.6410G>A              | p.(Cys2137Tyr)                | sporadic             | AR                | Stargardt disease/cone-rod dystrophy |                                   | NA          |
| MD-1002 | STGD                | ABCA4 | NM_000350 | 42           | c.5882G>A                | p.(Gly1961Glu)                     | IVS30        | c.4539+2064C>T         | p.(=Arg1514Leufs*36]          | sporadic             | AR                | Stargardt disease/cone-rod dystrophy |                                   | Yes         |
| MD-1007 | STGD                | ABCA4 | NM_000350 | 23           | c.3383A>G                | p.(Asp1128Gly)                     | 19           | c.5549T>C              | p.(Leu1850Pro)                | sporadic             | AR                | Stargardt disease/cone-rod dystrophy |                                   | NA          |
| MD-1010 | STGD                | ABCA4 | NM_000350 | 12           | c.1622T>C                | p.(Leu451Pro)                      | 37           | c.2588G>C              | p.[Gly863Ala;Gly863del]       | sporadic             | AR                | Stargardt disease/cone-rod dystrophy |                                   | Yes         |
| MD-1015 | STGD                | ABCA4 | NM_000350 | 38           | c.5384T>C                | p.(Leu1795Ser)                     | 38           | c.5384T>C              | p.(Leu1795Ser)                | AR                   | AR                | Stargardt disease/cone-rod dystrophy |                                   | Yes         |
| MD-1018 | OtherMD             | ABCA4 | NM_000350 | 13           | c.1804C>T                | p.(Arg602Tyr)                      | 23           | c.3386G>T              | p.(Arg1129Leu)                | sporadic             | AR                | Stargardt disease/cone-rod dystrophy |                                   | Yes         |
| MD-1022 | STGD                | ABCA4 | NM_000350 | 23           | c.3386G>T                | p.(Arg1129Leu)                     | IVS30        | c.4539+2064C>T         | p.(=Arg1514Leufs*36]          | AR                   | AR                | Stargardt disease/cone-rod dystrophy |                                   | NA          |
| MD-1025 | STGD                | ABCA4 | NM_000350 | 35           | c.4918C>T                | p.(Arg1640Trp)                     | 45           | c.6179T>G              | p.(Leu2060Arg)                | AR                   | AR                | Stargardt disease/cone-rod dystrophy |                                   | NA          |
| MD-1034 | STGD                | ABCA4 | NM_000350 | 23           | c.3383A>G                | p.(Asp1128Gly)                     | 23           | c.3383A>G              | p.(Asp1128Gly)                | sporadic             | AR                | Stargardt disease/cone-rod dystrophy |                                   | Yes         |
| MD-1036 | STGD                | ABCA4 | NM_000350 | 22,44        | c.[3322C>T.6071A>G]      | p.[Arg1108His;Asp2024Gly]          | 30           | c.4457C>T              | p.(Pro1486Leu)                |                      |                   |                                      |                                   |             |

Table S2. Description of genetics and clinical findings in 677 characterized *a priori* ar/SMD families. Novel variants are highlighted in gray.

| Family  | Suspected diagnosis | Gene  | RefSeq_NM | Allele1_exon | Allele1_cDNA             | Allele1_protein                   | Allele2_exon | Allele2_cDNA             | Allele2_protein                               | Inheritance a priori | Final inheritance | Clinical reclassification            | Genetic reclassification comments | Segregation |
|---------|---------------------|-------|-----------|--------------|--------------------------|-----------------------------------|--------------|--------------------------|-----------------------------------------------|----------------------|-------------------|--------------------------------------|-----------------------------------|-------------|
| MD-1045 | STGD                | ABCA4 | NM_000350 | 13           | c.1819G>C                | p.(Gly607Arg)                     | 42           | c.5882G>A                | p.(Gly1961Glu)                                | AR                   | AR                | Stargardt disease/cone-rod dystrophy |                                   | NA          |
| MD-1046 | STGD                | ABCA4 | NM_000350 | 23           | c.3386G>T                | p.(Arg1129Leu)                    | IVS33        | c.4773+1del              | p.?                                           | sporadic             | AR                | Stargardt disease/cone-rod dystrophy |                                   | Yes         |
| MD-1047 | STGD                | ABCA4 | NM_000350 | 22           | c.3210_3211dup           | p.(Ser1071Cysfs*14)               |              | c.3210_3211dup           | p.(Ser1071Cysfs*14)                           | sporadic             | AR                | Stargardt disease/cone-rod dystrophy |                                   | Yes         |
| MD-1048 | STGD                | ABCA4 | NM_000350 | 22           | c.3210_3211dup           | p.(Ser1071Cysfs*14)               |              | c.3386G>T                | p.(Arg1129Leu)                                | AR                   | AR                | Stargardt disease/cone-rod dystrophy |                                   | Yes         |
| MD-1049 | STGD                | ABCA4 | NM_000350 | 4            | c.428C>A                 | p.(Pro143Leu)                     | IVS40        | c.5714+5G>A              | p.[= Glu1863Lufs*33]                          | sporadic             | AR                | Stargardt disease/cone-rod dystrophy |                                   | Yes         |
| MD-1050 | CCRD                | ABCA4 | NM_000350 | 23           | c.3386G>T                | p.(Arg1129Leu)                    |              | c.3386G>T                | p.(Arg1129Leu)                                | sporadic             | AR                | Stargardt disease/cone-rod dystrophy |                                   | Yes         |
| MD-1059 | STGD                | ABCA4 | NM_000350 | 15           | c.2285G>A                | p.(Ala762Glu)                     |              | c.2385G>A                | p.(Arg1129Leu)                                | sporadic             | AR                | Stargardt disease/cone-rod dystrophy |                                   | NA          |
| MD-1063 | CCRD                | ABCA4 | NM_000350 | 35,36        | c.[4926C>G;5044_5058del] | p.[Ser1642Arg_Val1681_Cys1685del] | 35,36        | c.[4926C>G;5044_5058del] | p.[Ser1642Arg_Val1681_Cys1685del]             | AR                   | AR                | Stargardt disease/cone-rod dystrophy |                                   | NA          |
| MD-1064 | STGD                | ABCA4 | NM_000350 | 23           | c.3386G>T                | p.(Arg1129Leu)                    | IVS30        | c.4539+2064C>T           | p.[= Arg1514Lufs*36]#                         | sporadic             | AR                | Stargardt disease/cone-rod dystrophy |                                   | NA          |
| MD-1067 | STGD                | ABCA4 | NM_000350 | 45           | c.6229C>T                | p.(Arg2077Trp)                    |              | c.6229C>T                | p.(Arg2077Trp)                                | sporadic             | AR                | Stargardt disease/cone-rod dystrophy |                                   | NA          |
| MD-1070 | STGD                | ABCA4 | NM_000350 | 13           | c.1927G>A                | p.(Ala643Met)                     |              | c.6089G>A                | p.(Arg2030Gln)                                | sporadic             | AR                | Stargardt disease/cone-rod dystrophy |                                   | NA          |
| MD-1071 | CCRD                | ABCA4 | NM_000350 | 23           | c.3386G>T                | p.(Arg1129Leu)                    |              | c.3386G>T                | p.(Arg1129Leu)                                | sporadic             | AR                | Stargardt disease/cone-rod dystrophy |                                   | Yes         |
| MD-1072 | STGD                | ABCA4 | NM_000350 | 23           | c.3386G>T                | p.(Arg1129Leu)                    |              | c.5929G>A                | p.(Gly1977Ser)                                | sporadic             | AR                | Stargardt disease/cone-rod dystrophy |                                   | Yes         |
| MD-1075 | STGD                | ABCA4 | NM_000350 | 9            | c.1222C>T                | p.(Arg408*)                       | IVS28;40     | c.[4253+43G>A;5603A>T]   | p.[= Ile1377Hisfs*3]!(Asn1868Ile)             | sporadic             | AR                | Stargardt disease/cone-rod dystrophy |                                   | NA          |
| MD-1077 | STGD                | ABCA4 | NM_000350 | 8            | c.1025_1038del           | p.(Asp342Glyfs*6)                 |              | c.3292C>T                | p.(Arg1098Cys)                                | sporadic             | AR                | Stargardt disease/cone-rod dystrophy |                                   | Yes         |
| MD-1079 | OtherMD             | ABCA4 | NM_000350 | 19           | c.2791G>A                | p.(Val931Met)                     |              | c.5318C>T                | p.(Ala1773Val)                                | sporadic             | AR                | Stargardt disease/cone-rod dystrophy |                                   | NA          |
| MD-1086 | OtherMD             | ABCA4 | NM_000350 | 30           | c.4457C>T                | p.(Pro1486Leu)                    | IVS30        | c.4539+2064C>T           | p.[= Arg1514Lufs*36]                          | sporadic             | AR                | Stargardt disease/cone-rod dystrophy |                                   | Yes         |
| MD-1087 | STGD                | ABCA4 | NM_000350 | IVS34        | c.4849+3A>G              | p.[Gly1592_Lys1616del]=           | 42           | c.5882G>A                | p.(Gly1961Glu)                                | sporadic             | AR                | Stargardt disease/cone-rod dystrophy |                                   | Yes         |
| MD-1100 | STGD                | ABCA4 | NM_000350 | 3            | c.286A>G                 | p.(Asn96Asp)                      |              | c.3386G>T                | p.(Arg1129Leu)                                | sporadic             | AR                | Stargardt disease/cone-rod dystrophy |                                   | NA          |
| MD-1101 | STGD                | ABCA4 | NM_000350 | 17           | c.2589G>C                | p.(Gly863Ala_Gly863del)           | IVS30        | c.4539+2064C>T           | p.[= Arg1514Lufs*36]                          | sporadic             | AR                | Stargardt disease/cone-rod dystrophy |                                   | Yes         |
| MD-1102 | STGD                | ABCA4 | NM_000350 | 23,48        | c.[3386G>T;6718A>G]      | p.[Arg1129Leu;Thr2240Ala]         | IVS28        | c.4253+5G>A              | p.(Ile1377Hisfs*3)                            | sporadic             | AR                | Stargardt disease/cone-rod dystrophy |                                   | Yes         |
| MD-1106 | STGD                | ABCA4 | NM_000350 | 23           | c.3386G>T                | p.(Arg1129Leu)                    |              | c.5644A>G                | p.(Met1882Val)                                | sporadic             | AR                | Stargardt disease/cone-rod dystrophy |                                   | Yes         |
| MD-1107 | STGD                | ABCA4 | NM_000350 | 22           | c.3210_3211dup           | p.(Ser1071Cysfs*14)               |              | c.3277G>A                | p.(Asp1093Asn)                                | AR                   | AR                | Stargardt disease/cone-rod dystrophy |                                   | Yes         |
| MD-1110 | STGD                | ABCA4 | NM_000350 | 29           | c.4322A>G                | p.(Gly1441Asp)                    |              | c.6718A>G                | p.(Thr2240Ala)                                | sporadic             | AR                | Stargardt disease/cone-rod dystrophy |                                   | NA          |
| MD-1114 | STGD                | ABCA4 | NM_000350 | 23           | c.3386G>T                | p.(Arg1129Leu)                    |              | c.4469G>A                | p.(Cys1490Tyr)                                | sporadic             | AR                | Stargardt disease/cone-rod dystrophy |                                   | NA          |
| MD-1116 | STGD                | ABCA4 | NM_000350 | 6            | c.634C>T                 | p.(Arg212Cys)                     |              | c.4457C>T                | p.(Pro1486Leu)                                | sporadic             | AR                | Stargardt disease/cone-rod dystrophy |                                   | NA          |
| MD-1119 | STGD                | ABCA4 | NM_000350 | 23           | c.3386G>T                | p.(Arg1129Leu)                    |              | c.5819T>C                | p.(Leu1940Pro)                                | sporadic             | AR                | Stargardt disease/cone-rod dystrophy |                                   | Yes         |
| MD-1120 | STGD                | ABCA4 | NM_000350 | 19           | c.2888del                | p.(Gly963Lufs*14)                 |              | c.5603A>T                | p.(Asn1868Ile)                                | sporadic             | AR                | Stargardt disease/cone-rod dystrophy |                                   | NA          |
| MD-1121 | STGD                | ABCA4 | NM_000350 | IVS40        | c.5714+1G>A              | p.?                               |              | c.6718A>G                | p.(Thr2240Ala)                                | sporadic             | AR                | Stargardt disease/cone-rod dystrophy |                                   | Yes         |
| MD-1123 | CCRD                | ABCA4 | NM_000350 | 6            | c.634C>T                 | p.(Arg212Cys)                     |              | c.3386G>T                | p.(Arg1129Leu)                                | sporadic             | AR                | Stargardt disease/cone-rod dystrophy |                                   | NA          |
| MD-1130 | STGD                | ABCA4 | NM_000350 | 39           | c.5549T>C                | p.(Leu1850Pro)                    |              | c.5549T>C                | p.(Leu1850Pro)                                | AR                   | AR                | Stargardt disease/cone-rod dystrophy |                                   | Yes         |
| MD-1137 | STGD                | ABCA4 | NM_000350 | 23           | c.3386G>T                | p.(Arg1129Leu)                    |              | c.5819T>C                | p.(Leu1940Pro)                                | sporadic             | AR                | Stargardt disease/cone-rod dystrophy |                                   | NA          |
| MD-1138 | CCRD                | ABCA4 | NM_000350 | 4            | c.378G>A                 | p.(Trp126*)                       |              | c.634C>T                 | p.(Arg212Cys)                                 | sporadic             | AR                | Stargardt disease/cone-rod dystrophy |                                   | Yes         |
| MD-1139 | STGD                | ABCA4 | NM_000350 | 23           | c.3386G>T                | p.(Arg1129Leu)                    |              | c.6559C>T                | p.(Gln2187*)                                  | sporadic             | AR                | Stargardt disease/cone-rod dystrophy |                                   | NA          |
| MD-1145 | OtherMD             | ABCA4 | NM_000350 | 9            | c.1222C>T                | p.(Arg408*)                       |              | c.5603A>T                | p.(Asn1868Ile)                                | unknown              | AR                | Stargardt disease/cone-rod dystrophy |                                   | NA          |
| MD-1146 | STGD                | ABCA4 | NM_000350 | 14           | c.2023G>A                | p.(Val675Ile)                     |              | c.6410G>A                | p.(Cys2137Tyr)                                | sporadic             | AR                | Stargardt disease/cone-rod dystrophy |                                   | Yes         |
| MD-1147 | STGD                | ABCA4 | NM_000350 | 23           | c.3386G>T                | p.(Arg1129Leu)                    |              | c.4139C>T                | p.(Pro1380Leu)                                | sporadic             | AR                | Stargardt disease/cone-rod dystrophy |                                   | NA          |
| MD-1156 | STGD                | ABCA4 | NM_000350 | 3            | c.2879del                | p.(Asn96Thrfs*19)                 |              | c.1667T>G                | p.(Met556Arg)                                 | sporadic             | AR                | Stargardt disease/cone-rod dystrophy |                                   | Yes         |
| MD-1157 | CCRD                | ABCA4 | NM_000350 | 8            | c.982G>T                 | p.(Glu328*)                       |              | c.5882G>A                | p.(Gly1961Glu)                                | sporadic             | AR                | Stargardt disease/cone-rod dystrophy |                                   | Yes         |
| MD-1163 | OtherMD             | ABCA4 | NM_000350 | 13           | c.1804C>T                | p.(Arg620Trp)                     | IVS38;40     | c.[5461-10T>C;5603A>T]   | p.[Thr1821Aspfs*6;Thr1821Valfs*13;Asn1868Ile] | sporadic             | AR                | Stargardt disease/cone-rod dystrophy |                                   | Yes         |
| MD-1164 | STGD                | ABCA4 | NM_000350 | 30           | c.4457C>T                | p.(Pro1486Leu)                    |              | c.4457C>T                | p.(Pro1486Leu)                                | AR                   | AR                | Stargardt disease/cone-rod dystrophy |                                   | NA          |
| MD-1184 | STGD                | ABCA4 | NM_000350 | 23           | c.3386G>T                | p.(Arg1129Leu)                    | IVS28        | c.4253+4C>T              | p.(Ile1377Hisfs*3)                            | AR                   | AR                | Stargardt disease/cone-rod dystrophy |                                   | Yes         |
| MD-1193 | STGD                | ABCA4 | NM_000350 | 22           | c.3292C>T                | p.(Arg1098Cys)                    |              | c.5630_5644dup           | p.(Lys1877_Ala1881dup)                        | sporadic             | AR                | Stargardt disease/cone-rod dystrophy |                                   | NA          |
| MD-1202 | STGD                | ABCA4 | NM_000350 | 13           | c.1804C>T                | p.(Arg620Trp)                     |              | c.5882G>T                | p.(Gly1961Glu)                                | AR                   | AR                | Stargardt disease/cone-rod dystrophy |                                   | Yes         |
| MD-1205 | STGD                | ABCA4 | NM_000350 | 41           | c.5819T>C                | p.(Leu1940Pro)                    |              | c.5882G>A                | p.(Gly1961Glu)                                | AR                   | AR                | Stargardt disease/cone-rod dystrophy |                                   | NA          |
| MD-1207 | STGD                | ABCA4 | NM_000350 | 23           | c.3386G>T                | p.(Arg1129Leu)                    |              | c.4436G>A                | p.(Trp1479*)                                  | AR                   | AR                | Stargardt disease/cone-rod dystrophy |                                   | NA          |
| MD-1208 | STGD                | ABCA4 | NM_000350 | 23           | c.3386G>T                | p.(Arg1129Leu)                    |              | c.6437G>T                | p.(Gly2146Val)                                | sporadic             | AR                | Stargardt disease/cone-rod dystrophy |                                   | NA          |
| MD-1211 | STGD                | ABCA4 | NM_000350 | 6            | c.634C>T                 | p.(Arg212Cys)                     |              | c.3386G>T                | p.(Arg1129Leu)                                | sporadic             | AR                | Stargardt disease/cone-rod dystrophy |                                   | NA          |
| MD-1212 | STGD                | ABCA4 | NM_000350 | 23           | c.3386G>T                | p.(Arg1129Leu)                    |              | c.5318C>T                | p.(Ala1773Val)                                | sporadic             | AR                | Stargardt disease/cone-rod dystrophy |                                   | Yes         |
| MD-1215 | STGD                | ABCA4 | NM_000350 | 13           | c.1819G>C                | p.(Gly607Arg)                     |              | c.5603A>T                | p.(Asn1868Ile)                                | sporadic             | AR                | Stargardt disease/cone-rod dystrophy |                                   | Yes         |
| MD-1216 | STGD                | ABCA4 | NM_000350 | 13           | c.1786G>A                | p.(Trp589*)                       |              | c.3386G>T                | p.(Arg1129Leu)                                | sporadic             | AR                | Stargardt disease/cone-rod dystrophy |                                   | NA          |
| MD-1219 | STGD                | ABCA4 | NM_000350 | 8            | c.874A>C                 | p.(Ser292Arg)                     |              | c.3251T>C                | p.(Ile1084Thr)                                | sporadic             | AR                | Stargardt disease/cone-rod dystrophy |                                   | NA          |
| MD-1220 | STGD                | ABCA4 | NM_000350 | 42           | c.5882G>A                | p.(Gly1961Glu)                    |              | c.6449G>T                | p.(Cys2150Tyr)                                | sporadic             | AR                | Stargardt disease/cone-rod dystrophy |                                   | NA          |
| MD-1223 | STGD                | ABCA4 | NM_000350 | 21           | c.3056G>T                | p.(Thr1019Met)                    |              | c.4849del                | p.(Thr1617Cysfs*45)                           | sporadic             | AR                | Stargardt disease/cone-rod dystrophy |                                   | Yes         |
| MD-1228 | STGD                | ABCA4 | NM_000350 | 23           | c.3386G>T                | p.(Arg1129Leu)                    |              | c.5549T>C                | p.(Leu1850Pro)                                | sporadic             | AR                | Stargardt disease/cone-rod dystrophy |                                   | Yes         |
| MD-1230 | STGD                | ABCA4 | NM_000350 | 22           | c.3210_3211dup           | p.(Ser1071Cysfs*14)               |              | c.5318C>T                | p.(Ala1773Val)                                | sporadic             | AR                | Stargardt disease/cone-rod dystrophy |                                   | NA          |
| MD-1233 | STGD                | ABCA4 | NM_000350 | 22,46        | c.[3322C>T;6320G>A]      | p.[Arg1108Cys;Arg2107His]         |              | c.5882G>A                | p.(Gly1961Glu)                                | sporadic             | AR                | Stargardt disease/cone-rod dystrophy |                                   | NA          |
| MD-1235 | STGD                | ABCA4 | NM_000350 | 27           | c.3988G>T                | p.(Glu1330*)                      | IVS38        | c.5461-1G>T              | p.?                                           | sporadic             | AR                | Stargardt disease/cone-rod dystrophy |                                   | NA          |
| MD-1236 | OtherMD             | ABCA4 | NM_000350 | 23           | c.3386G>T                | p.(Arg1129Leu)                    |              | c.6718A>G                | p.(Thr2240Ala)                                | AR                   | AR                | Stargardt disease/cone-rod dystrophy |                                   | NA          |
| MD-1238 | STGD                | ABCA4 | NM_000350 | 23           | c.3277G>A                | p.(Asp1093Asn)                    |              | c.3386G>T                | p.(Arg1129Leu)                                | AR                   | AR                | Stargardt disease/cone-rod dystrophy |                                   | NA          |
| MD-1239 | STGD                | ABCA4 | NM_000350 | 22           | c.3259G>A                | p.(Glu108Lys)                     |              | c.5044_5058del           | p.[Val1682_Val1686del]                        | unknown              | AR                | Stargardt disease/cone-rod dystrophy |                                   | NA          |
| MD-1240 | STGD                | ABCA4 | NM_000350 | 1            | c.32T>C                  | p.(Leu11Pro)                      |              | c.4457C>T                | p.(Pro1486Leu)                                | AR                   | AR                | Stargardt disease/cone-rod dystrophy |                                   | NA          |
| MD-1243 | STGD                | ABCA4 | NM_000350 | 23           | c.3386G>T                | p.(Arg1129Leu)                    |              | c.3943C>T                | p.(Gln1315*)                                  | sporadic             | AR                | Stargardt disease/cone-rod dystrophy |                                   | Yes         |
| MD-1246 | STGD                | ABCA4 | NM_000350 | 35           | c.4918C>T                | p.(Arg1640Trp)                    |              | c.6329G>A                | p.(Trp2110*)                                  | unknown              | AR                | Stargardt disease/cone-rod dystrophy |                                   | NA          |
| MD-1249 | OtherMD             | ABCA4 | NM_000350 | 8            | c.871C>G                 | p.(Pro291Ala)                     |              | c.5819T>C                | p.(Leu1940Pro)                                | AR                   | AR                | Stargardt disease/cone-rod dystrophy |                                   | NA          |
| MD-1251 | STGD                | ABCA4 | NM_000350 | 22,46        | c.[3322C>T;6320G>A]      | p.[Arg1108Cys;Arg2107His]         | IVS38        | c.5461-10T>C             | p.(Thr1821Aspfs*6)                            | sporadic             | AR                | Stargardt disease/cone-rod dystrophy |                                   | NA          |
| MD-1255 | STGD                | ABCA4 | NM_000350 | 35           | c.4918C>T                | p.(Arg1640Trp)                    |              | c.5882G>T                | p.(Gly1961Glu)                                | sporadic             | AR                | Stargardt disease/cone-rod dystrophy |                                   | NA          |
| MD-1256 | STGD                | ABCA4 | NM_000350 | IVS14        | c.2161-8G>A              | p.(His721_Val729del)              |              | c.2613G>A                | p.(Trp871*)                                   | unknown              | AR                | Stargardt disease/cone-rod dystrophy |                                   | NA          |
| MD-1257 | STGD                | ABCA4 | NM_000350 | 3            | c.214G>A                 | p.(Gly72Arg)                      |              | c.5929G>A                | p.(Gly1977Ser)                                | sporadic             | AR                | Stargardt disease/cone-rod dystrophy |                                   | NA          |
| MD-1258 | OtherMD             | ABCA4 | NM_000350 | 22           | c.3259G>A                | p.(Glu108Lys)                     |              | c.3259G>A                | p.(Glu108Lys)                                 | unknown              | AR                | Stargardt disease/cone-rod dystrophy |                                   | NA          |
| MD-1264 | STGD                | ABCA4 | NM_000350 | 23           | c.3386G>T                | p.(Arg1129Leu)                    |              | c.4700C>T                | p.(Ala1357Val)                                | AR                   | AR                | Stargardt disease/cone-rod dystrophy |                                   | Yes         |
| MD-1271 | STGD                | ABCA4 | NM_000350 | 22,46        | c.[3322C>T;6320G>A]      | p.[Arg1108Cys;Arg2107His]         |              | c.3386G>T                | p.(Arg1129Leu)                                | sporadic             | AR                | Stargardt disease/cone-rod dystrophy |                                   | Yes         |
| MD-127  |                     |       |           |              |                          |                                   |              |                          |                                               |                      |                   |                                      |                                   |             |

Table S2. Description of genetics and clinical findings in 677 characterized *a priori* ar/SMD families. Novel variants are highlighted in gray.

| Family  | Suspected diagnosis | Gene  | RefSeq_NM | Allele1_exon | Allele1_cDNA        | Allele1_protein              | Allele2_exon | Allele2_cDNA           | Allele2_protein                               | Inheritance a priori | Final inheritance | Clinical reclassification            | Genetic reclassification comments | Segregation |
|---------|---------------------|-------|-----------|--------------|---------------------|------------------------------|--------------|------------------------|-----------------------------------------------|----------------------|-------------------|--------------------------------------|-----------------------------------|-------------|
| MD-1273 | STGD                | ABCA4 | NM_000350 | 23,48        | c.[3386G>T;6718A>G] | p.[Arg1129Leu;Thr2240Ala]    | 23,48        | c.[3386G>T;6718A>G]    | p.[Arg1129Leu;Thr2240Ala]                     | sporadic             | AR                | Stargardt disease/cone-rod dystrophy |                                   | Yes         |
| MD-1274 | STGD                | ABCA4 | NM_000350 | 23           | c.3386G>T           | p.(Arg1129Leu)               | IVS28        | c.4253+4C>T            | p.(Ile1377Hisfs*3)                            | sporadic             | AR                | Stargardt disease/cone-rod dystrophy |                                   | NA          |
| MD-1279 | STGD                | ABCA4 | NM_000350 | 23           | c.3386G>T           | p.(Arg1129Leu)               | IVS38;40     | c.[5461-10T>C;5603A>T] | p.[Thr1821Aspfs*6;Thr1821Valfs*13;Asn1868Ile] | sporadic             | AR                | Stargardt disease/cone-rod dystrophy |                                   | NA          |
| MD-1298 | STGD                | ABCA4 | NM_000350 | 35           | c.4919G>A           | p.(Arg1640Gln)               | IVS40        | c.5714+5G>A            | p.[=;Glu1963Lufs*33]                          | sporadic             | AR                | Stargardt disease/cone-rod dystrophy |                                   | NA          |
| MD-1300 | CCRD                | ABCA4 | NM_000350 | 23           | c.3386G>T           | p.(Arg1129Leu)               | IVS38        | c.54761-10T>C          | p.(Thr1821Aspfs*6)                            | unknown              | AR                | Stargardt disease/cone-rod dystrophy |                                   | NA          |
| MD-1302 | STGD                | ABCA4 | NM_000350 | 30           | c.4457C>T           | p.(Pro1486Leu)               | 30           | c.4457C>T              | p.(Pro1486Leu)                                | sporadic             | AR                | Stargardt disease/cone-rod dystrophy |                                   | NA          |
| MD-1339 | STGD                | ABCA4 | NM_000350 | 22           | c.3210_3211dup      | p.(Ser1071Cysfs*14)          | 23           | c.3386G>T              | p.(Arg1129Leu)                                | sporadic             | AR                | Stargardt disease/cone-rod dystrophy |                                   | Yes         |
| MD-1343 | STGD                | ABCA4 | NM_000350 | 38           | c.5318C>T           | p.(Ala1773Val)               | 38           | c.5318C>T              | p.(Ala1773Val)                                | sporadic             | AR                | Stargardt disease/cone-rod dystrophy |                                   | NA          |
| MD-1348 | STGD                | ABCA4 | NM_000350 | 22           | c.3210_3211dup      | p.(Ser1071Cysfs*14)          | 23           | c.3386G>T              | p.(Arg1129Leu)                                | sporadic             | AR                | Stargardt disease/cone-rod dystrophy |                                   | NA          |
| MD-1349 | STGD                | ABCA4 | NM_000350 | 13           | c.1804C>T           | p.(Arg602Trp)                | 42           | c.5882G>A              | p.(Gly1961Glu)                                | sporadic             | AR                | Stargardt disease/cone-rod dystrophy |                                   | NA          |
| MD-1350 | STGD                | ABCA4 | NM_000350 | 17           | c.2588G>C           | p.[Gly863Ala;Gly863del]      | 19           | c.2888del              | p.[Gly963Alafs*14]                            | AR                   | AR                | Stargardt disease/cone-rod dystrophy |                                   | NA          |
| MD-1353 | OtherMD             | ABCA4 | NM_000350 | 12           | c.1609G>T           | p.(Asn1805Asp)               | 43           | c.5981G>A              | p.(Gly1994Glu)                                | sporadic             | AR                | Stargardt disease/cone-rod dystrophy |                                   | NA          |
| MD-1356 | CCRD                | ABCA4 | NM_000350 | 23           | c.3386G>T           | p.(Arg1129Leu)               | 23           | c.3386G>T              | p.(Arg1129Leu)                                | AR                   | AR                | Stargardt disease/cone-rod dystrophy |                                   | NA          |
| MD-1359 | STGD                | ABCA4 | NM_000350 | 12,21        | c.[1622T>C;3113C>T] | p.[Leu541Pro;Ala1038Val]     | 42           | c.5882G>A              | p.(Gly1961Glu)                                | AR                   | AR                | Stargardt disease/cone-rod dystrophy |                                   | NA          |
| MD-1375 | OtherMD             | ABCA4 | NM_000350 | 23           | c.3386G>T           | p.(Arg1129Leu)               | 23           | c.3386G>T              | p.(Arg1129Leu)                                | AR                   | AR                | Stargardt disease/cone-rod dystrophy |                                   | NA          |
| MD-1376 | OtherMD             | ABCA4 | NM_000350 | 23           | c.3386G>T           | p.(Arg1129Leu)               | 38           | c.5318C>T              | p.(Ala1773Val)                                | AR                   | AR                | Stargardt disease/cone-rod dystrophy |                                   | NA          |
| MD-1377 | OtherMD             | ABCA4 | NM_000350 | 13           | c.1853G>T           | p.(Glu618Val)                | 39           | c.5531_5557dup         | p.(Gly1844_Gln1852dup)                        | unknown              | AR                | Stargardt disease/cone-rod dystrophy |                                   | NA          |
| MD-1381 | OtherMD             | ABCA4 | NM_000350 | IVS28        | c.4253+4G>A         | p.[=;Ile1377Hisfs*3]         | 35           | c.4919G>A              | p.(Arg1640Gln)                                | AR                   | AR                | Stargardt disease/cone-rod dystrophy |                                   | Yes         |
| RP-0033 | CCRD                | ABCA4 | NM_000350 | 13           | c.1848del           | p.(Glu616Aspfs*33)           | 13           | c.1848del              | p.(Glu616Aspfs*33)                            | AR                   | AR                | Stargardt disease/cone-rod dystrophy |                                   | Yes         |
| RP-0193 | STGD                | ABCA4 | NM_000350 | 45           | c.6179T>G           | p.(Leu2060Arg)               | 45           | c.6179T>G              | p.(Leu2060Arg)                                | sporadic             | AR                | Stargardt disease/cone-rod dystrophy |                                   | NA          |
| RP-0266 | CCRD                | ABCA4 | NM_000350 | IVS28        | c.4253+5G>A         | p.(Ile1377Hisfs*3)           | 46           | c.6179T>G              | p.(Leu2060Arg)                                | AR                   | AR                | Stargardt disease/cone-rod dystrophy |                                   | NA          |
| RP-0267 | CCRD                | ABCA4 | NM_000350 | 36           | c.5044_5058del      | p.(Val1682_Val1686del)       | 38           | c.5044_5058del         | p.(Val1682_Val1686del)                        | AR                   | AR                | Stargardt disease/cone-rod dystrophy |                                   | Yes         |
| RP-0280 | STGD                | ABCA4 | NM_000350 | 38           | c.5413A>G           | p.(Asn1805Asp)               | 36           | c.5413A>G              | p.(Asn1805Asp)                                | AR                   | AR                | Stargardt disease/cone-rod dystrophy |                                   | Yes         |
| RP-0298 | CCRD                | ABCA4 | NM_000350 | 8            | c.950del            | p.(Gly317Alafs*57)           | 33           | c.4720G>T              | p.(Glu1574)                                   | AR                   | AR                | Stargardt disease/cone-rod dystrophy |                                   | yes         |
| RP-0532 | CCRD                | ABCA4 | NM_000350 | 23           | c.3386G>T           | p.(Arg1129Leu)               | 38           | c.5318C>T              | p.(Ala1773Val)                                | AR                   | AR                | Stargardt disease/cone-rod dystrophy |                                   | Yes         |
| RP-0674 | CCRD                | ABCA4 | NM_000350 | 3            | c.287del            | p.(Asn96Thrs*19)             | 30           | c.4537dup              | p.(Gln1513Profs*42)                           | AR                   | AR                | Stargardt disease/cone-rod dystrophy |                                   | Yes         |
| RP-0714 | CCRD                | ABCA4 | NM_000350 | IVS28        | c.4253+4C>T         | p.(Ile1377Hisfs*3)           | IVS28        | c.4253+4C>T            | p.(Ile1377Hisfs*3)                            | sporadic             | AR                | Stargardt disease/cone-rod dystrophy |                                   | yes         |
| RP-0741 | CCRD                | ABCA4 | NM_000350 | 43           | c.5917del           | p.(Val1973*)                 | 43           | c.5917del              | p.(Val1973*)                                  | sporadic             | AR                | Stargardt disease/cone-rod dystrophy |                                   | NA          |
| RP-0998 | CCRD                | ABCA4 | NM_000350 | 14           | c.2041C>T           | p.(Arg681)                   | 22           | c.3210_3211dup         | p.(Ser1071Cysfs*14)                           | AR                   | AR                | Stargardt disease/cone-rod dystrophy |                                   | Yes         |
| RP-1102 | CCRD                | ABCA4 | NM_000350 | 15           | c.2285C>A           | p.(Ala762Glu)                | 15           | c.2285C>A              | p.(Ala762Glu)                                 | AR                   | AR                | Stargardt disease/cone-rod dystrophy |                                   | Yes         |
| RP-1112 | CCRD                | ABCA4 | NM_000350 | 1            | c.1A>G              | p.(Met1Val)                  | 22           | c.3210_3211dup         | p.(Ser1071Cysfs*14)                           | sporadic             | AR                | Stargardt disease/cone-rod dystrophy |                                   | NA          |
| RP-1126 | CCRD                | ABCA4 | NM_000350 | IVS26        | c.3862+1G>A         | p.?                          | 46           | c.6329G>A              | p.(Trp2110*)                                  | AR                   | AR                | Stargardt disease/cone-rod dystrophy |                                   | NA          |
| RP-1367 | CCRD                | ABCA4 | NM_000350 | IVS26        | c.3862+1G>A         | p.?                          | IVS26        | c.3862+1G>A            | p.?                                           | AR                   | AR                | Stargardt disease/cone-rod dystrophy |                                   | NA          |
| RP-1455 | CCRD                | ABCA4 | NM_000350 | 19           | c.2888del           | p.(Gly963Alafs*14)           | 48           | c.6688del              | p.(Leu2230Serfs*17)                           | AR                   | AR                | Stargardt disease/cone-rod dystrophy |                                   | Yes         |
| RP-1481 | STGD                | ABCA4 | NM_000350 | 21           | c.3113C>T           | p.(Ala1038Val)               | 23           | c.3386G>T              | p.(Arg1129Leu)                                | sporadic             | AR                | Stargardt disease/cone-rod dystrophy |                                   | NA          |
| RP-1539 | CCRD                | ABCA4 | NM_000350 | 22           | c.3210_3211dup      | p.(Ser1071Cysfs*14)          | 30           | c.4417C>A              | p.(Leu1437Met)                                | sporadic             | AR                | Stargardt disease/cone-rod dystrophy |                                   | NA          |
| RP-1543 | CCRD                | ABCA4 | NM_000350 | 28           | c.4234C>T           | p.(Gln1412*)                 | 43           | c.5917del              | p.(Val1973*)                                  | sporadic             | AR                | Stargardt disease/cone-rod dystrophy |                                   | NA          |
| RP-1578 | STGD                | ABCA4 | NM_000350 | 22           | c.3287C>T           | p.(Ser1096Leu)               | 34           | c.4793C>A              | p.(Ala1598Asp)                                | AR                   | AR                | Stargardt disease/cone-rod dystrophy |                                   | NA          |
| RP-1603 | CCRD                | ABCA4 | NM_000350 | 16           | c.2568C>A           | p.(Tyr856*)                  | 16           | c.2568C>A              | p.(Tyr856*)                                   | sporadic             | AR                | Stargardt disease/cone-rod dystrophy |                                   | NA          |
| RP-1669 | CCRD                | ABCA4 | NM_000350 | 22           | c.3210_3211dup      | p.(Ser1071Cysfs*14)          | 22           | c.3210_3211dup         | p.(Ser1071Cysfs*14)                           | AR                   | AR                | Stargardt disease/cone-rod dystrophy |                                   | NA          |
| RP-1680 | CCRD                | ABCA4 | NM_000350 | 13           | c.1804C>T           | p.(Arg602Trp)                | 36           | c.5044_5058del         | p.(Val1682_Val1686del)                        | AR                   | AR                | Stargardt disease/cone-rod dystrophy |                                   | NA          |
| RP-1715 | CCRD                | ABCA4 | NM_000350 | 13           | c.1804C>T           | p.(Arg602Trp)                | 13           | c.1804C>T              | p.(Arg602Trp)                                 | AR                   | AR                | Stargardt disease/cone-rod dystrophy |                                   | Yes         |
| RP-1742 | STGD                | ABCA4 | NM_000350 | 20           | c.2980A>G           | p.(Ile994Val)                | 38           | c.5383T>G              | p.(Leu1795Val)                                | sporadic             | AR                | Stargardt disease/cone-rod dystrophy |                                   | NA          |
| RP-1769 | STGD                | ABCA4 | NM_000350 | 5            | c.560G>A            | p.(Arg187His)                | 22           | c.3210_3211dup         | p.(Ser1071Cysfs*14)                           | sporadic             | AR                | Stargardt disease/cone-rod dystrophy |                                   | NA          |
| RP-1819 | CCRD                | ABCA4 | NM_000350 | 22           | c.3210_3211dup      | p.(Ser1071Cysfs*14)          | 22           | c.3210_3211dup         | p.(Ser1071Cysfs*14)                           | AR                   | AR                | Stargardt disease/cone-rod dystrophy |                                   | NA          |
| RP-1844 | CCRD                | ABCA4 | NM_000350 | 30           | c.4537dup           | p.(Gln1513Profs*42)          | 30           | c.4537dup              | p.(Gln1513Profs*42)                           | AR                   | AR                | Stargardt disease/cone-rod dystrophy |                                   | NA          |
| RP-2028 | STGD                | ABCA4 | NM_000350 | 15           | c.2300T>A           | p.(Val767Asp)                | IVS41        | c.5836-1G>C            | p.?                                           | sporadic             | AR                | Stargardt disease/cone-rod dystrophy |                                   | NA          |
| RP-2104 | STGD                | ABCA4 | NM_000350 | 13           | c.1879G>T           | p.(Glu627*)                  | 41           | c.5819T>C              | p.(Leu1940Pro)                                | sporadic             | AR                | Stargardt disease/cone-rod dystrophy |                                   | Yes         |
| RP-2133 | CCRD                | ABCA4 | NM_000350 | 6            | c.634C>T            | p.(Arg212Cys)                | 36           | c.5044_5058del         | p.(Val1682_Val1686del)                        | AR                   | AR                | Stargardt disease/cone-rod dystrophy |                                   | NA          |
| RP-2143 | CCRD                | ABCA4 | NM_000350 | 9            | c.1222C>T           | p.(Arg408*)                  | IVS38        | c.5461-1G>T            | p.?                                           | sporadic             | AR                | Stargardt disease/cone-rod dystrophy |                                   | Yes         |
| RP-2198 | CCRD                | ABCA4 | NM_000350 | 23           | c.3386G>T           | p.(Arg1129Leu)               | 23           | c.3386G>T              | p.(Arg1129Leu)                                | sporadic             | AR                | Stargardt disease/cone-rod dystrophy |                                   | NA          |
| RP-2210 | CCRD                | ABCA4 | NM_000350 | 21           | c.3056C>T           | p.(Thr1019Met)               | 21           | c.3056C>T              | p.(Thr1019Met)                                | sporadic             | AR                | Stargardt disease/cone-rod dystrophy |                                   | NA          |
| RP-2252 | CCRD                | ABCA4 | NM_000350 | 19           | c.2878G>A           | p.(Ala960Thr)                | 42           | c.5882G>A              | p.(Gly1961Glu)                                | sporadic             | AR                | Stargardt disease/cone-rod dystrophy |                                   | Yes         |
| RP-2343 | CCRD                | ABCA4 | NM_000350 | 6            | c.613T>G            | p.(Cys205Gly)                | 41           | c.5819T>C              | p.(Leu1940Pro)                                | sporadic             | AR                | Stargardt disease/cone-rod dystrophy |                                   | Yes         |
| RP-2386 | CCRD                | ABCA4 | NM_000350 | 13           | c.1804C>T           | p.(Arg602Trp)                | 13           | c.1804C>T              | p.(Arg602Trp)                                 | sporadic             | AR                | Stargardt disease/cone-rod dystrophy |                                   | NA          |
| RP-2419 | STGD                | ABCA4 | NM_000350 | 11           | c.1364T>A           | p.(Leu455Gln)                | 34           | c.4793C>A              | p.(Ala1598Asp)                                | sporadic             | AR                | Stargardt disease/cone-rod dystrophy |                                   | Yes         |
| RP-2492 | STGD                | ABCA4 | NM_000350 | 22           | c.3210_3211dup      | p.(Ser1071Cysfs*14)          | 42           | c.4672G>A              | p.(Gly1558Arg)                                | sporadic             | AR                | Stargardt disease/cone-rod dystrophy |                                   | NA          |
| RP-2500 | STGD                | ABCA4 | NM_000350 | 6            | c.671del            | p.(Thr224Argfs*17)           | 33           | c.5882G>A              | p.(Gly1961Glu)                                | sporadic             | AR                | Stargardt disease/cone-rod dystrophy |                                   | NA          |
| RP-2520 | CCRD                | ABCA4 | NM_000350 | IVS28        | c.4253+5G>A         | p.(Ile1377Hisfs*3)           | IVS28        | c.4253+5G>A            | p.(Ile1377Hisfs*3)                            | sporadic             | AR                | Stargardt disease/cone-rod dystrophy |                                   | Yes         |
| RP-2531 | STGD                | ABCA4 | NM_000350 | IVS6-Ex6     | c.699_768+341del    | p.(Gln234Phefs*5)            | IVS6-Ex6     | c.699_768+341del       | p.(Gln234Phefs*5)                             | AR                   | AR                | Stargardt disease/cone-rod dystrophy |                                   | NA          |
| RP-2668 | CCRD                | ABCA4 | NM_000350 | IVS6-Ex6     | c.699_768+341del    | p.(Gln234Phefs*5)            | 30           | c.4457C>T              | p.(Pro1486Leu)                                | sporadic             | AR                | Stargardt disease/cone-rod dystrophy |                                   | Yes         |
| RP-2680 | CCRD                | ABCA4 | NM_000350 | 19           | c.2888del           | p.(Gly963Alafs*14)           | 30           | c.4457C>T              | p.(Pro1486Leu)                                | AR                   | AR                | Stargardt disease/cone-rod dystrophy |                                   | Yes         |
| RP-2711 | STGD                | ABCA4 | NM_000350 | IVS20        | c.3050+5G>A         | p.(Leu973_His1017delinsPhe)# | 23           | c.3386G>T              | p.(Arg1129Leu)                                | sporadic             | AR                | Stargardt disease/cone-rod dystrophy |                                   | NA          |
| RP-2867 | STGD                | ABCA4 | NM_000350 | 23           | c.3386G>T           | p.(Arg1129Leu)               | IVS28        | c.4253+5G>A            | p.(Ile1377Hisfs*3)                            | AR                   | AR                | Stargardt disease/cone-rod dystrophy |                                   | NA          |
| RP-2948 | CCRD                | ABCA4 | NM_000350 | 23           | c.3386G>T           | p.(Arg1129Leu)               | 41           | c.5819T>C              | p.(Leu1940Pro)                                | AR                   | AR                | Stargardt disease/cone-rod dystrophy |                                   | NA          |
| RP-2956 | CCRD                | ABCA4 | NM_000350 | 28           | c.4253+5G>A         | p.(Ile1377Hisfs*3)           | 28           | c.4253+5G>A            | p.(Ile1377Hisfs*3)                            | AR                   | AR                | Stargardt disease/cone-rod dystrophy |                                   | Yes         |
| RP-3080 | STGD                | ABCA4 | NM_000350 | 45           | c.6179T>G           | p.(Leu2060Arg)               | 48           | c.6647C>T              | p.(Ala2216Val)                                | AR                   | AR                | Stargardt disease/cone-rod dystrophy |                                   | NA          |
| RP-3093 | CCRD                | ABCA4 | NM_000350 | 33           | c.4773+1G>T         | p.?                          | 33           | c.4773+1G>T            | p.?                                           | AR                   | AR                | Stargardt disease/cone-rod dystrophy |                                   | Yes         |
| RP-3118 | STGD                | ABCA4 | NM_000350 | 23           | c.3386G>T           | p.(Arg1129Leu)               | 25           | c.4918C>T              | p.(Arg1640Trp)                                | sporadic             | AR                | Stargardt disease/cone-rod dystrophy |                                   | Yes         |
| RP-3136 | STGD                | ABCA4 | NM_000350 | 23           | c.3420C>G           | p.(Cys1140Trp)               | 23           | c.3386G>T              | p.(Arg1129Leu)                                | unknown              | AR                | Stargardt disease/cone-rod dystrophy |                                   | NA          |
| MD-1391 | STGD                | ABCA4 | NM_000350 | 23           | c.3386G>T           | p.(Arg1129Leu)               | 41           | c.5819T>C              | p.(Leu1940Pro)                                | AR                   | AR                | Stargardt disease/cone-rod dystrophy |                                   | NA          |
| MD-1396 | STGD                | ABCA4 |           |              |                     |                              |              |                        |                                               |                      |                   |                                      |                                   |             |

Table S2. Description of genetics and clinical findings in 677 characterized *a priori* ar/SMD families. Novel variants are highlighted in gray.

| Family  | Suspected diagnosis | Gene  | RefSeq_NM    | Allele1_exon | Allele1_cDNA        | Allele1_protein                | Allele2_exon | Allele2_cDNA     | Allele2_protein        | Inheritance a priori | Final inheritance | Clinical reclassification               | Genetic reclassification comments | Segregation |
|---------|---------------------|-------|--------------|--------------|---------------------|--------------------------------|--------------|------------------|------------------------|----------------------|-------------------|-----------------------------------------|-----------------------------------|-------------|
| MD-1405 | OtherMD             | ABCA4 | NM_000350    | 23           | c.3386G>T           | p.(Arg1129Leu)                 | 30           | c.4457C>T        | p.(Pro1486Leu)         | sporadic             | AR                | Stargardt disease/cone-rod dystrophy    |                                   | Yes         |
| MD-1407 | STGD                | ABCA4 | NM_000350    | 27           | c.3874C>T           | p.(Gln1292*)                   | 27           | c.6449G>T        | p.(Cys2150Tyr)         | AR                   | AR                | Stargardt disease/cone-rod dystrophy    |                                   | Yes         |
| MD-1411 | STGD                | ABCA4 | NM_000350    | 22           | c.3329G>A           | p.(Arg1108His)                 | 43           | c.3386G>A        | p.(Arg1129Leu)         | sporadic             | AR                | Stargardt disease/cone-rod dystrophy    |                                   | Yes         |
| MD-1415 | OtherMD             | ABCA4 | NM_000350    | IVS30        | c.4539+2064C>T      | p.[=Arg1514Leufs*36]           | 36           | c.5044_5058del   | p.(Val1682_Val1686del) | sporadic             | AR                | Stargardt disease/cone-rod dystrophy    |                                   | NA          |
| MD-1416 | STGD                | ABCA4 | NM_000350    | 23           | c.3386G>T           | p.(Arg1129Leu)                 | 48           | c.6718A>G        | p.(Trp2240Ala)         | AR                   | AR                | Stargardt disease/cone-rod dystrophy    |                                   | Yes         |
| MD-1419 | STGD                | ABCA4 | NM_000350    | 44           | c.6112C>T           | p.(Arg2038Trp)                 | 44           | c.6112C>T        | p.(Arg2038Trp)         | unknown              | AR                | Stargardt disease/cone-rod dystrophy    |                                   | NA          |
| MD-1430 | OtherMD             | ABCA4 | NM_000350    | 47           | c.6449G>A           | p.(Cys2150Tyr)                 | 48           | c.6512T>G        | p.(Ile2171Ser) novel   | sporadic             | AR                | Stargardt disease/cone-rod dystrophy    |                                   | Yes         |
| MD-1434 | OtherMD             | ABCA4 | NM_000350    | 13           | c.1804C>T           | p.(Arg602Trp)                  | 42           | c.5882G>A        | p.(Gly1961Glu)         | unknown              | AR                | Stargardt disease/cone-rod dystrophy    |                                   | NA          |
| MD-1436 | OtherMD             | ABCA4 | NM_000350    | 6            | c.634C>T            | p.(Arg212Cys)                  | 23           | c.3386G>T        | p.(Arg1129Leu)         | AR                   | AR                | Stargardt disease/cone-rod dystrophy    |                                   | NA          |
| MD-1438 | STGD                | ABCA4 | NM_000350    | 12           | c.1622T>C           | p.(Leu541Pro)                  | 21           | c.3113C>T        | p.(Ala1038Val)         | unknown              | AR                | Stargardt disease/cone-rod dystrophy    |                                   | NA          |
| MD-1442 | OtherMD             | ABCA4 | NM_000350    | 21           | c.3113C>T           | p.(Ala1038Val)                 | 35           | c.4919G>A        | p.(Arg1640Gln)         | AR                   | AR                | Stargardt disease/cone-rod dystrophy    |                                   | Yes         |
| MD-1443 | STGD                | ABCA4 | NM_000350    | 21           | c.3056C>T           | p.(Thr1019Met)                 | 22           | c.3323G>A        | p.(Arg1108His)         | AR                   | AR                | Stargardt disease/cone-rod dystrophy    |                                   | NA          |
| MD-1457 | STGD                | ABCA4 | NM_000350    | 44           | c.6089C>T           | p.(Arg2030*)                   | 47           | c.6475T>C        | p.(Ser2159Pro) novel   | AR                   | AR                | Stargardt disease/cone-rod dystrophy    |                                   | Yes         |
| MD-1464 | STGD                | ABCA4 | NM_000350    | 13           | c.1766C>A           | p.(Trp589*)                    | 22           | c.3292C>T        | p.(Arg1098Cys)         | sporadic             | AR                | Stargardt disease/cone-rod dystrophy    |                                   | Yes         |
| MD-1468 | CCRD                | ABCA4 | NM_000350    | IVS6-Ex6     | c.699_768+341del    | p.(Gln234Phefs*5)              | IVS6-Ex6     | c.699_768+341del | p.(Gln234Phefs*5)      | sporadic             | AR                | Stargardt disease/cone-rod dystrophy    |                                   | NA          |
| MD-1470 | OtherMD             | ABCA4 | NM_000350    | IVS38        | c.5461-6T>C         | p.7 novel                      | 42           | c.5882G>A        | p.(Gly1961Glu)         | sporadic             | AR                | Stargardt disease/cone-rod dystrophy    |                                   | NA          |
| MD-1471 | OtherMD             | ABCA4 | NM_000350    | 23           | c.3386G>T           | p.(Arg1129Leu)                 | 45           | c.6179T>G        | p.(Leu2060Arg)         | AR                   | AR                | Stargardt disease/cone-rod dystrophy    |                                   | Yes         |
| MD-1473 | STGD                | ABCA4 | NM_000350    | 3            | c.2874del           | p.(Asn96Thfs*19)               | 40           | c.5714+5G>A      | p.[=Glu1863Leufs_33]   | AR                   | AR                | Stargardt disease/cone-rod dystrophy    |                                   | NA          |
| MD-1479 | OtherMD             | ABCA4 | NM_000350    | 23           | c.3386G>T           | p.(Arg1129Leu)                 | 43           | c.5929G>A        | p.(Gly1977Ser)         | AR                   | AR                | Stargardt disease/cone-rod dystrophy    |                                   | Yes         |
| MD-1485 | OtherMD             | ABCA4 | NM_000350    | 20           | c.2966T>C           | p.(Val989Ala)                  | 46           | c.6306C>G        | p.(Asp2102Glu) novel   | AR                   | AR                | Stargardt disease/cone-rod dystrophy    |                                   | Yes         |
| MD-1489 | STGD                | ABCA4 | NM_000350    | 23           | c.3386G>T           | p.(Arg1129Leu)                 | IVS4         | c.4253+4C>T      | p.(Ile1377Hisfs*3)     | AR                   | AR                | Stargardt disease/cone-rod dystrophy    |                                   | NA          |
| MD-1494 | STGD                | ABCA4 | NM_000350    | 25           | c.3813G>C           | p.(Glu1271Asp)                 | 48           | c.6718A>G        | p.(Thr2240Ala)         | AR                   | AR                | Stargardt disease/cone-rod dystrophy    |                                   | NA          |
| MD-1502 | STGD                | ABCA4 | NM_000350    | IVS40        | c.5714+5G>A         | p.[=Glu1863Leufs_33]           | 20           | c.3004C>T        | p.(Arg2002Trp)         | AR                   | AR                | Stargardt disease/cone-rod dystrophy    |                                   | NA          |
| MD-1510 | STGD                | ABCA4 | NM_000350    | 14           | c.2041C>T           | p.(Arg681*)                    | 42           | c.5882G>A        | p.(Gly1961Glu)         | AR                   | AR                | Stargardt disease/cone-rod dystrophy    |                                   | NA          |
| MD-1517 | CCRD                | ABCA4 | NM_000350    | 22,46        | c.[3322C>T;6320G>A] | p.[Arg1108Cys;Arg2107His]      | 42           | c.5882G>A        | p.(Gly1961Glu)         | sporadic             | AR                | Stargardt disease/cone-rod dystrophy    |                                   | NA          |
| MD-1519 | STGD                | ABCA4 | NM_000350    | 42           | c.5882G>A           | p.(Gly1961Glu)                 | 45           | c.6179T>G        | p.(Leu2060Arg)         | sporadic             | AR                | Stargardt disease/cone-rod dystrophy    |                                   | NA          |
| MD-1524 | OtherMD             | ABCA4 | NM_000350    | 8            | c.1025_1038del      | p.(Asp342Glyfs*6)              | 42           | c.5882G>A        | p.(Gly1961Glu)         | sporadic             | AR                | Stargardt disease/cone-rod dystrophy    |                                   | Yes         |
| MD-1535 | OtherMD             | ABCA4 | NM_000350    | 16           | c.2568C>A           | p.(Tyr856*)                    | IVS33        | c.4773+1G>T      | p.?                    | sporadic             | AR                | Stargardt disease/cone-rod dystrophy    |                                   | NA          |
| MD-1536 | STGD                | ABCA4 | NM_000350    | 28           | c.4200C>A           | p.(Gly1400*)                   | 44           | c.6089G>A        | p.(Arg2030Gln)         | sporadic             | AR                | Stargardt disease/cone-rod dystrophy    |                                   | NA          |
| MD-1538 | STGD                | ABCA4 | NM_000350    | 23           | c.[3386G>T;4947del] | p.[Arg1129Leu;Glu1650Argfs*12] | 40           | c.5603A>T        | p.(Asn1868Ile)         | sporadic             | AR                | Stargardt disease/cone-rod dystrophy    |                                   | Yes         |
| MD-1540 | CCRD                | ABCA4 | NM_000350    | 23           | c.3386G>T           | p.(Arg1129Leu)                 | 44           | c.6118C>T        | p.(Arg2040*)           | sporadic             | AR                | Stargardt disease/cone-rod dystrophy    |                                   | Yes         |
| MD-1543 | STGD                | ABCA4 | NM_000350    | 22           | c.3292C>T           | p.(Arg1098Cys)                 | 33           | c.4673G>A        | p.(Gly1558Glu) novel   | unknown              | AR                | Stargardt disease/cone-rod dystrophy    |                                   | NA          |
| MD-1544 | STGD                | ABCA4 | NM_000350    | 23,48        | c.[3386G>T;6718A>G] | p.[Arg1129Leu;Thr2240Ala]      | 6            | c.700C>T         | p.(Gln234*)            | AR                   | AR                | Stargardt disease/cone-rod dystrophy    |                                   | Yes         |
| MD-1546 | STGD                | ABCA4 | NM_000350    | 8            | c.982G>T            | p.(Glu328*)                    | 30           | c.4457C>T        | p.(Pro1486Leu)         | AR                   | AR                | Stargardt disease/cone-rod dystrophy    |                                   | NA          |
| MD-1551 | STGD                | ABCA4 | NM_000350    | 22,46        | c.[3322C>T;6320G>A] | p.[Arg1108Cys;Arg2107His]      | 23           | c.3386G>T        | p.(Arg1129Leu)         | sporadic             | AR                | Stargardt disease/cone-rod dystrophy    |                                   | Yes         |
| MD-1555 | OtherMD             | ABCA4 | NM_000350    | IVS41        | c.5836-1G>C         | p.?                            | 42           | c.5882G>A        | p.(Gly1961Glu)         | AR                   | AR                | Stargardt disease/cone-rod dystrophy    |                                   | NA          |
| MD-0159 | CCRD                | ADAM9 | NM_003816    | 14           | c.1420C>T           | p.(Arg474*)                    | 14           | c.1420C>T        | p.(Arg474*) novel      | sporadic             | AR                | Cone-rod dystrophy                      |                                   | Yes         |
| MD-0224 | CCRD                | BBS1  | NM_024649    | 12           | c.1169T>G           | p.(Met390Arg)                  | 12           | c.1169T>G        | p.(Met390Arg)          | sporadic             | AR                | Cone-rod dystrophy                      |                                   | NA          |
| MD-0352 | OtherMD             | BBS1  | NM_024649    | 16           | c.1645G>T           | p.(Glu549*)                    | 13           | c.1205T>C        | p.(Leu402Pro) novel    | AR                   | AR                | Cone-rod dystrophy                      |                                   | Yes         |
| MD-0365 | OtherMD             | BBS1  | NM_024649    | 12           | c.1169T>G           | p.(Met390Arg)                  | 12           | c.1169T>G        | p.(Met390Arg)          | sporadic             | AR                | Cone-rod dystrophy                      |                                   | Yes         |
| MD-1060 | OtherMD             | BBS1  | NM_024649    | 12           | c.1169T>G           | p.(Met390Arg)                  | 12           | c.1169T>G        | p.(Met390Arg)          | sporadic             | AR                | Cone-rod dystrophy                      |                                   | Yes         |
| MD-0134 | CCRD                | BEST1 | NM_004183    | 4            | c.388C>A            | p.(Arg130Ser)                  | 4            | c.388C>A         | p.(Arg130Ser)          | AR                   | AR                | Best disease                            |                                   | NA          |
| MD-0154 | OtherMD             | BEST1 | NM_004183    | 4            | c.388C>A            | p.(Arg130Ser)                  | 9            | c.1100+1G>A      | p.?                    | AR                   | AR                | Best disease                            |                                   | NA          |
| MD-0314 | OtherMD             | BEST1 | NM_004183    | 5            | c.536_538del        | p.(Asn179del)                  |              |                  |                        | sporadic             | AD                | Best disease                            | Segregation studies unavailable   | NA          |
| MD-0375 | OtherMD             | BEST1 | NM_004183    | 2            | c.11C>T             | p.(Thr41so)                    |              |                  |                        | sporadic             | AD                | Best disease                            | Segregation studies unavailable   | NA          |
| MD-0459 | OtherMD             | BEST1 | NM_004183    | 4            | c.388C>A            | p.(Arg130Ser)                  | 4            | c.388C>A         | p.(Arg130Ser)          | sporadic             | AR                | Best disease                            |                                   | Yes         |
| MD-0490 | CCRD                | BEST1 | NM_004183    | 4            | c.400C>G            | p.(Leu134Val)                  | 6            | c.638A>G         | p.(Glu213Gly)          | sporadic             | AR                | Best disease                            |                                   | NA          |
| MD-0525 | OtherMD             | BEST1 | NM_004183    | 8            | c.911A>T            | p.(Asp304Val)                  |              |                  |                        | sporadic             | AD                | Best disease                            | Segregation studies unavailable   | NA          |
| MD-0570 | OtherMD             | BEST1 | NM_004183    | 6            | c.638A>G            | p.(Glu213Gly)                  | 6            | c.638A>G         | p.(Glu213Gly)          | sporadic             | AR                | Best disease                            |                                   | NA          |
| MD-0610 | CCRD                | BEST1 | NM_004183    | 9            | c.974T>C            | p.(Met325Thr)                  | 9            | c.974T>C         | p.(Met325Thr)          | sporadic             | AR                | Best disease                            |                                   | NA          |
| MD-0685 | OtherMD             | BEST1 | NM_004183    | 10           | c.1550C>G           | p.(Ser517*)                    | 10           | c.1550C>G        | p.(Ser517*)            | sporadic             | AR                | Best disease                            |                                   | Yes         |
| MD-0749 | STGD                | BEST1 | NM_004183    | 8            | c.884T>A            | p.(Ile295Asn) novel            |              |                  |                        | sporadic             | AD                | Best disease                            | Segregation studies unavailable   | NA          |
| MD-1092 | OtherMD             | BEST1 | NM_004183    | 5            | c.596G>A            | p.(Gly199Asp) novel            | 9            | c.979del         | p.(Gln327Argfs*42)     | sporadic             | AR                | Best disease                            |                                   | Yes         |
| MD-1363 | OtherMD             | BEST1 | NM_004183    | 4            | c.388C>A            | p.(Arg130Ser)                  | 5            | c.521_522delTG   | p.(Leu174Glnfs*57)     | sporadic             | AR                | Best disease                            |                                   | NA          |
| MD-1369 | OtherMD             | BEST1 | NM_004183    | 7            | c.728C>T            | p.(Ala243Val)                  |              |                  |                        | sporadic             | AD                | Best disease                            | Segregation studies unavailable   | NA          |
| MD-1402 | OtherMD             | BEST1 | NM_004183    | 2            | c.44G>A             | p.(Gly15Asp)                   |              |                  |                        | unknown              | AD                | Best disease                            | Segregation studies unavailable   | NA          |
| MD-1437 | OtherMD             | BEST1 | NM_004183    | 3            | c.388C>A            | p.(Arg130Ser)                  | 3            | c.466C>T         | p.(His156Tyr) novel    | AR                   | AR                | Best disease                            |                                   | NA          |
| MD-0453 | CCRD                | CDHR1 | NM_033100    | 15           | c.1720C>G           | p.(Pro574Ala)                  | 15           | c.1720C>G        | p.(Pro574Ala)          | sporadic             | AR                | Cone-rod dystrophy                      |                                   | Yes         |
| MD-0930 | OtherMD             | CDHR1 | NM_033100    | 9            | c.838C>T            | p.(Arg280*)                    | 9            | c.838C>T         | p.(Arg280*)            | sporadic             | AR                | Cone-rod dystrophy                      |                                   | NA          |
| MD-0034 | CCRD                | CERKL | NM_001030311 | 5            | c.769C>T            | p.(Arg257*) novel              | 5            | c.769C>T         | p.(Arg257*)            | sporadic             | AR                | Cone-rod dystrophy/Retinitis pigmentosa |                                   | Yes         |
| MD-0470 | CCRD                | CERKL | NM_001030311 | 2            | c.356G>A            | p.(Gly119Asp)                  | 5            | c.769C>T         | p.(Arg257*)            | sporadic             | AR                | Cone-rod dystrophy/Retinitis pigmentosa |                                   | Yes         |
| MD-0662 | OtherMD             | CERKL | NM_001030311 | 6            | c.847C>T            | p.(Arg283*)                    | 6            | c.847C>T         | p.(Arg283*)            | sporadic             | AR                | Cone-rod dystrophy/Retinitis pigmentosa |                                   | NA          |
| MD-0707 | CCRD                | CERKL | NM_001030311 | 2            | c.356G>A            | p.(Gly119Asp)                  | 2            | c.356G>A         | p.(Gly119Asp)          | sporadic             | AR                | Cone-rod dystrophy/Retinitis pigmentosa |                                   | NA          |
| MD-0827 | CCRD                | CERKL | NM_001030311 | 6            | c.847C>T            | p.(Arg283*)                    | 14           | c.1641_1642del   | p.(Tyr548Trpfs*17)     | sporadic             | AR                | Cone-rod dystrophy/Retinitis pigmentosa |                                   | NA          |
| MD-0850 | STGD                | CERKL | NM_001030311 | 6            | c.847C>T            | p.(Arg283*)                    | 6            | c.847C>T         | p.(Arg283*)            | sporadic             | AR                | Cone-rod dystrophy/Retinitis pigmentosa |                                   | NA          |
| MD-0890 | CCRD                | CERKL | NM_001030311 | 6            | c.847C>T            | p.(Arg283*)                    | 6            | c.847C>T         | p.(Arg283*)            | sporadic             | AR                | Cone-rod dystrophy/Retinitis pigmentosa |                                   | Yes         |
| MD-0951 | OtherMD             | CERKL | NM_001030311 | 6            | c.847C>T            | p.(Arg283*)                    | 6            | c.847C>T         | p.(Arg283*)            | unknown              | AR                | Cone-rod dystrophy/Retinitis pigmentosa |                                   | NA          |
| MD-1297 | OtherMD             | CERKL | NM_001030311 | 6            | c.847C>T            | p.(Arg283*)                    | 6            | c.847C>T         | p.(Arg283*)            | AR                   | AR                | Cone-rod dystrophy/Retinitis pigmentosa |                                   | NA          |
| MD-1465 | OtherMD             | CERKL | NM_001030311 | 2            | c.317G>A            | p.(Arg106His) novel            | 2            | c.317G>A         | p.(Arg106His)          | AR                   | AR                | Cone-rod dystrophy/Retinitis pigmentosa |                                   | Yes         |

Abbreviations: AR: autosomal recessive; AD: autosomal dominant; CCRD, cone and cone-rod dystrophies; IVS, intron; NA, not available; STGD, Stargardt disease; otherMD, other maculopathies; XL: X-linked



Table S2. Description of genetics and clinical findings in 677 characterized *a priori* ar/SMD families. Novel variants are highlighted in gray.

| Family  | Suspected diagnosis | Gene   | RefSeq_NM    | Allele1_exon | Allele1_cDNA          | Allele1_protein                 | Allele2_exon         | Allele2_cDNA          | Allele2_protein                  | Inheritance a priori | Final inheritance | Clinical reclassification               | Genetic reclassification comments                          | Segregation |
|---------|---------------------|--------|--------------|--------------|-----------------------|---------------------------------|----------------------|-----------------------|----------------------------------|----------------------|-------------------|-----------------------------------------|------------------------------------------------------------|-------------|
| MD-1488 | CCRD                | CERKL  | NM_001030311 | 2            | c.316C>T              | p.(Arg106Cys)                   | 2                    | c.316C>T              | p.(Arg106Cys)                    | AR                   | AR                | Cone-rod dystrophy/Retinitis pigmentosa |                                                            | NA          |
| MD-0455 | STGD                | CHM    | NM_000390    | 8            | <b>c.1053del</b>      | <b>p.(Ile352*) novel</b>        |                      |                       |                                  | sporadic             | XL                | Choroideremia                           | Segregation studies unavailable. Affected males in family  | NA          |
| MD-0426 | CCRD                | CNGA3  | NM_001298    | 10           | c.1279C>T             | p.(Arg427Cys)                   | 14                   | c.1706G>A             | p.(Arg569His)                    | sporadic             | AR                | Cone-rod dystrophy                      |                                                            | NA          |
| MD-0526 | CCRD                | CNGA3  | NM_001298    | 8            | c.829C>T              | p.(Arg277Cys)                   | 8                    | c.829C>T              | p.(Arg277Cys)                    | AR                   | AR                | Cone-rod dystrophy                      |                                                            | Yes         |
| MD-0994 | CCRD                | CNGA3  | NM_001298    | 8            | <b>c.1691G&gt;C</b>   | <b>p.(Arg564Thr) novel</b>      | 8                    | c.1691G>C             | p.(Arg564Thr)                    | AR                   | AR                | Cone-rod dystrophy                      |                                                            | NA          |
| MD-1030 | OtherMD             | CNGA3  | NM_001298    | 8            | c.1011C>A             | p.(Trp337*)                     | 8                    | c.1642G>A             | p.(Gly548Arg)                    | AR                   | AR                | Cone-rod dystrophy                      |                                                            | NA          |
| MD-1117 | OtherMD             | CNGA3  | NM_001298    | 8            | c.778G>A              | p.(Asp260Asn)                   | 8                    | c.940_942del          | p.(Ile314del)                    | AR                   | AR                | Cone-rod dystrophy                      |                                                            | NA          |
| MD-1252 | CCRD                | CNGA3  | NM_001298    | 8            | c.811C>G              | p.(Pro271Ala)                   | 8                    | c.1201T>C             | p.(Ser401Pro)                    | sporadic             | AR                | Cone-rod dystrophy                      |                                                            | Yes         |
| MD-1525 | OtherMD             | CNGA3  | NM_001298    | 8            | <b>c.1320del</b>      | <b>p.(Trp440Cysfs*25) novel</b> | 8                    | c.1320del             | p.(Trp440Cysfs*25) novel         | unknown              | AR                | Cone-rod dystrophy                      |                                                            | NA          |
| MD-1104 | CCRD                | CNGB1  | NM_001297    | IVS6         | <b>c.412+1G&gt;T</b>  | <b>p.? novel</b>                | IVS6                 | c.412+1G>T            | p.?                              | AR                   | AR                | Retinitis pigmentosa                    |                                                            | NA          |
| MD-0193 | CCRD                | CNGB3  | NM_019098    | 10           | c.1148del             | p.(Thr383Ilefs*13)              | 10                   | c.1148del             | p.(Thr383Ilefs*13)               | sporadic             | AR                | Cone dystrophy                          |                                                            | NA          |
| MD-0397 | CCRD                | CNGB3  | NM_019098    | 12           | c.1432C>T             | p.(Arg478*)                     | 12                   | c.1432C>T             | p.(Arg478*)                      | sporadic             | AR                | Cone dystrophy                          |                                                            | NA          |
| MD-0938 | CCRD                | CNGB3  | NM_019098    | 5            | c.503C>T              | p.(Thr168Met)                   | 5                    | c.503C>T              | p.(Thr168Met)                    | sporadic             | AR                | Cone dystrophy                          |                                                            | Yes         |
| MD-0982 | CCRD                | CNGB3  | NM_019098    | 7            | c.886_896delinsT      | p.(Thr296Tyrfs*9)               | 10                   | <b>c.1157T&gt;A</b>   | <b>p.(Val386Glu) novel</b>       | sporadic             | AR                | Cone dystrophy                          |                                                            | NA          |
| MD-1023 | CCRD                | CNGB3  | NM_019098    | IVS6         | c.852+1G>C            | p.?                             | 10                   | c.1148del             | p.(Thr383Ilefs*13)               | sporadic             | AR                | Cone dystrophy                          |                                                            | NA          |
| MD-1066 | OtherMD             | CNGB3  | NM_019098    | 10           | c.1148del             | p.(Thr383Ilefs*13)              | 12                   | c.1432C>T             | p.(Arg478*)                      | sporadic             | AR                | Cone dystrophy                          |                                                            | NA          |
| MD-1221 | OtherMD             | CNGB3  | NM_019098    | 1            | c.2T>C                | p.Met1?                         | 10                   | c.1148del             | p.(Thr383Ilefs*13)               | AR                   | AR                | Cone dystrophy                          |                                                            | NA          |
| MD-1227 | STGD                | CNGB3  | NM_019098    | 10           | <b>c.1098_1101dup</b> | <b>p.(Ala368*) novel</b>        | 11                   | c.1208G>A             | p.(Arg403Gln)                    | sporadic             | AR                | Cone dystrophy                          |                                                            | Yes         |
| MD-1492 | CCRD                | CNGB3  | NM_019098    | 10           | c.1148del             | p.(Thr383Ilefs*13)              | 10                   | c.1148del             | p.(Thr383Ilefs*13)               | AR                   | AR                | Cone dystrophy                          |                                                            | NA          |
| MD-1513 | OtherMD             | CNGB3  | NM_019098    | 10           | c.1148del             | p.(Thr383Ilefs*13)              | 18                   | <b>c.2181_2184del</b> | <b>p.(Glu729Metfs*99) novel</b>  | AR                   | AR                | Cone dystrophy                          |                                                            | NA          |
| MD-1554 | OtherMD             | CNGB3  | NM_019098    | 10           | c.1148del             | p.(Thr383Ilefs*13)              | 18                   | c.2181_2184del        | p.(Glu729Metfs*99) novel         | unknown              | AR                | Cone dystrophy                          |                                                            | NA          |
| MD-0211 | STGD                | CRB1   | NM_201253    | 2            | c.498_506del          | p.(Ile167_Gly169del)            | 9                    | c.2843G>A             | p.(Cys948Tyr)                    | sporadic             | AR                | Cone-rod dystrophy                      |                                                            | NA          |
| MD-0303 | OtherMD             | CRB1   | NM_201253    | 9            | c.2843G>A             | p.(Cys948Tyr)                   | 9                    | c.2843G>A             | p.(Cys948Tyr)                    | sporadic             | AR                | Leber congenital amaurosis              |                                                            | Yes         |
| MD-0351 | OtherMD             | CRB1   | NM_201253    | 9            | c.2843G>A             | p.(Cys948Tyr)                   | 9                    | c.3157A>G             | p.(Met1053Val)                   | sporadic             | AR                | Cone-rod dystrophy                      |                                                            | Yes         |
| MD-0361 | OtherMD             | CRB1   | NM_201253    | 2            | c.498_506del          | p.(Ile167_Gly169del)            | 9                    | <b>c.3055_3059dup</b> | <b>p.(Met1020Ilefs*4) novel</b>  | sporadic             | AR                | Cone-rod dystrophy                      |                                                            | NA          |
| MD-0385 | CCRD                | CRB1   | NM_201253    | 2            | c.498_506del          | p.(Ile167_Gly169del)            | 9                    | c.3297T>C             | p.(Ile1100Thr)                   | sporadic             | AR                | Cone-rod dystrophy                      |                                                            | NA          |
| MD-0517 | CCRD                | CRB1   | NM_201253    | 2            | c.613_619del          | p.(Ile205Aspfs*13)              | 6                    | c.1690G>T             | p.(Arg564Tyr)                    | sporadic             | AR                | Leber congenital amaurosis              |                                                            | Yes         |
| MD-0643 | CCRD                | CRB1   | NM_201253    | 7            | c.2234C>T             | p.(Thr745Met)                   | 9                    | c.2843T>A             | p.(Cys948Tyr)                    | sporadic             | AR                | Leber congenital amaurosis              |                                                            | Yes         |
| MD-0652 | OtherMD             | CRB1   | NM_201253    | 6            | c.1910C>T             | p.(Pro637Leu)                   | 6                    | c.1910C>T             | p.(Pro637Leu)                    | AR                   | AR                | Cone-rod dystrophy                      |                                                            | NA          |
| MD-0670 | OtherMD             | CRB1   | NM_201253    | 2            | c.498_506del          | p.(Ile167_Gly169del)            | 7                    | c.2843G>A             | p.(Cys948Tyr)                    | sporadic             | AR                | Cone-rod dystrophy                      |                                                            | Yes         |
| MD-0786 | CCRD                | CRB1   | NM_201253    | 7            | c.2290C>T             | p.(Arg764Cys)                   | 7                    | c.2290C>T             | p.(Arg764Cys)                    | sporadic             | AR                | Cone-rod dystrophy                      |                                                            | NA          |
| MD-0824 | OtherMD             | CRB1   | NM_201253    | 2            | <b>c.635G&gt;T</b>    | <b>p.(Cys212Phe) novel</b>      | 11                   | <b>c.3946_3949del</b> | <b>p.(Leu1316Thrfs*24) novel</b> | AR                   | AR                | Cone-rod dystrophy                      |                                                            | NA          |
| MD-0860 | OtherMD             | CRB1   | NM_201253    | 2            | c.498_506del          | p.(Ile167_Gly169del)            | 9                    | c.3307G>A             | p.(Gly1103Arg)                   | AR                   | AR                | Cone-rod dystrophy                      |                                                            | NA          |
| MD-0876 | CCRD                | CRB1   | NM_201253    | 2            | c.498_506del          | p.(Ile167_Gly169del)            | 6                    | c.1360G>C             | p.(Gly454Arg)                    | AR                   | AR                | Cone-rod dystrophy                      |                                                            | NA          |
| MD-0907 | STGD                | CRB1   | NM_201253    | 2            | c.481G>A              | p.(Ala161Thr)                   | 2                    | c.481G>A              | p.(Ala161Thr)                    | sporadic             | AR                | Cone-rod dystrophy                      |                                                            | NA          |
| MD-1247 | OtherMD             | CRB1   | NM_201253    | 6            | c.1910C>T             | p.(Pro637Leu)                   | 6                    | c.1910C>T             | p.(Pro637Leu)                    | sporadic             | AR                | Cone-rod dystrophy                      |                                                            | Yes         |
| MD-1253 | OtherMD             | CRB1   | NM_201253    | 3            | c.653-1G>T            | p.?                             | 8                    | c.268T>A              | p.(Cys986*)                      | unknown              | AR                | Cone-rod dystrophy                      |                                                            | NA          |
| MD-1266 | OtherMD             | CRB1   | NM_201253    | 2            | c.498_506del          | p.(Ile167_Gly169del)            | 7                    | c.2843G>A             | p.(Cys948Tyr)                    | sporadic             | AR                | Cone-rod dystrophy                      |                                                            | NA          |
| MD-1283 | OtherMD             | CRB1   | NM_201253    | 2            | c.498_506del          | p.(Ile167_Gly169del)            | 7                    | c.2843G>A             | p.(Cys948Tyr)                    | sporadic             | AR                | Cone-rod dystrophy                      |                                                            | Yes         |
| MD-1491 | OtherMD             | CRB1   | NM_201253    | 2            | c.498_506del          | p.(Ile167_Gly169del)            | 7                    | c.2291G>A             | p.(Arg764His)                    | AR                   | AR                | Cone-rod dystrophy                      |                                                            | NA          |
| MD-0142 | CCRD                | CRX    | NM_000554    | 3            | c.121C>T              | p.(Arg41Trp)                    |                      |                       |                                  | AR                   | AD                | Cone-rod dystrophy                      | Inherited variant                                          | Yes         |
| MD-0258 | STGD                | CRX    | NM_000554    | 3            | c.121C>T              | p.(Arg41Trp)                    |                      |                       |                                  | sporadic             | AD                | Cone-rod dystrophy                      | Incomplete penetrance                                      | Yes         |
| MD-0893 | OtherMD             | CRX    | NM_000554    | 3            | c.121C>T              | p.(Arg41Trp)                    |                      |                       |                                  | sporadic             | AD                | Cone-rod dystrophy                      | Segregation studies unavailable                            | NA          |
| MD-1289 | OtherMD             | CRX    | NM_000554    | 3            | c.121C>T              | p.(Arg41Trp)                    |                      |                       |                                  | sporadic             | AD                | Cone-rod dystrophy                      | Inherited variant                                          | Yes         |
| MD-0289 | STGD                | EYS    | NM_001142800 | IVS29        | c.6079-2A>G           | p.?                             | IVS29                | c.6079-2A>G           | p.?                              | sporadic             | AR                | Retinitis pigmentosa                    |                                                            | NA          |
| MD-1435 | CCRD                | GNAT2  | NM_005272    | 7            | c.811_813del          | p.(Lys271del)                   | 7                    | c.811_813del          | p.(Lys271del)                    | sporadic             | AR                | Cone dystrophy                          |                                                            | NA          |
| MD-1069 | OtherMD             | GUCY2D | NM_000180    | 13           | c.2512C>T             | p.(Arg838Cys)                   |                      |                       |                                  | AR                   | AD                | Cone-rod dystrophy                      | Inherited variant, daughter affected, AD pattern confirmed | Yes         |
| MD-1131 | CCRD                | GUCY2D | NM_000180    | 13           | c.2513G>A             | p.(Arg838His)                   |                      |                       |                                  | sporadic             | AD                | Cone-rod dystrophy                      | Segregation studies unavailable                            | NA          |
| MD-0151 | CCRD                | KCNV2  | NM_133497    | 1            | c.778A>T              | p.(Lys260*)                     | 1                    | c.778A>T              | p.(Lys260*)                      | AR                   | AR                | Cone-rod dystrophy                      |                                                            | NA          |
| MD-0616 | CCRD                | KCNV2  | NM_133497    | 1            | <b>c.625G&gt;T</b>    | <b>p.(Glu209*) novel</b>        | deletion entire gene |                       |                                  | sporadic             | AR                | Cone-rod dystrophy                      |                                                            | Yes         |
| MD-0775 | STGD                | OPA1   | NM_015560    | 9            | c.1861C>T             | p.(Gln621*)                     |                      |                       |                                  | sporadic             | AD                | Optic atrophy                           | Segregation studies unavailable                            | NA          |
| MD-0073 | OtherMD             | PDE6C  | NM_006204    | 4            | <b>c.833C&gt;T</b>    | <b>p.(Ser278Phe) novel</b>      | 4                    | c.833C>T              | p.(Ser278Phe)                    | sporadic             | AR                | Cone dystrophy                          |                                                            | NA          |
| MD-0117 | OtherMD             | PDE6C  | NM_006204    | 4            | c.833C>T              | p.(Ser278Phe)                   | 4                    | c.833C>T              | p.(Ser278Phe)                    | sporadic             | AR                | Cone dystrophy                          |                                                            | NA          |
| MD-1020 | OtherMD             | PDE6C  | NM_006204    | 1            | c.311G>A              | p.(Arg104Gln)                   | 1                    | c.311G>A              | p.(Arg104Gln)                    | AR                   | AR                | Cone dystrophy                          |                                                            | NA          |
| MD-1504 | CCRD                | PDE6C  | NM_006204    | IVS1         | <b>c.480+1G&gt;A</b>  | <b>p.? novel</b>                | IVS1                 | c.480+1G>A            | p.?                              | AR                   | AR                | Cone dystrophy                          |                                                            | NA          |
| MD-1514 | CCRD                | PDE6C  | NM_006204    | 13           | <b>c.1651A&gt;G</b>   | <b>p.(Thr551Ala) novel</b>      | 13                   | c.1651A>G             | p.(Thr551Ala)                    | AR                   | AR                | Cone dystrophy                          |                                                            | NA          |
| MD-0403 | STGD                | PLA2G5 | NM_000929    | 5            | <b>c.309C&gt;A</b>    | <b>p.(Cys103*) novel</b>        | 5                    | c.309C>A              | p.(Cys103*)                      | AR                   | AR                | Fundus albipunctatus like               |                                                            | NA          |
| MD-1458 | STGD                | PLA2G5 | NM_000929    | 5            | c.309C>A              | p.(Cys103*)                     | 5                    | c.309C>A              | p.(Cys103*)                      | sporadic             | AR                | Fundus albipunctatus like               |                                                            | Yes         |
| MD-0100 | CCRD                | PROM1  | NM_006017    | IVS5         | c.630+1G>A            | p.?                             | IVS5                 | c.630+1G>A            | p.?                              | sporadic             | AR                | Cone-rod dystrophy                      |                                                            | Yes         |
| MD-0383 | STGD                | PROM1  | NM_006017    | 12           | c.1354dup             | p.(Tyr452Leufs*13)              | 12                   | c.1354dup             | p.(Tyr452Leufs*13)               | sporadic             | AR                | Cone-rod dystrophy                      |                                                            | NA          |
| MD-0649 | CCRD                | PROM1  | NM_006017    | IVS5         | c.630+1G>A            | p.?                             | IVS5                 | c.630+1G>A            | p.?                              | sporadic             | AR                | Cone-rod dystrophy                      |                                                            | NA          |
| MD-0654 | CCRD                | PROM1  | NM_006017    | 12           | c.1414del             | p.(Arg472Glufs*18)              | 12                   | c.1414del             | p.(Arg472Glufs*18)               | sporadic             | AR                | Cone-rod dystrophy                      |                                                            | NA          |
| MD-0682 | OtherMD             | PROM1  | NM_006017    | 12           | c.1354dup             | p.(Tyr452Leufs*13)              | 12                   | c.1354dup             | p.(Tyr452Leufs*13)               | sporadic             | AR                | Cone-rod dystrophy                      |                                                            | NA          |
| MD-0782 | CCRD                | PROM1  | NM_006017    | IVS17        | c.1984-1G>T           | p.?                             | IVS17                | c.1984-1G>T           | p.?                              | sporadic             | AR                | Cone-rod dystrophy                      |                                                            | Yes         |
| MD-0803 | CCRD                | PROM1  | NM_006017    | 12           | c.1354dup             | p.(Tyr452Leufs*13)              | 12                   | c.1354dup             | p.(Tyr452Leufs*13)               | sporadic             | AR                | Cone-rod dystrophy                      |                                                            | Yes         |
| MD-0838 | CCRD                | PROM1  | NM_006017    | 12           | c.1354dup             | p.(Tyr452Leufs*13)              | 12                   | c.1354dup             | p.(Tyr452Leufs*13)               | sporadic             | AR                | Cone-rod dystrophy                      |                                                            | Yes         |
| MD-0873 | CCRD                | PROM1  | NM_006017    | IVS17        | c.1984-1G>T           | p.?                             | IVS17                | c.1984-1G>T           | p.?                              | AR                   | AR                | Cone-rod dystrophy                      |                                                            | Yes         |
| MD-1037 | OtherMD             | PROM1  | NM_006017    | 12           | c.1354dup             | p.(Tyr452Leufs*13)              | 12                   | <b>c.1363G&gt;C</b>   | <b>p.(Gly455Arg) novel</b>       | AR                   | AR                | Cone-rod dystrophy                      |                                                            | Yes         |

Abbreviations: AR: autosomal recessive; AD: autosomal dominant; CCRD, cone and cone-rod dystrophies; IVS, intron; NA, not available; STGD, Stargardt disease; otherMD, other maculopathies; XL: X-linked

**Table S2. Description of genetics and clinical findings in 677 characterized *a priori* ar/sMD families. Novel variants are highlighted in gray.**

| Family  | Suspected diagnosis | Gene    | RefSeq_NM    | Allele1_exon | Allele1_cDNA          | Allele1_protein                 | Allele2_exon        | Allele2_cDNA        | Allele2_protein            | Inheritance a priori | Final inheritance | Clinical reclassification             | Genetic reclassification comments               | Segregation |
|---------|---------------------|---------|--------------|--------------|-----------------------|---------------------------------|---------------------|---------------------|----------------------------|----------------------|-------------------|---------------------------------------|-------------------------------------------------|-------------|
| MD-1487 | OtherMD             | PROM1   | NM_006017    | 17           | <b>c.1912-1G&gt;T</b> | <b>p.7 novel</b>                | deletion exons 9-12 |                     |                            | AR                   | AR                | Cone-rod dystrophy                    |                                                 | Yes         |
| RP-0855 | STGD                | PROM1   | NM_006017    | 12           | c.1354dup             | p.(Tyr452Leufs*13)              | 12                  | c.1354dup           | p.(Tyr452Leufs*13)         | AR                   | AR                | Cone-rod dystrophy                    |                                                 | Yes         |
| RP-1852 | OtherMD             | PROM1   | NM_006017    | 12           | c.1435G>A             | p.(Gly479Arg)                   | 12                  | c.1435G>A           | p.(Gly479Arg)              | AR                   | AR                | Cone-rod dystrophy                    |                                                 | NA          |
| MD-0236 | STGD                | PRPH2   | NM_000322    | 1            | c.499G>A              | p.(Gly167Ser)                   |                     |                     |                            | AR                   | AD                | Cone-rod dystrophy                    | Inherited variant                               | Yes         |
| MD-0381 | OtherMD             | PRPH2   | NM_000322    | 2            | c.584G>T              | p.(Arg195Leu)                   |                     |                     |                            | AR                   | AD                | Cone-rod dystrophy                    | Segregation studies unavailable                 | NA          |
| MD-0489 | STGD                | PRPH2   | NM_000322    | 1            | c.493T>C              | p.(Cys165Arg)                   |                     |                     |                            | AR                   | AD                | Cone-rod dystrophy                    | Incomplete penetrance                           | Yes         |
| MD-0511 | STGD                | PRPH2   | NM_000322    | 1            | <b>c.52C&gt;T</b>     | <b>p.(Gln18*) novel</b>         |                     |                     |                            | unknown              | AD                | Cone-rod dystrophy                    | Segregation studies unavailable                 | NA          |
| MD-0972 | OtherMD             | PRPH2   | NM_000322    | 2            | <b>c.734_737dup</b>   | <b>p.(Trp246Cysfs*56) novel</b> |                     |                     |                            | AR                   | AD                | Cone-rod dystrophy                    | Segregation studies unavailable                 | NA          |
| MD-1345 | OtherMD             | PRPH2   | NM_000322    | 2            | c.628C>T              | p.(Pro210Ser)                   |                     |                     |                            | sporadic             | AD                | Cone-rod dystrophy                    | Segregation studies unavailable                 | NA          |
| MD-1389 | STGD                | PRPH2   | NM_000322    | 2            | c.584G>T              | p.(Arg195Leu)                   |                     |                     |                            | sporadic             | AD                | Cone-rod dystrophy                    | Segregation studies unavailable                 | NA          |
| MD-1395 | OtherMD             | PRPH2   | NM_000322    | 2            | c.584G>T              | p.(Arg195Leu)                   |                     |                     |                            | AR                   | AD                | Cone-rod dystrophy                    | Cousin affected                                 | NA          |
| MD-1449 | CCRD                | PRPH2   | NM_000322    | 2            | <b>c.649_650ins17</b> | <b>p.(Ser217Ilefs*45) novel</b> |                     |                     |                            | sporadic             | AD                | Cone-rod dystrophy                    | Segregation studies unavailable                 | NA          |
| MD-0312 | CCRD                | RAB28   | NM_004249    | IVS2         | c.172+1G>C            | p.?                             | IVS2                | c.172+1G>C          | p.?                        | sporadic             | AR                | Cone-rod dystrophy                    |                                                 | Yes         |
| MD-0448 | CCRD                | RAB28   | NM_004249    | 7            | c.651T>G              | p.(Cys217Trp)                   | 7                   | c.651T>G            | p.(Cys217Trp)              | sporadic             | AR                | Cone-rod dystrophy                    |                                                 | Yes         |
| MD-0491 | OtherMD             | RDH12   | NM_152443    | 8            | c.701G>A              | p.(Arg234His)                   | 8                   | <b>c.795C&gt;A</b>  | <b>p.(Ser265Arg) novel</b> | sporadic             | AR                | Cone-rod dystrophy                    |                                                 | Yes         |
| MD-0639 | CCRD                | RDH12   | NM_152443    | 8            | c.701G>A              | p.(Arg234His)                   | 8                   | c.784dup            | p.(Ala262Glyfs*11)         | AR                   | AR                | Cone-rod dystrophy                    |                                                 | NA          |
| MD-0970 | CCRD                | RDH12   | NM_152443    | 5            | c.278T>C              | p.(Leu93Pro)                    | 5                   | c.278T>C            | p.(Leu93Pro)               | sporadic             | AR                | Cone-rod dystrophy                    |                                                 | Yes         |
| MD-1078 | OtherMD             | RDH12   | NM_152443    | 5            | c.278T>C              | p.(Leu93Pro)                    | 5                   | c.278T>C            | p.(Leu93Pro)               | sporadic             | AR                | Cone-rod dystrophy                    |                                                 | NA          |
| MD-1413 | CCRD                | RDH12   | NM_152443    | 5            | c.278T>C              | p.(Leu93Pro)                    | 7                   | c.505C>T            | p.(Arg169Trp)              | AR                   | AR                | Cone-rod dystrophy                    |                                                 | Yes         |
| MD-1378 | CCRD                | RHO     | NM_000539    | 4            | <b>c.826T&gt;G</b>    | <b>p.(Phe276Val) novel</b>      |                     |                     |                            | sporadic             | AD                | Retinitis pigmentosa                  | Segregation studies unavailable                 | NA          |
| MD-0620 | OtherMD             | RLBP1   | NM_000326    | 6            | c.504_508del          | p.(Ser168Argfs*5)               | 6                   | c.504_508del        | p.(Ser168Argfs*5)          | sporadic             | AR                | Retinitis pigmentosa                  |                                                 | Yes         |
| MD-0693 | STGD                | RP2     | NM_006915    | 2            | c.409_411del          | p.(Ile137del)                   |                     |                     |                            | sporadic             | XL                | Retinitis pigmentosa                  | Segregation studies unavailable                 | NA          |
| MD-0507 | CCRD                | RPGR    | NM_001034853 | 15           | c.2405_2406del        | p.(Glu802Glyfs*32)              |                     |                     |                            | sporadic             | XL                | Retinitis pigmentosa                  | Segregation studies unavailable                 | NA          |
| MD-0983 | CCRD                | RPGR    | NM_001034853 | 15           | <b>c.3382C&gt;T</b>   | <b>p.(Arg1128*) novel</b>       |                     |                     |                            | unknown              | XL                | Retinitis pigmentosa                  | Segregation studies unavailable                 | NA          |
| MD-1062 | OtherMD             | RPGR    | NM_001034853 | 8            | c.872del              | p.(Asn291Ilefs*7)               |                     |                     |                            | sporadic             | XL                | Retinitis pigmentosa                  | Segregation studies unavailable                 | NA          |
| MD-0327 | CCRD                | RPGRIP1 | NM_020366    | IVS17        | <b>c.2895+1G&gt;T</b> | <b>p.7 novel</b>                | IVS17               | c.2895+1G>T         | p.?                        | sporadic             | AR                | Leber congenital amaurosis            |                                                 | Yes         |
| MD-0671 | STGD                | RS1     | NM_000330    | 5            | c.410T>C              | p.(Leu137Pro)                   |                     |                     |                            | AR                   | XL                | Retinoschisis                         | Affected males in the family, Inherited variant | Yes         |
| MD-1398 | OtherMD             | RS1     | NM_000330    | 3            | <b>c.150G&gt;T</b>    | <b>p.(Trp50Cys) novel</b>       |                     |                     |                            | sporadic             | XL                | Retinoschisis                         | Inherited variant                               | Yes         |
| MD-1344 | CCRD                | TRPM1   | NM_002420    | 6            | c.428-1G>C            | p.?                             | 23                  | c.2782C>T           | p.(Arg928Trp)              | sporadic             | AR                | Congenital stationary night blindness |                                                 | NA          |
| MD-0179 | CCRD                | TTL5    | NM_015072    | 5            | <b>c.211C&gt;T</b>    | <b>p.(Arg71*) novel</b>         | 21                  | <b>c.2029C&gt;T</b> | <b>p.(Arg677*) novel</b>   | AR                   | AR                | Cone dystrophy                        |                                                 | NA          |
| MD-0884 | CCRD                | USH2A   | NM_206933    | 44           | c.8693A>C             | p.(Tyr2898Ser)                  | 63                  | c.13531G>A          | p.(Ala4511Thr)             | sporadic             | AR                | Retinitis pigmentosa                  |                                                 | Yes         |

Abbreviations: AR: autosomal recessive; AD: autosomal dominant; CCRD, cone and cone-rod dystrophies; IVS, intron; NA, not available; STGD, Stargardt disease; otherMD, other maculopathies; XL: X-linked
